# Supplementary material for: All metrics are equal, but some metrics are more equal than others: A systematic search and review on the use of the term ‘metric’
Source: PLoS One. 2018 Mar 6;13(3):e0193861. doi: 10.1371/journal.pone.0193861 (PMC5839589; doi:10.1371/journal.pone.0193861)
Supplement: S6 Appendix — (XLSX) [file pone.0193861.s006.xlsx]

## Sheet: Included articles
			Number of uses in the paper						Abbreviations
Article	Paradigm	Type	Metric	IS	CM	FM	Full text review		IRT: Item Response Theory MTT: Modern Test Theory RMT: Rasch Measurement Theory	Th: Theoretical Me: Methodological Te: Teaching A: Applied Mi: Miscellaneous	IS: Interval scale CM: Conjoint Measurement FM: Fundamental Measurement
Andrich_2002_JAM	RMT	Th	1	0	0	1	Yes
Andrich_2003_SSInf	RMT	Th	3	0	5	4	Yes
Andrich_2004_MedCar	MTT	Th	0	0	1	22	Yes
BarrettP_2003_JManPsy	MTT	Th	1	1	5	0	Yes
Borsboom_2004_TaP	MTT	Th	0	1	25	4	Yes
BriggsDC_2013_JEduMea_B	MTT	Th	3	47	26	0	Yes
BriggsDC_2015_Measur_B	MTT	Th	0	4	2	0	Yes
BriggsDC_2015_Measur_C	MTT	Th	2	8	0	0	Yes
Bunderson_2011_JAM	RMT	Th	1	0	0	3	Yes
Cantley_2015_TaP	MTT	Th	0	0	1	4	Yes
Embretson_2004_Measur	MTT	Th	0	0	0	6	Yes
FischerKW_2002_MSRCD	RMT	Th	0	1	0	0	Yes
FisherWPJ_2003_TaP_A	RMT	Th	1	0	1	0	Yes
FisherWPJ_2003_TaP_B	RMT	Th	15	3	6	14	Yes
FisherWPJ_2004_HumStu	RMT	Th	8	0	1	3	Yes
FisherWPJ_2005_JAM_A	RMT	Th	7	0	0	0	Yes
FisherWPJ_2005_QoLR_B	RMT	Th	8	1	0	2	Yes
FisherWPJ_2011_IJMRApp_A	RMT	Th	5	1	0	0	Yes
FisherWPJ_2011_JAM_B	RMT	Th	8	0	0	0	Yes
FisherWPJ_2011_Measur_C	RMT	Th	1	0	0	2	Yes
Heene_2011_Measur_A	MTT	Th	0	0	0	1	Yes
Heene_2013_FiP	MTT	Th	0	3	2	0	Yes
Heiser_2004_Psych	RMT	Th	2	0	0	0	Yes
HernandezOrallo_2014_CogSysRes	IRT	Th	2	0	0	0	Yes
HernandezOrallo_2015_AAMAS	IRT	Th	1	0	0	0	Yes
Hessen_2004_JAM	MTT	Th	4	11	0	0	Yes
Humphry_2011_Measur	MTT	Th	5	0	0	0	Yes
Humphry_2013_TaP	MTT	Th	0	3	3	0	Yes
Karabatsos_2001_JAM	MTT	Th	5	10	51	2	Yes
Krabbe_2013_PLOSONE	RMT	Th	7	5	1	2	Yes
Krause_2013_RGenPsy	IRT	Th	9	1	2	0	Yes
Kyngdon_2011_Measur_B	MTT	Th	2	1	4	0	Yes
Kyngdon_2013_TaP	IRT	Th	1	4	7	0	Yes
Markus_2012_TaP	RMT	Th	0	0	3	0	Yes
MaydeuOlivares_2013_Measur	IRT	Th	4	0	0	0	Yes
McGrath_2005_JPerAss	IRT	Th	0	0	0	1	Yes
Michell_2002_AJPsycho	MTT	Th	0	30	6	0	Yes
Michell_2003_JAM_A	RMT	Th	0	1	9	2	Yes
Michell_2004_TaP	MTT	Th	0	0	2	0	Yes
Michell_2012_FiP_A	IRT	Th	0	1	0	0	Yes
Michell_2012_TaP_B	RMT	Th	0	14	0	0	Yes
Michell_2014_TaP	MTT	Th	4	0	32	0	Yes
Noventa_2014_Psych_A	MTT	Th	14	30	13	1	Yes
Noventa_2014_SJP_B	RMT	Th	4	3	1	0	Yes
Penfield_2005_JAM	RMT	Th	0	0	1	0	Yes
Rupp_2003_AJERes	MTT	Th	0	0	1	0	Yes
ScholtenAZ_2011_Measur	MTT	Th	0	1	0	0	Yes
Sijtsma_2012_TaP	MTT	Th	12	0	5	0	Yes
Stenner_2013_FiP	RMT	Th	0	2	2	0	Yes
Stone_2014_JAM	RMT	Th	1	1	8	2	Yes
Trendler_2013_TaP	RMT	Th	0	1	3	0	Yes
Ali_2015_APsyMea	IRT	Me	2	0	0	0	Yes
Andrews_2002_CogPsy	RMT	Me	39	0	0	0	Yes
Andrich_2012_JEBS	RMT	Me	5	0	0	0	Yes
Arai_2011_Behavior	IRT	Me	2	0	0	0	Yes
Arce_2012_IJT	RMT	Me	7	0	0	0	Yes
Azevedo_2011_CSDAna	IRT	Me	2	0	0	0	Yes
Baghaei_2011_TPLanStu	RMT	Me	0	1	0	0	Yes
Baldwin_2011_JEduMea	IRT	Me	19	0	0	0	Yes
Baldwin_2013_BJMSP	IRT	Me	16	0	0	0	Yes
Battauz_2015_JStaSof	MTT	Me	1	0	0	0	Yes
Bechger_2015_Psych	MTT	Me	1	0	0	0	Yes
Bingenheimer_2005_JFamPsy	IRT	Me	5	0	0	0	Yes
Blais_2011_JAM	RMT	Me	1	1	0	0	Yes
Bohnke_2014_Assessm	MTT	Me	1	0	0	0	Yes
Bolt_2002_JEduMea	RMT	Me	7	0	0	0	Yes
Bolt_2014_JEduMea	IRT	Me	27	6	0	0	Yes
BondTN_2013_REcoSta	MTT	Me	0	9	0	0	Yes
Bramley_2013_RPapEdu	RMT	Me	0	2	0	0	Yes
BriggsDC_2013_JEBS_A	MTT	Me	3	26	3	0	Yes
Brock_2002_APMR	RMT	Me	0	6	0	0	Yes
Burro_2011_QaQ	RMT	Me	5	3	2	7	Yes
CaoM_2015_ORM	IRT	Me	1	0	0	0	Yes
Carle_2011_CIRes_A	MTT	Me	26	0	0	0	Yes
Carter_2014_JBusPsy	IRT	Me	2	0	0	0	Yes
ChangYW_2015_JEduMea	IRT	Me	3	0	0	0	Yes
ChenJH_2014_APsyMea	RMT	Me	2	0	0	0	Yes
Cheong_2013_AMeaEdu	RMT	Me	3	0	0	0	Yes
ChildsRA_2004_PARE	IRT	Me	14	0	0	0	Yes
Choi_2011_JStaSof	IRT	Me	4	0	0	0	Yes
ChoSJ_2013_JSComSim	MTT	Me	11	0	0	0	Yes
ChoSJ_2014_SEM	MTT	Me	4	0	0	0	Yes
Cipriani_2005_JAM	RMT	Me	1	0	0	0	Yes
Clark_2012_ORM	IRT	Me	1	0	0	0	Yes
CohenAS_2001_APsyMea_A	IRT	Me	1	0	0	0	Yes
Commons_2014_JAM_C	RMT	Me	2	2	0	0	Yes
CraigSB_2003_ORM	IRT	Me	5	1	0	0	Yes
DeBoeck_2005_PsyRev	IRT	Me	3	0	0	0	Yes
deJong_2012_MarSci	IRT	Me	0	2	0	0	Yes
DeMars_2004_AMeaEdu_A	IRT	Me	4	0	0	0	Yes
DeMars_2011_AMeaEdu	IRT	Me	16	0	0	0	Yes
DeMars_2012_APsyMea	IRT	Me	14	0	0	0	Yes
DeMars_2015_EaPM	MTT	Me	7	1	0	0	Yes
Devine_2015_QoLR	IRT	Me	4	0	0	0	Yes
Dietrich_2012_AICSP	MTT	Me	8	0	2	0	Yes
Dijkers_2003_APMR	RMT	Me	0	1	0	1	Yes
Dimitrov_2003_JAM_A	RMT	Me	1	0	0	0	Yes
DiStefano_2011_PsyAss	RMT	Me	3	5	0	0	Yes
Domingue_2014_Psych	MTT	Me	0	29	19	0	Yes
Dupuis_2015_FiP	IRT	Me	50	0	0	0	Yes
DuVernet_2014_ORM	IRT	Me	1	0	0	0	Yes
Edelen_2015_QoLR	IRT	Me	28	0	0	0	Yes
Farrokhi_2011_TPLanStu	RMT	Me	0	2	0	0	Yes
FoxC_2011_MPEES	RMT	Me	50	0	0	0	Yes
FoxCM_2013_InteracCom	RMT	Me	1	8	0	0	Yes
Franceschini_2015_QuaEng	RMT	Me	0	6	0	0	Yes
GaoF_2005_AMeaEdu	IRT	Me	1	0	0	0	Yes
Garrard_2015_BMCMRM	IRT	Me	1	0	0	0	Yes
Gittler_2011_JEBS	RMT	Me	1	2	0	0	Yes
Golia_2011_JASci	RMT	Me	0	2	0	0	Yes
Golia_2015_QaQ_B	MTT	Me	0	0	0	1	Yes
GonzalezBetanzos_2012_Methodo	IRT	Me	4	0	0	0	Yes
Grand_2014_PTAM	RMT	Me	29	1	0	0	Yes
Griffin_2005_SEduEva	RMT	Me	1	0	0	4	Yes
Grimm_2013_SEM	MTT	Me	3	3	0	0	Yes
Haley_2004_APMR_A	RMT	Me	3	0	0	0	Yes
Haley_2005_APMR	RMT	Me	2	0	0	0	Yes
HansonBA_2002_APsyMea	IRT	Me	1	0	0	0	Yes
Hartig_2012_EaPM	RMT	Me	1	0	0	0	Yes
Hastedt_2015_PARE	IRT	Me	3	0	0	0	Yes
Heene_2011_PTAM_B	MTT	Me	0	1	0	0	Yes
HidalgoMontesinos_2002_EaPM	IRT	Me	6	0	0	0	Yes
Huggins_2014_EaPM	IRT	Me	3	0	0	0	Yes
Humphry_2012_JAM	MTT	Me	14	0	0	0	Yes
Huo_2015_Psych	IRT	Me	7	0	0	0	Yes
JansenMGH_2005_Psych	RMT	Me	0	0	1	0	Yes
Jodoin_2003_JExpEdu	IRT	Me	17	0	0	0	Yes
Joreskog_2001_MulBehRes	IRT	Me	1	0	0	0	Yes
Jurich_2012_APsyMea	IRT	Me	9	0	0	0	Yes
Kabasakal_2015_ESTP	RMT	Me	1	0	0	0	Yes
Kang_2012_APERev	IRT	Me	1	0	0	0	Yes
KangSM_2005_APsyMea	IRT	Me	4	2	0	0	Yes
Karabatsos_2004_APsyMea	IRT	Me	0	1	1	0	Yes
Kaskowitz_2001_APsyMea	IRT	Me	30	0	0	0	Yes
KellerLA_2011_EaPM	IRT	Me	1	0	0	0	Yes
KellerLA_2015_AMeaEdu	IRT	Me	4	0	0	0	Yes
Kettler_2011_AMeaEdu	RMT	Me	6	0	0	0	Yes
Khadka_2012_IOVS	RMT	Me	3	3	0	0	Yes
Khalid_2014_Measur	IRT	Me	1	0	0	0	Yes
Kieftenbeld_2012_APsyMea	IRT	Me	2	0	0	0	Yes
KimJS_2002_APsyMea	IRT	Me	1	0	0	0	Yes
KimSH_2002_APsyMea	IRT	Me	63	0	0	0	Yes
KingJ_2003_JAM	RMT	Me	0	1	0	1	Yes
Kirisci_2001_APsyMea	IRT	Me	2	0	0	0	Yes
Kopf_2015_APsyMea_A	RMT	Me	3	0	0	0	Yes
Kopf_2015_EaPM_B	RMT	Me	1	0	0	0	Yes
Koskey_2013_JAM	RMT	Me	0	2	0	2	Yes
Koskey_2014_JMMetRes	RMT	Me	1	2	0	0	Yes
Kristoffersen_2015_SIR	RMT	Me	20	3	6	2	Yes
Krueger_2005_JAbnPsy	IRT	Me	1	0	0	0	Yes
Kyngdon_2004_JAM	RMT	Me	1	0	2	0	Yes
Kyngdon_2011_BJMSP_A	MTT	Me	0	2	30	0	Yes
Lajeunesse_2003_EcoLet	IRT	Me	7	0	0	0	Yes
Landauer_2011_SStuRea	MTT	Me	38	0	0	0	Yes
LeeWC_2002_APsyMea	IRT	Me	5	0	0	0	Yes
Levy_2015_JEduMea	IRT	Me	8	0	0	0	Yes
Liegl_2016_JCE	IRT	Me	79	0	0	0	Yes
Linacre_2002_JAM	RMT	Me	1	0	0	2	Yes
LiY_2005_APsyMea	IRT	Me	2	0	0	0	Yes
LiYH_2004_IJT_A	IRT	Me	20	0	0	0	Yes
LiYH_2004_JEduMea_B	IRT	Me	2	0	0	0	Yes
Massof_2005_OphEpi_C	MTT	Me	1	2	2	0	Yes
Massof_2014_SMMR	MTT	Me	0	2	0	0	Yes
Meade_2012_JAppPsy	IRT	Me	6	0	0	0	Yes
Meijer_2004_PsyMet	IRT	Me	0	1	0	0	Yes
Milanzi_2014_AnAppSta	RMT	Me	0	0	0	1	Yes
Morse_2012_APsyMea	IRT	Me	8	8	0	0	Yes
Moustaki_2003_BJMSP	IRT	Me	1	0	0	0	Yes
Mukherjee_2013_PTAM	IRT	Me	4	0	0	0	Yes
NavasAra_2002_EJPA	IRT	Me	1	0	0	0	Yes
Nurnadiah_2012_AMatSci_A	RMT	Me	0	5	0	0	Yes
Nurnadiah_2012_IJSofCom_B	RMT	Me	0	2	0	0	Yes
Odegaard_2014_POpeMan	IRT	Me	4	0	0	0	Yes
Ogasawara_2001_APsyMea_B	IRT	Me	1	0	0	0	Yes
Ogasawara_2003_Psych	IRT	Me	3	0	0	0	Yes
Ong_2013_IJRME	RMT	Me	0	2	0	0	Yes
Paek_2014_EaPM	IRT	Me	2	0	0	0	Yes
Pelton_2003_JAM	RMT	Me	0	3	3	3	Yes
Pendrill_2015_Measur	RMT	Me	5	2	0	0	Yes
Penfield_2004_JAM	MTT	Me	5	0	2	1	Yes
Perdices_2015_BraImp	RMT	Me	5	12	0	0	Yes
Perret_2011_CogDev	RMT	Me	1	0	0	0	Yes
RajuNS_2002_JAppPsy	IRT	Me	1	0	0	0	Yes
Reise_2003_PsyMet_B	IRT	Me	1	0	0	0	Yes
Reise_2005_JPerAss_B	IRT	Me	19	1	0	0	Yes
Roberts_2001_APsyMea	IRT	Me	1	0	0	0	Yes
Robie_2001_HumPer	IRT	Me	3	0	0	0	Yes
Rose_2012_PsychoMed	IRT	Me	7	0	0	0	Yes
Rouquette_2014_JCE	MTT	Me	0	13	0	0	Yes
Sabariego_2015_IJERPH_A	RMT	Me	19	0	0	0	Yes
SantosJRS_2013_JAppSta	IRT	Me	2	0	0	0	Yes
Seo_2013_JAM	RMT	Me	0	1	0	0	Yes
Seybert_2012_APsyMea	IRT	Me	2	0	0	0	Yes
Seybert_2014_APsyMea	IRT	Me	3	0	0	0	Yes
Sheng_2002_StaMed	RMT	Me	0	0	0	2	Yes
Shih_2014_EaPM	MTT	Me	3	0	0	0	Yes
Shojima_2003_Behavior	IRT	Me	1	0	0	0	Yes
Sideridis_2015_JPsyEdAss	IRT	Me	27	0	0	0	Yes
SmithJEV_2004_EaPM	RMT	Me	0	4	0	0	Yes
Stark_2002_APsyMea	IRT	Me	3	0	0	0	Yes
Stark_2004_JAppPsy	IRT	Me	9	0	0	0	Yes
Stark_2005_APsyMea	IRT	Me	4	0	0	0	Yes
Sudweeks_2004_AssWri	RMT	Me	2	6	0	0	Yes
Tate_2003_EaPM	IRT	Me	15	0	0	0	Yes
Tay_2011_ORM_B	IRT	Me	5	0	0	0	Yes
Tutz_2015_Psych	RMT	Me	4	0	0	0	Yes
VerhagenAJ_2013_BJMSP	IRT	Me	1	0	0	0	Yes
WangN_2012_IJT	RMT	Me	0	25	0	0	Yes
WangW_2013_APsyMea	IRT	Me	7	0	0	0	Yes
WangWC_2003_APsyMea	IRT	Me	1	0	0	0	Yes
WangWC_2004_EaPM_C	MTT	Me	0	7	0	0	Yes
WangWC_2004_JExpEdu_D	MTT	Me	4	1	0	0	Yes
WangWC_2012_EaPM	IRT	Me	12	0	0	0	Yes
Waugh_2005_JAM	RMT	Me	0	0	1	1	Yes
WelkenhuysenGybels_2004_QaQ	MTT	Me	2	0	0	0	Yes
WellsCS_2002_APsyMea	IRT	Me	8	0	0	0	Yes
WellsCS_2014_AMeaEdu	IRT	Me	7	0	0	0	Yes
Wiley_2015_PLOSONE	RMT	Me	7	0	0	0	Yes
Williamson_2013_EduRes	RMT	Me	0	0	1	0	Yes
Willse_2011_EaPM	RMT	Me	2	0	0	0	Yes
Wollack_2002_APsyMea	IRT	Me	2	0	0	0	Yes
Wollack_2003_JEduMea	MTT	Me	2	0	0	0	Yes
Woods_2013_EaPM	IRT	Me	5	0	0	0	Yes
WrightKD_2015_EaPM	MTT	Me	4	0	0	0	Yes
Wyse_2011_APsyMea_A	IRT	Me	1	0	0	0	Yes
Wyse_2011_APsyMea_B	IRT	Me	1	0	0	0	Yes
Wyse_2012_APsyMea	IRT	Me	28	0	0	0	Yes
XuT_2012_EaPM	IRT	Me	1	7	0	0	Yes
Yao_2011_APsyMea	IRT	Me	2	0	0	0	Yes
Ye_2014_EaPM	RMT	Me	1	0	0	0	Yes
Yildirim_2014_EduSci	IRT	Me	3	0	0	0	Yes
Yost_2011_JCE	IRT	Me	2	0	0	0	Yes
YuCH_2005_PARE	MTT	Me	4	0	0	0	Yes
Yusoff_2014_SAGEopen	MTT	Me	19	15	0	0	Yes
Zickar_2004_ORM	MTT	Me	0	1	0	0	Yes
Alonso_2013_HQoLO	IRT	Te	5	1	0	0	Yes
Amtmann_2011_APMR	IRT	Te	4	0	0	0	Yes
Arons_2013_ERPOR	RMT	Te	0	2	11	10	Yes
Baylor_2011_AJSLPat	MTT	Te	1	17	0	0	Yes
Beck_2001_JNurMea	MTT	Te	0	3	0	0	Yes
Boone_2011_SciEdu_B	RMT	Te	9	13	0	2	Yes
Cafiero_2014_ANYAS	RMT	Te	4	0	0	0	Yes
Cappelleri_2014_CliThe_A	MTT	Te	5	0	0	0	Yes
Carle_2011_ERPOR_B	IRT	Te	3	0	0	0	Yes
Cavanagh_2013_JRTecEdu	RMT	Te	0	2	0	0	Yes
Cella_2015_AmePsy	IRT	Te	10	0	0	0	Yes
CookKF_2005_HSRes_A	MTT	Te	9	0	0	0	Yes
Dampier_2014_SAJE	RMT	Te	0	0	0	8	Yes
daRocha_2013_JPsyRes	RMT	Te	4	4	1	0	Yes
Doig_2005_MEResJou	RMT	Te	0	1	0	0	Yes
Ewing_2005_JAdvert	RMT	Te	5	3	1	0	Yes
Franchignoni_2012_MedFlu_B	RMT	Te	0	5	0	0	Yes
GibbonsRD_2014_HSORM	IRT	Te	3	0	0	0	Yes
Glasgow_2013_AJPreMed	IRT	Te	3	0	0	0	Yes
Harpe_2015_CPTL	RMT	Te	0	10	0	4	Yes
Harwell_2001_REduRes	MTT	Te	0	80	0	0	Yes
Hobart_2002_CONeu	MTT	Te	1	5	0	1	Yes
Hobart_2003_JNeuNeuPsy	MTT	Te	0	4	0	1	Yes
Houran_2004_NAJPsy_A	RMT	Te	0	2	0	0	Yes
Kucukdeveci_2011_JRehMed	RMT	Te	2	7	0	0	Yes
Lissitz_2003_PARE	IRT	Te	0	2	0	0	Yes
Lovelace_2013_CBELSE	MTT	Te	2	8	0	1	Yes
Markon_2013_PsyMet	IRT	Te	5	0	0	0	Yes
Markward_2004_JAM_B	RMT	Te	23	1	0	4	Yes
Masse_2002_AJPreMed	IRT	Te	1	0	0	0	Yes
Massof_2001_VisRes_B	MTT	Te	0	20	0	0	Yes
Massof_2002_OptViSci	MTT	Te	3	23	4	0	Yes
Massof_2011_OphEpi	MTT	Te	0	6	3	0	Yes
Massof_2013_OptViSci	RMT	Te	0	3	0	0	Yes
McGrane_2015_FiP	IRT	Te	0	4	0	2	Yes
Mettler_2011_IJHISInf	RMT	Te	1	0	0	0	Yes
Michell_2003_SSInf_B	RMT	Te	0	0	12	4	Yes
Neal_2013_TJEcoEdu	IRT	Te	14	0	0	0	Yes
NguyenTH_2014_Patient	MTT	Te	1	0	0	0	Yes
PrietoG_2014_Psicologica	RMT	Te	2	4	1	0	Yes
Reeve_2003_ERPOR	MTT	Te	10	1	0	0	Yes
Reise_2003_JPerAss_A	MTT	Te	7	1	0	0	Yes
Reise_2005_CDPSci_A	IRT	Te	4	4	0	0	Yes
Roberts_2003_BRMIC	IRT	Te	19	0	0	0	Yes
Rupp_2002_IJT	MTT	Te	0	0	2	1	Yes
Salzberger_2013_FiP_A	MTT	Te	2	0	2	0	Yes
Salzberger_2013_JBusRes_B	RMT	Te	1	1	0	0	Yes
Seawright_2014_CPolStu	MTT	Te	0	4	0	0	Yes
Seel_2012_APMR	IRT	Te	0	4	0	0	Yes
Siemons_2014_CERheu	MTT	Te	3	1	0	0	Yes
SmithJEV_2001_JAM_A	RMT	Te	4	5	0	0	Yes
Svensson_2001_StaMed	IRT	Te	7	3	0	0	Yes
Tavakol_2012_MedTea	RMT	Te	0	1	0	0	Yes
Tay_2015_ORM	IRT	Te	21	0	0	0	Yes
Tennant_2004_ViH_B	RMT	Te	2	3	3	4	Yes
Teo_2011_BJEduTec	RMT	Te	0	2	0	0	Yes
Tesio_2003_JRehMed	RMT	Te	6	2	0	0	Yes
Tesio_2004_JAM	RMT	Te	2	0	0	0	Yes
ThompsonM_2003_IEduJou	RMT	Te	0	2	0	0	Yes
ThompsonNA_2011_PARE	IRT	Te	2	0	0	0	Yes
Vanhoutte_2015_JPNS	RMT	Te	4	7	0	0	Yes
Velozo_2012_APMR	MTT	Te	1	3	0	0	Yes
WareJE_2003_APMR	IRT	Te	16	0	0	0	Yes
Wendt_2011_EduResEva	MTT	Te	0	0	0	1	Yes
WilsonM_2013_Measur	MTT	Te	2	0	0	0	Yes
ZhuW_2011_MPEES_B	MTT	Te	33	0	0	0	Yes
Abad_2004_PID	IRT	A	3	0	0	0
AbdElFattah_2014_AJEDP	RMT	A	3	1	0	0
Abe_2015_AJO	RMT	A	1	0	0	0
AdamsJW_2011_JGPsy	RMT	A	0	5	1	0
Adanez_2004_JGeoGra	RMT	A	0	1	0	1
Adler_2011_NJPsy	MTT	A	0	2	0	0
AfamasagaFuatai_2014_JMatTEdu	RMT	A	0	2	0	1
Afrassa_2001_IEduJou	RMT	A	1	1	0	0
Ahn_2015_EHP	RMT	A	0	2	0	0
Alcala_2004_IBDis	RMT	A	1	0	0	0
Alderman_2012_NeupsyReh	RMT	A	0	9	0	0
Aldridge_2012_JSTeaEdu	RMT	A	0	1	0	0
Alguren_2011_TStrReh	RMT	A	0	8	0	0
Allison_2011_PID	RMT	A	0	2	2	0
Allison_2015_SJP	RMT	A	0	1	0	0
Alquraan_2011_EBSCMEI	RMT	A	0	1	0	0
Alquraan_2014_EBSCMEI	RMT	A	0	2	0	0
AmreinBeardsley_2012_EAEvaAcc	RMT	A	0	0	1	0
Anatchkova_2011_QoLR	IRT	A	2	0	0	0
AndersonD_2011_EduAss	RMT	A	1	0	0	0
AndersonD_2015_EMIP	RMT	A	0	2	0	0
Anselmi_2013_PLOSONE	RMT	A	0	2	0	0
Anselmi_2015_HQoLO	RMT	A	0	5	0	0
Anshel_2013_PsySpoExe	RMT	A	0	5	0	0
Antonucci_2002_APMR	RMT	A	1	4	0	5
Apple_2012_JAM	RMT	A	0	1	0	0
AriasGonzalez_2015_HQoLO	RMT	A	1	0	0	0
Arnould_2012_BMJOp	RMT	A	9	0	0	0
Arthurs_2015_JGeoEdu	RMT	A	1	0	0	0
Aryadoust_2011_APJE_A	RMT	A	0	1	0	0
Aryadoust_2012_IJLis_A	RMT	A	0	2	0	0
Aryadoust_2015_PTAM_B	RMT	A	3	0	0	0
Athanasou_2004_AJEDP	RMT	A	0	1	0	0
Athanasou_2014_AJRC	RMT	A	0	1	0	0
BabcockParziale_2005_JRRD	RMT	A	1	2	0	0
Bacon_2005_JManEdu	RMT	A	0	3	0	0
Baghaei_2014_SAGEopen_B	RMT	A	2	3	0	0
Bakhsh_2014_AnSauMed_A	RMT	A	2	0	0	0
Bakhsh_2014_IJRehRes_B	RMT	A	5	0	0	0
Ballert_2015_APMR	RMT	A	2	1	0	0
Balsamo_2014_NeupsyDT	RMT	A	1	3	0	0
Bansilal_2015_SAJS	RMT	A	0	1	0	0
Barbot_2012_TSC	RMT	A	0	0	1	0
Barghaus_2014_EED	IRT	A	1	0	0	0
Barker_2013_TStrReh	RMT	A	1	7	1	0
Barnes_2012_RHigEdu	RMT	A	0	1	0	0
Barthel_2014_JAffDis	RMT	A	7	0	0	0
Barthel_2015_JAffDis	RMT	A	5	0	0	0
BartramDJ_2013_QoLR	RMT	A	0	33	0	0
Basra_2015_Dermat	RMT	A	0	1	0	0
Batcho_2012_Stroke	RMT	A	5	8	0	0
Bates_2013_BMCNeuro	RMT	A	0	0	0	1
Becker_2012_JEduPsy	RMT	A	4	0	0	0
Beckmann_2015_JSES	RMT	A	0	3	0	0
Bedell_2004_NeuroReh	RMT	A	2	0	0	0
Beggrow_2014_JSEduTec	RMT	A	4	2	0	0
Behmke_2013_CERP	IRT	A	19	0	0	0
Bejerholm_2015_HQoLO	RMT	A	4	7	0	0
Beltyukova_2002_JCStuDev	RMT	A	6	3	0	11
Beltyukova_2004_JAM	RMT	A	7	0	0	0
Benedetti_2014_IJRehRes	RMT	A	3	0	0	0
Bergersen_2014_IEEETSE	RMT	A	0	3	2	0
Beswick_2012_JMatTEdu	RMT	A	0	1	0	0
Betemps_2003_JAM	RMT	A	1	8	0	1
Betemps_2004_MHSRes	RMT	A	1	12	0	0
Bezaiczko_2012_JAM	RMT	A	0	2	0	0
Bezruczko_2003_JAM	RMT	A	4	4	0	0
Bezruczko_2011_JAM_A	RMT	A	0	2	0	0
Bezruczko_2011_JPPIDis_B	RMT	A	0	8	0	0
Bhakta_2005_BMCMedEdu	RMT	A	2	1	0	0
Bianchi_2011_ActaPsy_A	RMT	A	4	1	1	0
Bjorkdahl_2004_JSCerDis	RMT	A	0	8	0	0
Bjorner_2003_QoLR_A	IRT	A	2	0	0	0
Bjorner_2003_QoLR_C	IRT	A	19	0	0	0
Bjorner_2004_QoLR	IRT	A	4	0	0	0
Bjorner_2014_QoLR	IRT	A	3	0	0	0
Blackman_2003_IEduJou	RMT	A	0	0	2	0
Blackman_2015_WEBN_B	RMT	A	0	3	0	0
Bode_2002_APMR	RMT	A	0	4	0	0
Bode_2003_APMR_A	RMT	A	1	0	0	0
Bode_2003_ArthCR_B	RMT	A	0	1	0	0
Bode_2003_JAM_C	RMT	A	1	0	0	0
Boffo_2014_TPM	RMT	A	4	1	0	0
BondTG_2003_JAM_A	RMT	A	0	1	0	1
Bonsaksen_2013_HQoLO	RMT	A	1	3	0	0
Boon_2014_NatHaz	RMT	A	0	1	0	0
Boon_2015_IJEdR	RMT	A	1	6	0	0
Boone_2011_IJSMatEdu_A	RMT	A	6	0	0	0
Borsci_2015_IJHCI	IRT	A	12	0	0	0
Bostan_2014_JRehMed	RMT	A	0	4	0	0
Bradley_2014_JHapStu	RMT	A	0	1	0	0
Bravini_2014_DisHeaJ	RMT	A	3	0	0	0
Bravini_2015_APMR	RMT	A	1	1	0	0
BriggsAL_2005_RSAPha	RMT	A	0	2	0	0
Brinthaupt_2014_Assessm	RMT	A	2	1	0	0
Brizuela_2013_RELIEVE	RMT	A	1	0	0	0
Brogardh_2013_PMaR	RMT	A	0	4	0	0
BrownNA_2014_FLanAnn	RMT	A	0	12	0	0
BrownT_2011_BJOccThe_A	RMT	A	0	6	0	0
BrownT_2011_OTJROPH_B	RMT	A	0	8	0	0
BudimanMak_2013_JFooAnkR	MTT	A	15	0	0	0
Burdick_2013_LResIns	RMT	A	0	3	1	0
Burton_2003_AJHBio	RMT	A	0	3	0	0
CabreroGarcia_2012_HQoLO	RMT	A	1	0	0	0
Cadime_2014_AnaPsi	RMT	A	3	0	1	0
Caines_2012_JNegEdu	RMT	A	0	1	0	0
Callingham_2004_MEResJou	RMT	A	1	0	0	0
Camargo_2011_JDesRes	RMT	A	1	2	0	1
Camargo_2015_JED	RMT	A	2	3	0	0
Caracuel_2012_BraInj_A	RMT	A	1	0	0	0
Caracuel_2012_NeuroReh_B	RMT	A	0	0	0	1
Caricati_2013_TPM	RMT	A	3	0	0	0
Carlson_2013_JAM	RMT	A	1	1	0	1
Caronni_2014_RDevDis	RMT	A	2	16	0	5
Carpita_2012_QaQ	RMT	A	0	1	0	0
Carson_2015_IJSLP	RMT	A	0	1	0	0
CarvalhoLdF_2012_TPsyPsy	RMT	A	5	0	0	0
CarvalhoLdF_2014_APLatam	RMT	A	2	1	0	0
CarvalhoT_2015_JAD	RMT	A	2	0	0	0
Cavanagh_2015_LER	RMT	A	1	2	0	0
Cavendish_2013_SPsyEdu	RMT	A	0	1	0	0
Cella_2014_QoLR	IRT	A	11	0	0	0
ChanDW_2012_IJDDEdu	RMT	A	0	4	0	0
ChangCC_2015_JCE	RMT	A	0	1	0	0
ChangHL_2012_AAnaPre	RMT	A	0	6	0	0
ChangKY_2011_AneAna	RMT	A	0	2	0	0
ChangYC_2013_AJOT	RMT	A	1	1	0	0
ChanRCK_2005_BraInj	RMT	A	1	1	0	0
ChanTL_2015_APMR	RMT	A	0	10	0	0
ChaoC_2014_IOVS	RMT	A	0	3	0	0
ChaoRCL_2013_PsyAss	RMT	A	0	3	0	0
Cheifetz_2014_CuOnc	RMT	A	4	14	0	0
Chemolli_2014_PsyAss	RMT	A	0	2	0	0
ChenCC_2005_AJPMReh	RMT	A	1	1	0	0
ChengHua_2012_TouMan	RMT	A	0	4	0	0
ChengYH_2011_Ergonom_A	RMT	A	0	2	0	0
ChengYH_2011_TRPCET_B	RMT	A	0	4	0	0
ChengYH_2012_TRPAPP	RMT	A	0	6	0	0
ChengYH_2014_TranRev	RMT	A	0	7	0	0
ChenH_2012_PT	RMT	A	0	2	0	0
ChenHF_2013_NeureNR	RMT	A	0	1	0	0
ChenHF_2014_NeureNR	RMT	A	1	1	0	0
ChenLM_2012_EduPsy	RMT	A	0	1	0	0
ChenLM_2015_EduPsy_A	RMT	A	0	14	0	0
ChenLM_2015_JSH_B	RMT	A	0	7	0	0
ChenSK_2013_SIR	IRT	A	2	0	0	0
ChenTA_2015_Appetite	RMT	A	0	1	0	0
ChenYL_2015_JFMA	RMT	A	0	3	0	0
Chew_2012_AJO	RMT	A	0	1	0	0
Chiang_PPC_2011_IOVS	RMT	A	0	2	0	0
ChienCW_2011_JRehMed_A	RMT	A	0	1	0	0
ChienCW_2011_RDevDis_B	RMT	A	1	5	0	0
ChienCW_2012_RDevDis_B	RMT	A	0	1	0	0
ChienTW_2011_BMCPH_A	RMT	A	0	2	0	0
ChienTW_2011_PsyOnc_B	RMT	A	0	13	0	0
ChienTW_2012_HealthMED	RMT	A	1	2	0	0
Chiesi_2012_LID_A	IRT	A	5	0	0	0
Chiesi_2012_PsyAss_B	IRT	A	2	0	0	0
ChiuEC_2015_PLOSONE_A	RMT	A	0	2	0	0
Choi_2014_PsyAss	IRT	A	39	0	0	0
ChoSJ_2015_PsyAss	IRT	A	0	1	0	0
ChoYH_2015_APJE	RMT	A	11	0	0	0
Chung_2014_QoLR	IRT	A	12	0	0	0
Ciesla_2011_SAResTre	RMT	A	5	2	0	0
Cieza_2015_IJE_A	RMT	A	26	0	0	0
Cieza_2015_PLOSONE_B	RMT	A	37	0	0	0
Cinamon_2011_IJGerPsy	RMT	A	2	2	0	0
Classen_2012_AJOT	RMT	A	0	4	0	0
Classen_2013_AJOT	RMT	A	0	3	0	0
Clifford_2013_FLanAnn	RMT	A	0	12	0	0
CohenAS_2001_ExcChi_B	IRT	A	55	0	0	0
Cole_2012_ZDM	RMT	A	2	0	0	0
Colom_2013_Intelli	IRT	A	3	0	0	0
Comer_2011_Spine	RMT	A	0	1	0	0
Commons_2012_IJLawPsy	RMT	A	1	0	0	0
Commons_2014_BDB_B	RMT	A	0	2	0	0
Connell_2004_JNutri	RMT	A	5	0	0	0
ConradKJ_2011_TGeron	RMT	A	0	1	0	1
ConradKJ_2012_PsyAss	RMT	A	3	1	0	1
ConradKM_2015_ERev	RMT	A	2	4	0	2
CookKF_2001_SSMed	RMT	A	5	66	0	0
CookKF_2003_MedCar	RMT	A	4	0	0	0
CookKF_2005_JSES_B	RMT	A	4	0	0	0
CookKF_2012_QoLR	IRT	A	7	3	0	0
CookKF_2015_QoLR_A	IRT	A	8	0	0	0
CookKF_2015_QoLR_B	IRT	A	28	0	0	0
Cooper_2015_EduStu	RMT	A	0	3	0	0
Cordier_2013_IJSLP	RMT	A	0	3	0	0
Coster_2004_APMR	RMT	A	1	0	0	0
Court_2014_JAffDis	RMT	A	0	8	0	0
Covic_2012_BMCPsych	RMT	A	17	2	0	0
Coxon_2015_TRRec	RMT	A	0	2	0	0
Crandal_2015_PsyAss	RMT	A	0	1	0	0
Crescioni_2014_OptViSci	RMT	A	0	4	0	0
Cress_2014_JEarInt	RMT	A	1	0	0	0
Cruickshank_2015_IJRME	RMT	A	0	1	0	0
Cruz_2015_ActaReuPor	RMT	A	0	1	0	0
Dadey_2012_PARE	MTT	A	3	2	0	0
Dalton_2011_JPhysiothe	RMT	A	0	5	0	0
Davey_2013_PLOSONE	RMT	A	0	3	0	0
Davis_2011_JAM	RMT	A	0	1	0	0
DawsonTunik_2002_IJBehDev_B	RMT	A	3	4	2	0
DawsonTunik_2002_JAM_A	RMT	A	2	1	0	0
DawsonTunik_2003_CogDev_A	RMT	A	0	1	0	0
DawsonTunik_2004_GSGPM	RMT	A	2	6	0	0
DawsonTunik_2005_EJDPsy	RMT	A	0	6	0	0
deBruin_2005_SAJP	RMT	A	0	1	0	0
deBruin_2013_SAJIP	RMT	A	0	0	0	1
deKlerk_2013_SAJIP	RMT	A	0	3	0	0
DeMars_2004_JAM_B	RMT	A	4	0	0	0
Dencker_2015_HQoLO	RMT	A	2	11	0	0
Deneen_2013_APJTeaEdu	RMT	A	0	1	0	0
Denehy_2013_PT	RMT	A	0	16	0	0
Deng_2015_QoLR	IRT	A	1	0	0	0
Densley_2013_QoLR	RMT	A	2	0	0	0
deQueiroz_2013_EstuPsic	RMT	A	19	0	0	0
Desouza_2004_SciEdu	RMT	A	2	0	0	0
diGennaro_2013_AssWri	RMT	A	0	10	0	0
Dillard_2013_PDTRT	IRT	A	3	0	0	0
Ding_2014_PRSTPER	RMT	A	0	5	0	0
DiPietro_2014_PT	RMT	A	0	3	0	0
DiStefano_2014_JEarInt	RMT	A	4	3	0	0
Djaja_2014_HQoLO	RMT	A	1	2	0	0
DoganayErdogan_2015_IJRheDis_A	RMT	A	25	2	0	1
DoganayErdogan_2016_JRheu_B	RMT	A	24	16	0	0
Dougherty_2011_IOVS	RMT	A	0	1	0	0
Doyle_2005_JSLHR	RMT	A	1	10	0	0
Dragoi_2013_ArthResThe	RMT	A	0	2	0	0
Drouin_2012_ECRQ	RMT	A	1	7	0	0
Duke_2015_Patient	RMT	A	1	0	0	0
Dumond_2003_JAM	RMT	A	0	8	0	0
Dunbar_2012_OPhyOpt	RMT	A	0	2	0	0
Duncan_2003_APMR	RMT	A	0	4	0	0
Dunn_2014_AJOT	RMT	A	1	3	0	0
DuPlessis_2015_JPsyAfr	RMT	A	0	2	0	0
Dye_2013_PT	RMT	A	0	3	0	0
Eakman_2012_AJOT	RMT	A	0	2	1	0
Eakman_2015_JOccSci	RMT	A	0	0	2	0
Eckes_2005_LAssQua	RMT	A	0	2	0	0
Eckes_2012_LAssQua_A	RMT	A	0	1	0	0
Edelen_2014_CliThe	IRT	A	7	0	0	0
Edmonds_2012_JSLHR	RMT	A	0	10	0	0
Edmonds_2014_BResMet	RMT	A	1	12	0	0
Egerton_2015_QoLR	MTT	A	1	0	0	0
Ekbladh_2014_Work	RMT	A	0	1	0	0
Ekstrand_2014_PMaR	RMT	A	0	2	0	0
Elbaum_2011_JAM	RMT	A	2	0	0	0
Elbaum_2014_JDisPoSt	RMT	A	32	0	0	0
Elhai_2011_JAD	RMT	A	1	2	0	0
Emenogu_2005_CJEdu	IRT	A	1	0	0	0
Engelhard_2012_JAM	RMT	A	1	0	0	0
Englund_2014_Assessm	RMT	A	0	2	0	0
Epstein_2015_JCE	IRT	A	8	0	0	0
Estabrook_2015_PsyAss	IRT	A	2	0	0	0
Estrada_2011_MilPsy	IRT	A	6	0	0	0
Evans_2014_JSLanWri	RMT	A	3	1	0	0
Facteau_2001_JAppPsy	IRT	A	5	0	0	0
Fallahpour_2011_OTJROPH_A	RMT	A	0	2	0	0
Fallahpour_2014_JRehMed	RMT	A	0	4	0	0
Fallahpour_2015_SJOT	RMT	A	0	3	0	0
Fan_2013_OTJROPH	RMT	A	0	4	0	0
Farin_2011_PEduCou	RMT	A	0	1	0	0
Farin_2012_PEduCou	RMT	A	0	1	0	0
Farin_2013_HQoLO_A	RMT	A	0	1	0	0
Farin_2013_PEduCou_C	RMT	A	0	1	0	0
Farin_2014_QoLR_B	IRT	A	0	1	0	0
Fenwick_2013_PLOSONE	RMT	A	0	3	0	0
Fieo_2011_BMCGer	MTT	A	1	16	0	0
Filgueiras_2013_EHumDev	RMT	A	8	0	0	0
Finger_2011_HQoLO_A	RMT	A	0	2	0	0
Finger_2011_IOVS_B	RMT	A	0	1	0	0
Finger_2011_IOVS_C	RMT	A	0	3	0	0
Finger_2012_Ophtalmo	RMT	A	0	1	0	0
FischerHF_2012_MedCar	IRT	A	0	2	0	0
FischerHF_2014_QoLR	IRT	A	5	0	0	0
FitzpatrickAR_2001_AMeaEdu	IRT	A	6	0	0	0
FitzpatrickR_2003_JCE	RMT	A	1	2	0	0
FitzpatrickR_2004_QoLR	RMT	A	1	1	0	0
Fliege_2005_QoLR	IRT	A	2	0	0	0
Ford_2003_JHHSAdm	RMT	A	0	1	0	0
Forero_2014_JCE	IRT	A	5	0	0	0
Forget_2014_BMCMusDis	RMT	A	0	2	0	0
Forkmann_2013_JAffDis_A	RMT	A	0	1	0	0
Fortinsky_2003_MedCar	RMT	A	0	5	0	0
Fortus_2014_JRST_B	RMT	A	0	2	0	0
Franchignoni_2011_ManThe	RMT	A	2	0	0	0
Franchignoni_2012_CliRheu_A	RMT	A	3	0	0	0
Franchignoni_2013_JNeuNeuPsy_B	RMT	A	12	0	0	0
Franchignoni_2014_JRehMed_B	RMT	A	1	0	0	1
Franchignoni_2015_ALSFD_A	RMT	A	6	0	0	4
Franchignoni_2015_EJPRM_B	RMT	A	5	3	0	0
Franchignoni_2015_JRehMed_C	RMT	A	2	0	0	0
FredrikssonLarsson_2015_JNurMea	RMT	A	6	10	0	0
Fujino_2015_JOccHea	RMT	A	0	3	0	0
Fulmer_2015_IJSMatEdu_A	RMT	A	1	0	0	0
Fulmer_2015_JAM_B	RMT	A	0	1	0	0
Gabales_2011_JCogPsy	RMT	A	2	3	0	1
Gallegos_2011_CPTL	RMT	A	0	3	1	4
GanglmairWooliscroft_2013_JBusRes	RMT	A	0	1	0	0
Garner_2015_JAM	RMT	A	0	1	0	0
Gauggel_2004_RehPsy	RMT	A	2	2	0	0
Gerber_2002_JAM	RMT	A	4	0	0	0
Gerrard_2013_APMR	IRT	A	2	2	0	0
Gershon_2012_QoLR	IRT	A	2	0	0	0
GibbonsCJ_2011_HQoLO	RMT	A	2	2	0	0
GibbonsCJ_2013_ALSFD_A	RMT	A	0	1	0	0
GibbonsCJ_2013_JNeuroSci_B	RMT	A	0	6	0	0
GibbonsCJ_2013_PLOSONE_C	RMT	A	0	7	0	1
GibbonsLE_2011_QoLR	IRT	A	27	0	0	0
GijonNogueron_2014_QoLR	RMT	A	0	5	0	0
Gilbert_2015_POQ	IRT	A	5	0	0	0
Giri_2014_BDB	RMT	A	0	2	0	0
Glad_2014_RSWP	RMT	A	0	6	0	1
Glenny_2012_APMR	RMT	A	0	4	0	0
Glynn_2012_JRST	RMT	A	0	16	2	0
Gnambs_2014_EJPA	IRT	A	2	0	0	0
Goedert_2012_APMR	RMT	A	0	3	0	0
Goldstein_2015_JAMAOph	RMT	A	0	4	0	0
Golia_2014_EJASA	RMT	A	0	0	0	1
Golino_2014_BDB	RMT	A	7	6	0	2
GomezLE_2012_JIDevDis	RMT	A	1	2	1	0
GonzalezdePaz_2012_JCliNur	RMT	A	1	2	0	0
Goodwin_2012_LanTes	RMT	A	0	3	0	0
Gothwal_2011_CEOpt_A	RMT	A	0	2	0	0
Gothwal_2011_JCRefSur_B	RMT	A	0	2	0	0
Gothwal_2012_IOVS_A	RMT	A	5	1	0	0
Gothwal_2012_OphEpi_B	RMT	A	0	2	0	0
Gothwal_2012_OptViSci_C	RMT	A	0	4	0	0
Gothwal_2013_IOVS_A	RMT	A	0	8	0	2
Gothwal_2013_IOVS_B	RMT	A	0	2	0	0
Gothwal_2013_QoLR_C	RMT	A	0	9	0	0
Gothwal_2014_JAffDis	RMT	A	1	8	0	0
Gothwal_2015_IOVS_A	RMT	A	0	1	0	0
Gothwal_2015_PLOSONE_B	RMT	A	0	3	0	0
Gothwal_2015_PLOSONE_C	RMT	A	0	3	0	0
Graham_2015_JPAssEdu	RMT	A	0	6	0	0
Graticelli_2015_JAMAOph	RMT	A	1	0	0	0
Graves_2004_JAM_A	RMT	A	1	5	1	0
Greaves_2013_DMCN	RMT	A	0	5	0	0
Greene_2015_APMR	RMT	A	1	2	0	0
Grijalva_2015_PsyBul	IRT	A	3	0	0	0
Grill_2013_JVesRes	RMT	A	0	0	1	0
Grimfors_2014_JCRefSur	RMT	A	0	2	0	0
Gross_2015_ResAgi_B	IRT	A	11	1	0	0
Grossschedl_2014_IJSE	RMT	A	1	2	0	0
Guillemin_2012_OcuSur	RMT	A	4	1	0	0
Guillen_2015_AnaPsi	RMT	A	1	1	0	0
Gutheil_2011_JPsyLaw	RMT	A	0	1	0	0
Haans_2012_ActaPsy_A	RMT	A	1	0	0	0
Haans_2014_JEnvPsy	RMT	A	0	2	0	0
Hadley_2013_Neurosur	MTT	A	1	0	0	0
Hadzibajramovic_2015_BMCPH_A	RMT	A	2	2	1	0
Hadzibajramovic_2015_SJPH_B	RMT	A	22	0	0	0
Hagell_2003_MovDis	RMT	A	2	0	0	1
Haggerty_2011_HPol	IRT	A	3	0	0	0
HahnEA_2005_EHP	RMT	A	0	2	0	0
Haley_2004_APMR_B	RMT	A	5	0	0	0
Haley_2011_APMR	IRT	A	9	0	0	0
Hamilton_2015_HQoLO	RMT	A	0	12	0	0
Hammond_2015_Rheu	RMT	A	2	4	1	0
Handa_2004_NeuUro	RMT	A	0	15	0	0
Hansen_2014_IJTheReh	RMT	A	0	4	0	1
Harder_2014_HiAbStu	RMT	A	0	1	0	0
Hardigan_2015_JAM	RMT	A	2	0	0	0
Haroz_2014_JAffDis	IRT	A	5	0	0	0
HarrisHaywood_2014_MedCar	RMT	A	1	0	0	0
HartDL_2005_JCE	RMT	A	1	0	0	0
Hasford_2011_JABusRes	RMT	A	0	1	0	0
Hawthorne_2014_JCE	RMT	A	0	0	0	2
Hays_2015_JGIM	IRT	A	3	0	0	0
Hecimovich_2014_BMCRN_A	RMT	A	0	0	1	0
Hecimovich_2014_PsySpoExe_B	RMT	A	0	1	0	0
Heinemann_2015_JSCM	IRT	A	7	0	0	0
Hendriks_2012_AMedJou	RMT	A	0	15	0	3
Hermans_2013_MusNer	RMT	A	1	6	0	0
Hermansson_2005_JRehMed	RMT	A	1	0	0	0
HerrmannAbell_2011_CERP	RMT	A	0	1	0	0
Hibbard_2004_HSRes	RMT	A	3	4	0	0
Hickman_2004_JCriJus	RMT	A	0	1	1	4
Hillege_2011_TIJFMHea	IRT	A	10	0	0	0
HillTM_2013_JAOffCou	RMT	A	0	0	0	3
Hincapie_2012_PhaPra	RMT	A	0	1	0	0
Hincapie_2015_JMCP	RMT	A	0	1	0	0
Hissbach_2011_BMCMedEdu	RMT	A	0	1	1	1
Hlavinkova_2014_IJPubHea	RMT	A	0	2	0	0
HoFC_2014_EduPsy	RMT	A	0	2	0	0
Hoffman_2012_JSLHR	IRT	A	9	0	0	0
Hollar_2012_JAM	RMT	A	0	1	0	0
Holloway_2014_JAdvNur	RMT	A	0	0	2	0
Holmefur_2015_QoLR	RMT	A	0	2	0	0
Homer_2012_AEHEdu	RMT	A	0	0	1	0
Hong_2005_EaPM	RMT	A	2	0	0	0
Hossain_2014_IEEEAcc	RMT	A	3	0	0	0
Hostetler_2012_JGLBTFS	RMT	A	1	0	0	0
HsiehM_2013_LanTes	RMT	A	0	1	0	0
HuangJH_2011_JGreSys	RMT	A	0	2	0	0
HuangJH_2012_TouMan	RMT	A	0	2	0	0
Hubert_2015_RDevDis	RMT	A	1	0	0	0
Huberty_2013_PsySpoExe	RMT	A	6	0	0	0
Huggins_2013_EduAss	IRT	A	2	0	0	0
HungM_2012_FooAnkInt	RMT	A	4	0	0	0
HungM_2013_QoLR	RMT	A	0	3	0	0
HungM_2014_FooAnkInt_B	RMT	A	3	7	0	0
HungM_2014_OJSpoMed_C	RMT	A	0	3	0	0
HungM_2015_SpiJou	RMT	A	1	8	0	0
Inchausti_2014_RPSalMen	RMT	A	1	1	0	0
Iris_2014_JEAbuNeg	RMT	A	0	1	0	1
Isacsson_2012_ActaPsySca	RMT	A	0	1	0	0
Iwai_2011_JPTS	RMT	A	0	6	0	0
Jackson_2003_AJPhaEdu	RMT	A	0	2	0	0
Jackson_2005_AJPhaEdu	RMT	A	0	3	0	0
Jain_2015_Spine	RMT	A	0	5	0	0
Jalbert_2015_COphRep	RMT	A	0	8	0	0
JanssenG_2015_AssWri	RMT	A	0	1	0	0
Jarl_2015_APMR	RMT	A	0	2	0	0
Jervaeus_2013_HQoLO	RMT	A	0	2	0	0
Ji_2013_JHomosex	RMT	A	1	2	0	0
JiangJY_2015_EduRes	RMT	A	9	0	0	0
Johansson_2014_HQoLO	RMT	A	0	6	0	0
JohnsonP_2011_JRST	RMT	A	0	2	0	0
JohnsonP_2013_EduQui	RMT	A	0	3	0	0
Johnston_2005_JSCM	RMT	A	0	2	0	0
Jolly_2012_SARhe	RMT	A	1	0	0	0
JonesMG_2013_IJSE	RMT	A	37	0	0	0
JonesS_2014_JAfrEco	RMT	A	2	0	0	0
Joosten_2012_JARIDis	RMT	A	0	3	0	0
Jorion_2015_JEngEdu	IRT	A	3	0	0	0
Jung_2015_SEduEva	RMT	A	3	1	0	1
Juttner_2013_EAEvaAcc	RMT	A	0	2	0	1
Kahler_2004_PAddBeh	RMT	A	3	10	0	0
Kahler_2005_ACER	RMT	A	3	8	0	0
Karim_2014_IEduStu	RMT	A	0	3	0	0
Kean_2011_JHTraReh	RMT	A	0	7	0	1
Kelly_2015_DMCN	RMT	A	0	2	0	0
Kent_2015_JRehMed	RMT	A	1	2	0	0
Kersten_2011_EBCAM	RMT	A	0	3	0	2
Kersten_2012_DisReh	RMT	A	1	12	0	0
Khadka_2011_IOVS	RMT	A	0	6	0	0
Khadka_2013_OptViSci	RMT	A	1	26	0	0
Khadka_2014_IOVS	RMT	A	7	3	0	0
Khan_2014_IJMPsyRes	RMT	A	0	1	0	0
KhanA_2013_JCE	RMT	A	1	12	0	0
Kieffer_2011_AEResJou	IRT	A	3	1	0	0
Kieffer_2012_APsycholin	RMT	A	2	0	0	0
KimHe_2015_JAM	RMT	A	0	2	0	0
KimSe_2014_WaCJ_B	RMT	A	0	1	0	0
KingJ_2002_CHumBeh	RMT	A	0	2	0	1
Kirchberger_2014_PHM	RMT	A	13	1	0	0
Kisala_2015_JSCM_A	IRT	A	10	0	0	0
Kisala_2015_JSCM_B	IRT	A	6	0	0	0
Klassen_2015_HeaExp	RMT	A	0	2	0	0
KlineTL_2005_JAM	RMT	A	0	0	2	0
Knisely_2015_JAM	RMT	A	1	0	0	0
KollerB_2011_Work	RMT	A	0	3	0	0
Konsztowicz_2011_IPsychoger	RMT	A	0	1	0	0
Koparan_2014_EJEduRes	RMT	A	2	3	0	0
Koparan_2015_IJMEST	RMT	A	0	1	0	0
Korpershoek_2015_JAM	RMT	A	0	1	0	0
Kortge_2013_BehCha	RMT	A	0	3	1	1
Kottorp_2003_AOTJ_A	RMT	A	0	2	0	0
Kottorp_2003_JIDisRes_B	RMT	A	0	1	0	0
Kottorp_2013_BJOccThe	RMT	A	0	1	0	0
Kowalski_2012_QoLR	RMT	A	1	0	0	0
Krageloh_2013_QoLR	RMT	A	0	2	0	1
Krpata_2012_JACSur	RMT	A	5	0	0	0
KrumlindeSundholm_2003_SJOT	RMT	A	0	5	0	0
KrumlindeSundholm_2012_DMCN	RMT	A	0	5	0	0
Kucukdeveci_2013_DisReh	RMT	A	1	3	0	0
Kuo_2015_IJSE	RMT	A	1	0	0	0
Kurtais_2011_BMCMusDis	RMT	A	1	4	0	0
Kurtais_2013_JMusPai	RMT	A	1	4	0	0
Kutlay_2011_CliReh_A	RMT	A	0	17	1	0
Kutlay_2011_RheInt_B	RMT	A	0	1	1	0
Kyriakides_2014_SESImp	RMT	A	0	2	0	0
Lai_2014_JPaiSyMan	IRT	A	23	0	0	0
Lajeunesse_2002_PRSBBS	IRT	A	6	0	0	0
Lamb_2014_JSEduTec	RMT	A	1	0	0	0
LambertMC_2013_CYCarFor	RMT	A	0	1	0	0
LambertMC_2015_IMHJ	RMT	A	1	0	0	0
LambertRG_2015_ECRQ	RMT	A	3	1	0	0
Lange_2002_JAlzDis_A	MTT	A	2	3	0	1
Lange_2004_BJPsycho	RMT	A	1	3	0	0
Lange_2005_DynPsy	RMT	A	2	1	0	0
Lange_2015_AHSciEdu_A	RMT	A	1	0	0	0
Lange_2015_SexCul_C	RMT	A	0	1	0	0
LaPorta_2011_JRehMed	RMT	A	4	2	0	2
LaPorta_2012_APMR	RMT	A	0	3	1	0
LaPorta_2013_APMR	RMT	A	0	3	1	0
LaPorta_2015_EJPRM	RMT	A	0	4	1	0
Lapp_2011_GesThe	IRT	A	0	1	0	0
Larizza_2011_OptViSci	RMT	A	0	1	0	0
Larson_2005_JCliExpNeu	RMT	A	0	1	0	0
Latham_2015_PLOSONE_B	RMT	A	0	1	0	0
Latimer_2012_PsychiRes	RMT	A	14	4	0	0
Latimer_2013_BMCPsych	RMT	A	3	2	1	0
Latimer_2014_PsychiRes	RMT	A	8	0	0	0
LawtonG_2004_Rheu	RMT	A	1	2	0	0
LeeHS_2011_JRST	RMT	A	0	1	0	0
LeeHS_2014_JRST	RMT	A	0	1	0	0
LeeM_2014_DisHeaJ	RMT	A	0	1	0	0
LeeNP_2005_JAM	RMT	A	1	2	0	1
LeeTW_2013_RNurHea	RMT	A	1	0	0	0
LeeYS_2012_MECD	RMT	A	2	0	0	0
Leong_2013_EduPsy	RMT	A	0	5	0	0
Lequerica_2012_JHTraReh	RMT	A	0	2	0	0
Lerdal_2011_IJNurStu_A	RMT	A	0	2	0	0
Lerdal_2011_QoLR_B	RMT	A	0	2	0	0
Lerdal_2013_PsychiRes_B	RMT	A	0	2	0	0
Leske_2012_IOVS	RMT	A	0	1	0	0
LeungC_2011_IJDHumDev_A	RMT	A	0	2	0	0
LeungCB_2011_AEResJou_A	RMT	A	0	2	1	0
LeungYY_2014_JRheu	RMT	A	3	12	1	0
Liao_2004_PPThe	RMT	A	0	3	0	0
Lick_2011_JAM	RMT	A	0	5	0	0
Lieflander_2015_IJSE	RMT	A	0	1	0	0
LiEY_2014_BDB	RMT	A	0	2	0	0
LiJ_2011_BMCPH	RMT	A	0	7	0	1
Lillo_2012_ALScl	RMT	A	0	1	0	0
LimGS_2011_LanTes	RMT	A	0	2	0	0
Lindner_2014_JRRD	RMT	A	0	1	0	0
LinKC_2012_JRehMed	RMT	A	0	1	0	0
LinYH_2012_RDevDis	RMT	A	0	2	0	0
LiuHHT_2015_SAGEopen	RMT	A	1	1	0	0
LiuOL_2015_IJSE	RMT	A	0	1	0	0
LiuX_2005_JRST_B	RMT	A	0	2	0	0
LoC_2015_HQoLO	RMT	A	4	4	0	0
Long_2011_EduResEva	RMT	A	0	1	0	2
Looney_2003_JAM	RMT	A	0	1	0	1
Looney_2004_JAM	RMT	A	0	3	0	0
Lopes_2014_AddBeh	RMT	A	5	0	1	0
Lopes_2015_ANP	RMT	A	3	0	0	0
Loubser_2015_HSAGes	RMT	A	12	10	0	3
Lovaglio_2012_QoLR	RMT	A	3	0	0	0
Lozano_2015_SJP	RMT	A	2	2	0	0
LundgrenNilsson_2011_JRehMed	RMT	A	0	3	0	2
LundgrenNilsson_2012_BMCPH	RMT	A	3	7	1	0
LundgrenNilsson_2013_HQoLO	RMT	A	10	10	1	0
LundgrenNilsson_2014_ViH	RMT	A	1	4	0	0
Lundstrom_2014_JSCM	RMT	A	0	2	0	0
Lust_2013_CHumBeh	RMT	A	0	2	0	0
LuYM_2013_HQoLO	RMT	A	0	1	0	0
Ma_2014_JMIR	RMT	A	0	1	0	0
Magistrale_2015_MulSclJ	RMT	A	1	0	0	0
Maimon_2012_BJCri	RMT	A	0	1	0	0
Maitra_2015_WorDev	RMT	A	0	1	0	0
Makransky_2014_Assessm_A	RMT	A	1	2	0	0
Makransky_2014_QoLR_B	RMT	A	1	0	0	0
Makransky_2015_JCarAss	RMT	A	2	1	0	0
Malec_2004_APMR	RMT	A	2	0	0	0
Malec_2012_APMR	RMT	A	1	0	0	0
Malinowsky_2011_SJOT	RMT	A	0	2	0	0
Malinowsky_2012_IPsychoger	RMT	A	1	1	0	0
Malinowsky_2013_TecDis	RMT	A	0	1	0	0
Malinowsky_2014_SJOT_B	RMT	A	0	2	0	0
Malinowsky_2015_HKJOT	RMT	A	0	1	0	0
Mallinckrodt_2014_JCouPsy	RMT	A	2	0	0	0
Mallinson_2011_APMR	RMT	A	0	1	0	0
Mallinson_2014_APMR	RMT	A	0	1	0	0
Mannarini_2013_TPM_C	RMT	A	0	2	0	0
Mannarini_2014_PLOSONE_A	RMT	A	0	3	1	0
Marino_2004_APMR	IRT	A	11	0	0	0
Markward_2004_JAM_A	RMT	A	10	2	0	1
MartinM_2004_JCE	IRT	A	1	0	0	0
Maslak_2005_JAM	RMT	A	0	2	0	0
Massof_2001_SurOph_A	RMT	A	0	16	0	0
Massof_2005_APMR_A	RMT	A	1	6	0	0
Massof_2005_APMR_B	RMT	A	4	1	0	0
Matsuda_2015_PT	RMT	A	0	6	0	0
Matthews_2012_JRMatEdu	RMT	A	1	3	0	0
Mavranezouli_2013_MDecMak	RMT	A	0	2	0	0
McAllister_2013_JAM	RMT	A	1	2	0	0
McCarthy_2014_JEmpCou	RMT	A	0	1	0	0
McCreary_2013_NurRes	RMT	A	1	4	0	2
McCutcheon_2002_BJPsycho	RMT	A	2	0	0	0
McDonald_2015_Anthroz	RMT	A	0	1	0	0
McHorney_2002_APMR	IRT	A	8	0	0	0
McWayne_2015_IJSEduPsy	RMT	A	1	2	0	0
Medeiros_2015_Ophtalmo	RMT	A	1	1	0	0
MedinaMirapeix_2014_APMR	RMT	A	2	8	0	0
Mendoza_2014_Appetite	RMT	A	0	2	0	0
Merkies_2015_NeuLet	RMT	A	0	4	0	0
Meroni_2015_JBMR	RMT	A	5	10	0	0
Merrell_2005_JAM	RMT	A	0	7	0	0
MiguelJP_2013_JVocBeh	RMT	A	3	2	0	0
MillerA_2011_DisReh	RMT	A	0	1	0	0
MillerNV_2013_IJMPsyRes	RMT	A	2	2	0	0
Mills_2012_HQoLO	RMT	A	3	9	0	0
Mioshi_2014_ALSFD	RMT	A	0	1	0	0
Mitchell_2012_JINeuSoc	IRT	A	9	0	0	0
Mofreh_2014_IEduStu	RMT	A	0	2	0	0
Mogias_2015_JEnvEdu	RMT	A	0	1	0	0
Mok_2011_ECDCar	RMT	A	1	0	0	0
Mok_2014_APEduRes	RMT	A	0	1	0	0
Mokros_2011_IJLawPsy	IRT	A	10	0	0	0
Mollazadegan_2014_JCRefSur	RMT	A	1	2	0	0
Mollazadegan_2015_ActaOph	RMT	A	0	1	0	0
MolnarBE_2003_ChiMal	RMT	A	0	3	0	0
MolnarG_2013_TSC	RMT	A	1	0	0	0
Morin_2011_Sleep	IRT	A	2	0	0	0
MullerR_2012_RehPsy	RMT	A	0	1	0	1
MurphyS_2014_PhysiCan	RMT	A	0	1	0	0
Murray_2014_JADevDis	IRT	A	14	0	0	0
Mutalib_2015_JEngST	RMT	A	0	1	0	0
Mutz_2013_ResEva	RMT	A	1	0	0	0
Myers_2004_GroDyn	RMT	A	1	0	0	0
Myford_2001_JPEvaEdu	RMT	A	2	7	0	0
Nam_2011_JCarDev	RMT	A	1	0	0	0
Ndosi_2011_BMCMusDis	RMT	A	2	7	0	1
Nehring_2015_IJSE	RMT	A	0	1	0	0
NeumannI_2011_IJSE	RMT	A	0	4	0	0
NeumannI_2015_PJE	RMT	A	0	1	0	0
NeumannK_2013_JRST	RMT	A	2	1	0	0
Ngo_2013_Cornea	RMT	A	4	0	0	1
NgSSN_2012_MEResJou	RMT	A	0	3	0	0
NguyenAM_2014_IOVS	RMT	A	5	0	0	0
Nicolaidou_2011_PDevEdu_A	RMT	A	0	1	0	0
Nicolaidou_2011_SESImp_B	RMT	A	0	3	1	0
Nilsson_2011_SJOT	RMT	A	0	1	0	0
Nishino_2012_MLanJou	RMT	A	0	2	0	0
Nissen_2015_SEduEva	MTT	A	13	0	0	0
Noerholm_2004_QoLR	MTT	A	1	0	0	0
Noltemeyer_2014_AssEffInt	RMT	A	0	13	0	0
Notoh_2013_HKJOT	RMT	A	0	1	0	0
Nott_2012_BJOccThe	RMT	A	0	1	0	0
Nugent_2003_RSWP	IRT	A	9	0	0	0
Nye_2011_JAppPsy	IRT	A	28	0	0	0
Nygard_2014_BJOccThe	RMT	A	1	0	0	0
Nygren_2013_SJOT	RMT	A	0	1	0	0
Ohman_2011_SJOT	RMT	A	0	1	0	0
Okabayashi_2014_JCCGer	RMT	A	0	2	0	0
Olson_2012_IJMedInf	RMT	A	0	8	0	0
ONeill_2005_JNurMea	RMT	A	0	2	0	0
Oon_2011_IJSE	RMT	A	0	4	0	0
Oon_2013_IJSE	RMT	A	0	6	0	0
OrejaRodriguez_2012_JClePro	RMT	A	2	1	1	0
OsmanA_2014_JPerAss	IRT	A	8	0	0	0
Ottonello_2012_MinMed	RMT	A	5	0	0	0
OudeVoshaar_2014_PLOSONE	IRT	A	12	0	0	0
Owings_2013_SAGEopen	IRT	A	2	0	0	0
Ozelie_2012_JSCM	RMT	A	0	1	0	0
PaeEK_2001_AJODO	RMT	A	0	7	0	0
PaeHK_2012_EduResEva_A	RMT	A	1	2	0	0
PaeHK_2012_LAssQua_B	RMT	A	1	2	1	0
PaezK_2014_JHeaCom	RMT	A	1	0	0	0
Pampaka_2012_BEResJ_A	RMT	A	0	1	0	0
Pampaka_2012_BEResJ_B	RMT	A	0	1	0	0
Pampaka_2013_JAM	RMT	A	0	2	1	0
Pampaka_2015_IJEdR	RMT	A	0	1	0	0
Panayides_2012_EJPsy	RMT	A	1	2	0	1
Panayides_2013_EJPsy_C	RMT	A	0	1	0	0
Pantziara_2012_EduStuMat	RMT	A	1	3	0	0
Papageorgiou_2012_LAssQua	RMT	A	0	1	0	0
ParkJJ_2013_AEResJou	RMT	A	1	0	0	0
ParkSY_2011_JPTS	RMT	A	0	2	0	0
Patomella_2004_SJOT	RMT	A	0	6	0	0
Patomella_2011_TecDis	RMT	A	0	3	0	0
Patomella_2015_AJOT	RMT	A	0	6	0	0
Pearton_2014_AOTJ	RMT	A	0	3	0	0
Peeraer_2012_ComEdu	RMT	A	2	0	0	3
Pentecost_2013_JCheEdu	RMT	A	1	0	0	1
Peoples_2013_JAM	RMT	A	4	1	0	0
Peoples_2014_JAM_A	RMT	A	2	2	0	0
Peoples_2014_LER_B	RMT	A	0	7	0	0
Peter_2014_JHeaPsy	RMT	A	7	2	0	1
PhaswanaMafuya_2013_GHA	RMT	A	1	0	0	0
Phillipson_2012_APEduRev	RMT	A	0	2	0	0
Piquero_2001_JCriJus	RMT	A	0	4	1	6
Piquero_2002_SMRes	RMT	A	0	4	2	6
Pishghadam_2011_TIJEPA_B	RMT	A	0	1	0	0
Pitkethly_2012_IJTMan	RMT	A	3	0	0	0
Platz_2013_MusSci	RMT	A	0	1	0	0
PriceCA_2013_JRST	RMT	A	0	2	0	0
PrietoL_2001_JAM	RMT	A	3	1	0	0
PrietoL_2003_ActaPsySca	RMT	A	0	1	0	0
PrietoL_2005_HQoLO	RMT	A	3	0	0	1
Primi_2014_JPsyEdAss	RMT	A	1	0	0	0
Prodinger_2015_ArthCR	RMT	A	30	8	0	0
PusicAL_2013_CPlaSur	RMT	A	1	6	0	0
Putzke_2001_APMR	RMT	A	0	1	0	0
Putzke_2002_APMR_A	RMT	A	0	2	0	0
Putzke_2002_APMR_B	RMT	A	0	3	0	0
Putzke_2002_Pain_C	RMT	A	0	1	0	0
Putzke_2003_JSCM	RMT	A	0	1	0	0
Quail_2011_BMCGer_A	RMT	A	0	2	0	0
Quail_2011_CJAgi_B	RMT	A	0	2	0	0
Quinn_2014_HQoLO	IRT	A	1	0	0	0
Quintao_2013_PsiRefCri	RMT	A	0	0	1	0
Ramakrisnan_2013_JSoftware	RMT	A	0	2	0	0
Raudenbush_2003_SocMet	MTT	A	4	3	0	0
Ready_2013_EduPol	RMT	A	4	3	0	0
Rees_2015_JHeaPsy	RMT	A	0	3	0	0
ReevesTC_2004_HCManRev	RMT	A	5	0	0	0
ReevesTD_2011_IHEdu	RMT	A	0	2	0	0
Rese_2013_CInnMan	RMT	A	0	2	0	0
Revesz_2012_LanLea	RMT	A	0	4	0	0
Riazi_2014_JRehMed	RMT	A	0	1	0	0
Richmond_2015_JAM	RMT	A	0	0	0	1
Riley_2011_JMHPEco	IRT	A	7	0	0	0
RittleJohnson_2011_JEduPsy	RMT	A	0	1	0	0
RittleJohnson_2013_JCogDev	RMT	A	0	1	0	0
Robinson_2011_AEResJou	IRT	A	59	5	0	0
Robnett_2015_JRST	RMT	A	1	1	0	0
Rocha_2012_MDecMak	RMT	A	0	11	0	0
Rojas_2015_HQoLO	RMT	A	1	3	0	0
RojasTejada_2005_SIR	RMT	A	8	1	0	0
Roldan_2012_TIJEPA	RMT	A	0	1	0	0
Romine_2015_IJSE	RMT	A	2	0	0	0
Rose_2014_DiaCliNeu_A	IRT	A	9	0	0	0
Rose_2014_JCE_B	IRT	A	3	0	0	0
Rothenfluh_2012_ESpiJ	RMT	A	0	4	0	0
Royal_2013_JNurMea	RMT	A	0	1	0	0
Royal_2014_AnSciEdu	RMT	A	2	1	0	0
Ruiz_2013_PDTRT	RMT	A	0	2	0	0
Rupp_2005_EduResEva	IRT	A	2	0	0	0
Rush_2003_BioPsy	IRT	A	1	0	0	0
Sabah_2011_JIRSEA	RMT	A	0	1	0	0
Sabah_2013_JBSciEdu	RMT	A	0	3	0	0
Sabariego_2015_PLOSONE_B	RMT	A	11	0	0	0
Sadeh_2012_SPsyQua	RMT	A	0	1	0	0
Saha_2014_JEBCAM	RMT	A	0	2	0	1
Salaffi_2013_CERheu_A	RMT	A	4	0	0	0
Sam_2013_EJPaeNeu	RMT	A	0	1	0	0
SanchezGarcia_2015_PsyAss	RMT	A	5	1	0	0
Santau_2011_SciEdu	RMT	A	8	0	0	0
SantosS_2015_SJP	RMT	A	3	0	0	0
Sarama_2012_JREduEff_B	RMT	A	1	0	0	0
Sargento_2015_SleBre	RMT	A	0	1	1	0
Sauer_2011_Religions	RMT	A	1	4	3	0
Scanlan_2011_LeiStu_B	RMT	A	0	1	0	0
Scanlan_2013_PsychiRes	RMT	A	0	1	0	0
Scanlan_2015_AOTJ_A	RMT	A	0	1	0	0
Scantlebury_2001_JRST	RMT	A	4	0	0	0
Schalet_2014_JAD	IRT	A	26	0	0	0
Schalet_2015_JGIM_A	IRT	A	24	0	0	0
Schalet_2015_JGIM_B	IRT	A	17	0	0	0
Scherman_2011_EduResEva	RMT	A	0	1	0	0
ScholtenI_2002_HigEdu	RMT	A	0	2	0	0
Schroeders_2015_Intelli	IRT	A	2	0	0	0
Schumacker_2004_JAM	RMT	A	0	3	0	0
Schwartz_2012_APMR_A	MTT	A	1	0	0	0
Schwartz_2012_APMR_B	IRT	A	4	1	0	0
Segui_2015_JCE	RMT	A	0	2	0	0
Settanni_2015_FiP	RMT	A	0	1	0	0
Shih_2013_ComEdu_A	RMT	A	0	2	0	0
Shih_2013_ViH_B	RMT	A	0	7	0	0
Shiu_2013_Intelli	MTT	A	1	0	0	0
Shue_2012_LPolSch	RMT	A	1	1	0	0
Sideridis_2013_JLeaDis	RMT	A	2	0	0	0
Sierakowska_2015_QoLR	RMT	A	0	4	0	0
Simone_2011_IJRehRes	RMT	A	3	0	0	0
Simons_2012_AddBeh	RMT	A	0	2	0	0
Sjaastad_2013_IJSE	RMT	A	0	2	0	0
Skalicky_2015_CEO	RMT	A	1	1	0	0
Skibbe_2012_SStuRea	RMT	A	1	4	0	0
Skold_2011_DMCN	RMT	A	0	2	0	0
Slade_2002_JRehMed	RMT	A	1	2	0	0
SmithC_2012_POTPed	RMT	A	0	1	0	0
SmithHJ_2005_AOphth	RMT	A	0	3	0	0
SmithJEV_2001_JAM_B	RMT	A	27	9	0	0
SmithKH_2004_JITPra	RMT	A	0	1	0	0
SmithRM_2004_JAM	RMT	A	11	5	0	0
Sointu_2014_EJPsyEdu	RMT	A	0	1	0	0
Solari_2014_MulSclJ	RMT	A	5	1	0	0
Sondergeld_2014_SciEdu	RMT	A	0	4	1	0
SousaLB_2015_ResAgi	RMT	A	1	1	0	0
Spooren_2013_SpinCord_A	RMT	A	0	7	0	0
Spooren_2013_SpinCord_B	RMT	A	0	3	0	0
Spruiell_2011_JAAPLaw	RMT	A	0	1	0	0
Stark_2001_JAppPsy	IRT	A	4	0	0	0
Stark_2014_MilPsy	IRT	A	1	0	0	0
Stelmack_2004_IOVS_A	RMT	A	0	2	1	0
Stelmack_2004_JRRD_B	RMT	A	0	2	0	0
StevensonCE_2014_FiP	IRT	A	2	0	0	0
Stock_2013_FamMed	RMT	A	1	5	0	0
Straube_2013_TStrReh	RMT	A	0	3	0	0
Strong_2003_DruAlcDep_A	RMT	A	2	2	0	0
Strong_2003_NTRes_B	IRT	A	0	1	0	0
Strong_2004_AddBeh	RMT	A	2	1	0	0
Strong_2005_PID	RMT	A	2	3	0	0
Strout_2014_JNurMea	RMT	A	0	2	0	1
Strout_2015_JHolNur	RMT	A	0	1	0	0
Su_2013_IJRehRes	RMT	A	0	3	0	0
Suhonen_2013_JCliNur	RMT	A	0	1	0	0
Sussman_2013_MECD	RMT	A	0	9	0	0
SwartzCW_2014_JAM	RMT	A	1	2	0	1
Swigris_2014_RespMed	RMT	A	1	0	0	2
Szilagyi_2013_JRMatEdu	RMT	A	0	2	0	0
Taasoobshirazi_2015_IJSE	RMT	A	0	6	0	0
Talib_2012_JSofEng	RMT	A	1	0	0	0
Tanaka_2013_System	RMT	A	0	4	0	0
Tanaka_2015_JATEFL	RMT	A	0	1	0	0
TanCY_2012_AJSPsy	RMT	A	0	3	0	0
Tang_2011_JCE	RMT	A	2	14	0	0
TanJB_2011_SPsyEdu	RMT	A	2	1	0	0
Tarbell_2004_AJOT	RMT	A	0	2	0	0
Tavakol_2014_JNurMea	IRT	A	0	2	0	0
TaylorCS_2012_AMeaEdu	RMT	A	0	1	0	0
TaylorJM_2015_PsyAss	IRT	A	2	0	0	0
TaylorWJ_2012_JCliRhe	RMT	A	0	0	1	0
Teale_2013_APMR	RMT	A	0	9	0	0
Teicher_2015_PLOSONE	RMT	A	2	2	0	1
Tejada_2011_PsyRep	RMT	A	5	2	0	0
Teksoz_2014_EnvEduRes	RMT	A	0	2	0	0
Teman_2013_JAM	RMT	A	0	0	0	1
TenKlooster_2013_HQoLO	MTT	A	2	0	0	0
Tennant_2004_MedCar_A	RMT	A	1	4	4	1
Teresi_2015_PalMed	IRT	A	1	0	0	0
Tesio_2015_JAM	RMT	A	3	0	0	1
Thissen_2011_QoLR	IRT	A	21	0	0	0
Thomas_2015_OTJROPH	RMT	A	0	1	0	0
ThompsonJ_2013_JAM	RMT	A	0	1	0	0
Thurman_2013_AEFLJ	RMT	A	0	3	0	0
Tian_2014_APMR	IRT	A	5	0	0	0
Timler_2014_TLanDis	RMT	A	0	4	0	0
Tormakangas_2011_EduResEva	RMT	A	0	2	0	0
Tractenberg_2013_AHSciEdu	RMT	A	1	0	0	0
TrentHaines_2015_IMHNur	RMT	A	1	1	0	0
Tretter_2013_JSTeaEdu	RMT	A	0	8	0	0
Trippe_2014_MilPsy	IRT	A	2	0	0	0
Trivedi_2004_PsyMed	IRT	A	1	0	0	0
Tshilongamulenzhe_2015_RGCFMI	RMT	A	0	1	0	0
Tulsky_2015_JSCM_A	IRT	A	11	0	0	0
Tulsky_2015_JSCM_B	IRT	A	20	0	0	0
Tulsky_2015_JSCM_C	IRT	A	19	0	0	0
Twiss_2015_QoLR	RMT	A	2	0	0	2
Tyagi_2013_BMCHSRes	RMT	A	0	3	0	0
Tymms_2004_BEResJ	RMT	A	0	1	0	0
Vaingankar_2014_QoLR	RMT	A	1	0	0	0
vanBuuren_2014_SMMR	RMT	A	1	2	0	0
Vandenbroeck_2011_Eye	RMT	A	0	2	0	0
vanderBeek_2013_NmD	RMT	A	4	3	0	0
vandeVijver_2002_Intelli	RMT	A	2	0	0	0
Vellema_2015_FNutBul	MTT	A	0	4	0	0
Velozo_2001_AJPMReh	RMT	A	2	4	0	0
Vilagut_2015_JPsyRes	IRT	A	7	0	0	0
Violani_2003_CliNeu	RMT	A	0	5	0	0
Vitterso_2005_SIR	RMT	A	3	9	0	0
VrachimiSouroulla_2011_EduPsy	RMT	A	1	0	0	0
Wahl_2014_JCE	IRT	A	41	0	0	0
WalkerER_2014_EpiBeh	RMT	A	1	0	0	0
WalkerMJ_2014_EJPsy	RMT	A	0	2	0	0
WalkerTD_2015_HQoLO	RMT	A	0	0	0	1
Walton_2013_HQoLO_A	RMT	A	0	8	0	0
Walton_2013_PT_B	RMT	A	0	22	0	0
Walton_2013_TCJouPai_C	RMT	A	0	25	0	0
WangC_2013_IJEdR	RMT	A	0	1	0	0
WangCC_2015_TSC	RMT	A	0	2	0	0
WangJ_2014_JAM	RMT	A	0	1	0	2
Ward_2014_RDevDis	RMT	A	1	9	0	0
WareJE_2003_QoLR_B	IRT	A	4	0	0	0
WareJE_2005_RehPsy	IRT	A	4	0	0	0
Warwick_2012_TMatApp	RMT	A	0	1	0	0
Waugh_2002_BJEduPsy_A	RMT	A	0	2	0	2
Waugh_2002_JEduAdm_B	RMT	A	0	9	0	0
Waugh_2003_JAM_A	RMT	A	0	2	0	0
Waugh_2003_JAM_B	RMT	A	0	2	0	0
Waugh_2003_SEduEva_C	RMT	A	0	1	0	0
WeberC_2012_JPol	IRT	A	1	0	0	0
Weiland_2012_EduPsy	RMT	A	2	0	0	0
WeiS_2012_JCheEdu	RMT	A	0	4	0	0
WeiS_2014_IJSMatEdu	RMT	A	0	3	0	0
WeiY_2005_Portal	IRT	A	1	0	0	0
Wellman_2004_ChiDev	RMT	A	0	1	0	0
WellsN_2015_MCHJou	RMT	A	1	0	0	0
Wesolowski_2015_MusSci	RMT	A	1	2	0	0
White_2004_APMR	RMT	A	1	1	0	0
Whiteneck_2011_APMR	RMT	A	1	0	0	0
Whiteneck_2012_JSCM	RMT	A	1	1	0	0
Whiteneck_2013_APMR	RMT	A	1	1	0	0
Wilburn_2015_QoLR	RMT	A	0	2	0	1
Wilkerson_2004_PARE	RMT	A	0	2	0	0
Wilkes_2011_AOTJ	RMT	A	0	3	0	0
WilkesGillan_2014_AJOT_A	RMT	A	0	2	0	0
WilkesGillan_2014_AOTJ_B	RMT	A	0	1	0	0
WilliamsB_2012_EHP_A	RMT	A	0	1	0	0
WilsonSR_2012_JACImm	IRT	A	2	0	0	0
Winke_2011_LAssQua	RMT	A	0	1	0	0
Winke_2013_LanTes	RMT	A	2	0	0	0
Winstanley_2013_MelRes	RMT	A	0	1	0	0
Wirtz_2011_PEduCou	RMT	A	8	1	0	0
Wolffsohn_2013_IJOphth	RMT	A	2	2	0	0
WongCK_2013_PT	RMT	A	1	1	0	0
WongHM_2011_CDOEpi	RMT	A	5	0	0	0
WongR_2012_AAJPsy	RMT	A	0	1	0	0
Wooliscroft_2014_JMacromar	RMT	A	0	2	0	0
WrightP_2011_PsyOnc	RMT	A	0	3	0	0
Wustenberg_2012_Intelli	RMT	A	0	1	0	0
YangAS_2013_APManRev_A	RMT	A	0	1	0	0
YangAS_2013_JFSerRes_B	RMT	A	1	1	0	0
YangAS_2015_ISAFM	RMT	A	0	1	0	0
YangSC_2011_JCMAss	RMT	A	0	1	0	1
YanZh_2012_IJCBPL	RMT	A	0	6	0	0
YanZi_2011_MPEES	RMT	A	1	9	0	0
YanZi_2012_PsySpoExe	RMT	A	0	4	0	3
YanZi_2013_EduResEva	RMT	A	3	5	0	0
YanZi_2014_AEPPP_A	RMT	A	0	1	0	0
YanZi_2014_EduResEva_B	RMT	A	0	4	0	0
YanZi_2015_CJEdu_A	RMT	A	0	3	0	0
YanZi_2015_JAM_B	RMT	A	3	4	0	0
YanZi_2015_TTeaEdu_C	RMT	A	3	3	0	0
Yazdani_2015_IJPH	RMT	A	0	0	1	2
Youn_2014_System	RMT	A	0	1	0	0
YoungGS_2011_DevPsy	RMT	A	1	0	0	0
YuL_2004_JAM	RMT	A	0	1	0	0
Zaporozhets_2015_MECD	RMT	A	0	4	0	0
Zebardast_2015_Ophtalmo	RMT	A	3	0	0	0
Zenk_2014_Appetite	RMT	A	0	2	0	0
ZhangD_2015_TRRec	RMT	A	0	5	0	0
Zhong_2015_PLOSONE	MTT	A	1	0	0	0
ZhuW_2001_RQExeSpo	RMT	A	0	1	0	0
ZhuW_2011_MPEES_A	MTT	A	8	0	1	0
ZhuX_2012_MPEES	IRT	A	11	0	0	0
Zill_2013_BMCPH	RMT	A	0	2	0	0
ZuverzaChavarria_2011_RehPsy	RMT	A	0	2	0	0
Aguado_2014_GroDyn	IRT	Mi	5	0	0	0
AllenJ_2013_BMCMRM	IRT	Mi	3	0	0	0
Barofsky_2012_QoLR	IRT	Mi	0	0	1	1
BarrettJJ_2002_JCPMedSet	RMT	Mi	0	3	0	0
Bartlett_2015_PLOSONE	IRT	Mi	7	0	0	0
BartramD_2013_JCCPsy	IRT	Mi	6	0	0	0
Bauer_2012_TCNeuropsy	IRT	Mi	1	0	0	0
Besseris_2015_EJOR	IRT	Mi	1	0	0	0
BevansM_2014_NurOut_B	IRT	Mi	4	0	0	0
Blome_2015_ViH	RMT	Mi	0	3	0	0
Bohnke_2015_SPPE	IRT	Mi	1	0	0	0
Boyce_2014_ImpSci	RMT	Mi	1	0	0	0
Bruder_2011_IJECSEdu	RMT	Mi	1	0	0	0
Cappelleri_2014_SMMR_B	RMT	Mi	4	0	0	0
Carleton_2014_PsyAss	IRT	Mi	3	0	0	0
CarmonaPerera_2013_DruAlcDep	RMT	Mi	0	1	0	0
Chard_2011_JOTSEI	RMT	Mi	0	7	0	0
Chatterji_2015_Lancet	IRT	Mi	3	0	0	0
ChengI_2012_IEEEJSAC	IRT	Mi	11	0	0	0
Cheung_2012_ORM	IRT	Mi	63	0	0	0
ChiuGS_2011_Environm	IRT	Mi	69	0	0	0
Christ_2015_ReaWri	MTT	Mi	1	0	0	0
Chung_2015_QoLR	IRT	Mi	11	0	0	0
Church_2011_JPSocPsy	IRT	Mi	6	0	0	0
Cintas_2011_POTPed	RMT	Mi	0	1	0	0
Commons_2014_BDB_A	RMT	Mi	0	1	0	0
Commons_2015_BDB	RMT	Mi	1	0	0	0
CookJ_2005_SAJP	IRT	Mi	0	1	0	0
DawsonTunik_2003_DevRev_B	RMT	Mi	2	4	0	0
deBoerJ_2014_EduRes	IRT	Mi	35	0	0	0
deOliveira_2013_ESwA	IRT	Mi	30	0	0	0
Desouky_2013_QoLR	IRT	Mi	1	0	0	0
Duncan_2014_JPatSaf	IRT	Mi	2	0	0	0
Ehmke_2005_ZDM	RMT	Mi	4	0	0	0
ElosuaOliden_2013_Psicoth	IRT	Mi	5	0	0	0
ElosuaOliden_2014_Psicoth	IRT	Mi	2	0	0	0
Ercikan_2002_AMeaEdu	IRT	Mi	1	0	0	0
Fekete_2011_AJPMReh	RMT	Mi	1	1	0	0
Fortus_2014_JRST_A	RMT	Mi	0	3	0	0
Franchignoni_2014_JOSPT_A	RMT	Mi	0	1	0	0
Gaotlhobogwe_2011_EResearch	RMT	Mi	0	1	0	0
Gesthuizen_2013_QaQ	IRT	Mi	5	0	0	0
Ghaziani_2013_SJOT	MTT	Mi	0	1	0	0
GibbonsCJ_2014_FiP	MTT	Mi	0	1	0	0
Glanzel_2013_Scientom	RMT	Mi	5	0	0	0
Gobert_2013_JLeaSci	IRT	Mi	17	0	0	0
Goldhaber_2013_EEPolAna	IRT	Mi	2	1	0	0
GomezR_2013_JAttDis	IRT	Mi	12	0	0	0
Grand_2015_AJouSta	IRT	Mi	23	4	0	0
Gross_2015_Epidem_A	IRT	Mi	3	0	0	0
Grossschedl_2013_SEduEva	RMT	Mi	3	0	0	0
Hafidi_2014_IJICTE	IRT	Mi	3	0	0	0
HansonEM_2015_RDevDis	IRT	Mi	17	0	0	0
HansonRK_2013_SexAbuJRT	IRT	Mi	11	0	0	0
Harstad_2015_JADevDis	IRT	Mi	12	0	0	0
Hashizume_2015_NmD	MTT	Mi	0	1	0	0
Hays_2001_AnMed	IRT	Mi	0	2	0	0
Heldsinger_2013_EResearch	IRT	Mi	0	1	0	0
Henning_2015_SAJP	RMT	Mi	1	0	0	1
HillAnE_2012_OTPra	RMT	Mi	1	0	0	0
Hochweber_2014_JEduPsy	RMT	Mi	1	0	0	0
Holly_2015_JACP	IRT	Mi	1	0	0	0
Horan_2015_PsyAss	IRT	Mi	20	0	0	0
HuC_2011_JVocBeh_A	IRT	Mi	14	0	0	0
HuC_2011_TJPsycho_B	IRT	Mi	15	0	0	0
Ivanova_2013_Aphasiol	MTT	Mi	0	1	0	0
JensenMP_2015_Pain	IRT	Mi	2	0	0	0
JohnsonLB_2012_PMaRCNA	MTT	Mi	0	2	0	0
Kenzik_2014_MDecMak	IRT	Mi	1	0	0	0
Kimber_2015_PLOSONE	RMT	Mi	2	0	0	0
KimJiseon_2013_QoLR	IRT	Mi	12	0	0	0
KlineRB_2013_EduResEva	IRT	Mi	25	0	0	0
Koop_2013_JudDecMak	RMT	Mi	12	0	0	0
LambertRG_2014_JPsyEdAss	RMT	Mi	0	1	0	0
Lange_2015_PCTRP_B	RMT	Mi	0	1	0	0
Lawrence_2003_DMHOut	IRT	Mi	1	0	0	0
LinPY_2014_EaPM	RMT	Mi	3	0	0	0
LiuHI_2005_IEEETEdu	IRT	Mi	9	0	0	0
Loubser_2014_HSAGes	RMT	Mi	0	3	0	0
Mahmud_2015_JAMAOph	RMT	Mi	5	0	0	0
Malec_2013_JHTraReh	IRT	Mi	2	2	0	1
Mandrioli_2015_NeuSci	RMT	Mi	0	0	0	1
Matsueda_2014_SMRes	IRT	Mi	8	0	0	0
Moss_2012_JSAlcDru	IRT	Mi	2	0	0	0
Motl_2004_RQExeSpo	IRT	Mi	7	0	0	0
NeumannCS_2012_BSLaw	IRT	Mi	2	0	0	0
Okada_2011_Behavior	IRT	Mi	7	0	0	0
Pardhan_2015_IOVS	IRT	Mi	2	0	0	0
Pattison_2002_SocNet	RMT	Mi	1	0	0	0
Pawlowski_2013_PsyNeu	MTT	Mi	2	0	0	0
Perneger_2013_QoLR	IRT	Mi	1	6	0	0
Pizzimenti_2015_AnSciEdu	RMT	Mi	1	0	0	0
Ploubidis_2011_Demog	IRT	Mi	4	0	0	0
PriceH_2014_EduPol	RMT	Mi	7	0	0	0
Providelo_2011_Transpo	RMT	Mi	0	5	0	0
Rapp_2013_FiNeurol	RMT	Mi	3	0	0	0
Raykov_2004_BehThe	IRT	Mi	4	0	0	0
Sass_2014_SEM	IRT	Mi	23	0	0	0
Schulz_2013_Measur	IRT	Mi	2	0	0	0
Schwartz_2014_JNeuroSci	IRT	Mi	1	0	0	0
Sheehan_2013_EMIP	RMT	Mi	11	0	0	0
Skopp_2012_JCliPsycho	IRT	Mi	15	0	0	0
Smout_2014_JCBehSci	RMT	Mi	0	1	0	0
Tabriz_2011_IJCARSur	IRT	Mi	3	0	0	0
Tesio_2012_IJRehRes	MTT	Mi	0	2	0	0
Tomarken_2005_ARCPsy	IRT	Mi	1	0	0	0
Turner_2002_JEChiPsy	RMT	Mi	4	0	0	0
Vandenberg_2002_ORM	IRT	Mi	48	0	0	0
Vanderbei_2014_SIAMRev	RMT	Mi	4	0	0	0
VanDerEijk_2015_PLOSONE	MTT	Mi	3	6	0	0
VegaFernandez_2015_ArthCR	IRT	Mi	9	0	0	0
VerhagenT_2015_JAInfSys	IRT	Mi	1	0	0	0
Vinik_2014_JPNS	RMT	Mi	1	1	0	0
Weiner_2015_AlzDem	RMT	Mi	8	0	0	0
WilliamsDA_2011_ArthCR	IRT	Mi	4	0	0	0
WongCKH_2013_QoLR	MTT	Mi	9	0	0	0
WrightNA_2015_IJSelAss	IRT	Mi	4	0	0	0
Zargaryan_2014_IJAEngRes	RMT	Mi	1	0	0	0
Zecca_2013_JCCPsy	IRT	Mi	23	0	0	0
ZhangZu_2013_InfSci	IRT	Mi	5	0	0	0
Zhao_2014_Entropy	RMT	Mi	6	0	0	0
ZhuW_2013_RQExeSpo	IRT	Mi	3	0	0	0

## Sheet: References
Article	Type	Reference
Andrich_2002_JAM	Th	Andrich D. Understanding Rasch measurement: Understanding resistance to the data-model relationship in Rasch's paradigm: A reflection for the next generation. Journal of Applied Measurement. 2002;3(3):325-59.
Andrich_2003_SSInf	Th	Andrich D. On the distribution of measurements in units that are not arbitrary. Social Science Information. 2003;42(4):557-89.
Andrich_2004_MedCar	Th	Andrich D. Controversy and the Rasch model: a characteristic of incompatible paradigms? Medical Care. 2004;42(1 Suppl).
BarrettP_2003_JManPsy	Th	Barrett P. Beyond psychometrics Measurement, non-quantitative structure, and applied numerics. Journal of Managerial Psychology. 2003;18(5):421-39.
Borsboom_2004_TaP	Th	Borsboom D, Mellenbergh GJ. Why Psychometrics is Not Pathological: A Comment on Michell. Theory & Psychology. 2004;14(1):105-20.
BriggsDC_2013_JEduMea_B	Th	Briggs DC. Measuring growth with vertical scales. Journal of Educational Measurement. 2013;50(2):204-26.
BriggsDC_2015_Measur_B	Th	Briggs DC, Peck FA. Rejoinder to Commentaries on Using Learning Progressions to Design Vertical Scales. Measurement. 2015;13(3-4):206-18.
BriggsDC_2015_Measur_C	Th	Briggs DC, Peck FA. Using Learning Progressions to Design Vertical Scales that Support Coherent Inferences about Student Growth. Measurement. 2015;13(2):75-99.
Bunderson_2011_JAM	Th	Bunderson CV. Developing a Domain Theory defining and exemplifying a Learning Theory of progressive attainments. Journal of Applied Measurement. 2011;12(1):25-48.
Cantley_2015_TaP	Th	Cantley I. How secure is a Newtonian paradigm for psychological and educational measurement? Theory & Psychology. 2015;25(1):117-38.
Embretson_2004_Measur	Th	Embretson SE. Constructs and Measurement Principles in the Second Century of Ability Testing. Measurement. 2004;2(1):55-60.
FischerKW_2002_MSRCD	Th	Fischer KW, Dawson TL. A new kind of developmental science: Using models to integrate theory and research: Comment. Monographs of the Society for Research in Child Development. 2002;67(1; 268):156-67.
FisherWPJ_2003_TaP_A	Th	Fisher WP. Mathematics, Measurement, Metaphor and Metaphysics I: Implications for Method in Postmodern Science. Theory & Psychology. 2003;13(6):753-90.
FisherWPJ_2003_TaP_B	Th	Fisher WP. Mathematics, Measurement, Metaphor and Metaphysics II: Accounting for Galileo’s ‘Fateful Omission’. Theory & Psychology. 2003;13(6):791-828.
FisherWPJ_2004_HumStu	Th	Fisher Jr WP. Meaning and method in the social sciences. Human Studies. 2004;27(4):429-54.
FisherWPJ_2005_JAM_A	Th	Fisher Jr WP. Daredevil barnstorming to the tipping point: New aspirations for the human sciences. Journal of Applied Measurement. 2005;6(2):173-9.
FisherWPJ_2005_QoLR_B	Th	Fisher WP, Jr. "Are factor analytical techniques used appropriately in the validation of health status questionnaires? A systematic review on the quality of factor analysis of the SF-36": Comment. Quality of Life Research. 2005;14(5):1219-21.
FisherWPJ_2011_IJMRApp_A	Th	Fisher WP, Stenner AJ. Integrating qualitative and quantitative research approaches via the phenomenological method. International Journal of Multiple Research Approaches. 2011;5(1).
FisherWPJ_2011_JAM_B	Th	Fisher Jr WP. Bringing human, social, and natural capital to life: Practical consequences and opportunities. Journal of Applied Measurement. 2011;12(1):49-66.
FisherWPJ_2011_Measur_C	Th	Fisher WP, Jr. Stochastic and historical resonances of the unit in physics and psychometrics. Measurement. 2011;9(1):46-50.
Heene_2011_Measur_A	Th	Heene M. An old problem with a new solution, raising classical questions: A commentary on Humphry. Measurement. 2011;9(1):51-4.
Heene_2013_FiP	Th	Heene M. Additive conjoint measurement and the resistance toward falsifiability in psychology. Frontiers in Psychology. 2013;4:246.
Heiser_2004_Psych	Th	Heiser WJ. Geometric representation of association between categories. Psychometrika. 2004;69(4):513-45.
HernandezOrallo_2014_CogSysRes	Th	Hernández-Orallo J, Dowe DL, Hernández-Lloreda MV. Universal psychometrics: Measuring cognitive abilities in the machine kingdom. Cognitive Systems Research. 2014;27:50-74.
HernandezOrallo_2015_AAMAS	Th	Hernández-Orallo J. On environment difficulty and discriminating power. Autonomous Agents and Multi-Agent Systems. 2015;29(3):402-54.
Hessen_2004_JAM	Th	Hessen DJ. A new class of parametric IRT models for dichotomous item scores. Journal of Applied Measurement. 2004;5(4):385-97.
Humphry_2011_Measur	Th	Humphry SM. The role of the unit in physics and psychometrics. Measurement. 2011;9(1):1-24.
Humphry_2013_TaP	Th	Humphry SM. A middle path between abandoning measurement and measurement theory. Theory & Psychology. 2013;23(6):770-85.
Karabatsos_2001_JAM	Th	Karabatsos G. The Rasch model, additive conjoint measurement, and new models of probabilistic measurement theory. Journal of Applied Measurement. 2001;2(4):389-423.
Krabbe_2013_PLOSONE	Th	Krabbe PFM. A generalized measurement model to quantify health: The multi-attribute preference response model. PLoS ONE. 2013;8(11).
Krause_2013_RGenPsy	Th	Krause MS. The data analytic implications of human psychology's dimensions being ordinally scaled. Review of General Psychology. 2013;17(3):318-25.
Kyngdon_2011_Measur_B	Th	Kyngdon A. Psychological measurement needs units, ratios, and real quantities: A commentary on Humphry. Measurement. 2011;9(1):55-8.
Kyngdon_2013_TaP	Th	Kyngdon A. Descriptive theories of behaviour may allow for the scientific measurement of psychological attributes. Theory & Psychology. 2013;23(2):227-50.
Markus_2012_TaP	Th	Markus KA, Borsboom D. The cat came back: Evaluating arguments against psychological measurement. Theory & Psychology. 2012;22(4):452-66.
MaydeuOlivares_2013_Measur	Th	Maydeu-Olivares A. Why Should We Assess the Goodness-of-Fit of IRT Models? Measurement. 2013;11(3):127-37.
McGrath_2005_JPerAss	Th	McGrath RE. Rethinking psychosocial constructs: Reply to comments by Barrett, Kagan, and Maraun and Peters. Journal of Personality Assessment. 2005;85(2):141-5.
Michell_2002_AJPsycho	Th	Michell J. Stevens's theory of scales of measurement and its place in modern psychology. Australian Journal of Psychology. 2002;54(2):99-104.
Michell_2003_JAM_A	Th	Michell J. Measurement: A Beginner's Guide. Journal of Applied Measurement. 2003;4(4):298-308.
Michell_2004_TaP	Th	Michell J. Item Response Models, Pathological Science and the Shape of Error: Reply to Borsboom and Mellenbergh. Theory & Psychology. 2004;14(1):121-9.
Michell_2012_FiP_A	Th	Michell J. Alfred Binet and the concept of heterogeneous orders. Frontiers in Psychology. 2012;3:261.
Michell_2012_TaP_B	Th	Michell J. “The constantly recurring argument”: Inferring quantity from order. Theory & Psychology. 2012;22(3):255-71.
Michell_2014_TaP	Th	Michell J. The Rasch paradox, conjoint measurement, and psychometrics: Response to Humphry and Sijtsma. Theory & Psychology. 2014;24(1):111-23.
Noventa_2014_Psych_A	Th	Noventa S, Stefanutti L, Vidotto G. An analysis of item response theory and Rasch models based on the most probable distribution method. Psychometrika. 2014;79(3):377-402.
Noventa_2014_SJP_B	Th	Noventa S, Stefanutti L, Vidotto G. A derivation of the polytomous rasch model based on the most probable distribution method. Spanish Journal of Psychology. 2014;17(2).
Penfield_2005_JAM	Th	Penfield RD. Unique properties of Rasch model item information functions. Journal of Applied Measurement. 2005;6(4):355-65.
Rupp_2003_AJERes	Th	Rupp AA, Zumbo BD. Which Model is Best? Robustness Properties to Justify Model Choice Among Unidimensional IRT Models under Item Parameter Drift. Alberta Journal of Educational Research. 2003;49(3):264-76.
ScholtenAZ_2011_Measur	Th	Scholten AZ, Maris G, Borsboom D. The emperor's new measurement model. Measurement. 2011;9(1):32-5.
Sijtsma_2012_TaP	Th	Sijtsma K. Psychological measurement between physics and statistics. Theory & Psychology. 2012;22(6):786-809.
Stenner_2013_FiP	Th	Stenner AJ, Fisher WP, Stone, Burdick. Causal Rasch models. Frontiers in Psychology. 2013;4(AUG).
Stone_2014_JAM	Th	Stone MH, Stenner A. Comparison is key. Journal of Applied Measurement. 2014;15(1):26-39.
Trendler_2013_TaP	Th	Trendler G. Measurement in psychology: A case of ignoramus et ignorabimus? A rejoinder. Theory & Psychology. 2013;23(5):591-615.
Ali_2015_APsyMea	Me	Ali US, van Rijn PW. An Evaluation of Different Statistical Targets for Assembling Parallel Forms in Item Response Theory. Applied Psychological Measurement. 2015;40(3):163-79.
Andrews_2002_CogPsy	Me	Andrews G, Halford GS. A cognitive complexity metric applied to cognitive development. Cognitive Psychology. 2002;45(2):153-219.
Andrich_2012_JEBS	Me	Andrich D, Hagquist C. Real and Artificial Differential Item Functioning. Journal of Educational and Behavioral Statistics. 2012;37(3):387-416.
Arai_2011_Behavior	Me	Arai S, Mayekawa S-i. A comparison of equating methods and linking designs for developing an item pool under item response theory. Behaviormetrika. 2011;38(1):1-16.
Arce_2012_IJT	Me	Arce AJ, Wang Z. Applying Rasch Model and Generalizability Theory to Study Modified-Angoff Cut Scores. International Journal of Testing. 2012;12(1):44-60.
Azevedo_2011_CSDAna	Me	Azevedo CLN, Bolfarine H, Andrade DF. Bayesian inference for a skew-normal IRT model under the centred parameterization. Computational Statistics and Data Analysis. 2011;55(1):353-65.
Baghaei_2011_TPLanStu	Me	Baghaei P. Do C-Tests with different number of gaps measure the same construct? Theory and Practice in Language Studies. 2011;1(6):688-93.
Baldwin_2011_JEduMea	Me	Baldwin P. A Strategy for developing a common metric in item response theory when parameter posterior distributions are known. Journal of Educational Measurement. 2011;48(1):1-11.
Baldwin_2013_BJMSP	Me	Baldwin P. On mean-sigma estimators and bias. British Journal of Mathematical and Statistical Psychology. 2013;66(2):277-89.
Battauz_2015_JStaSof	Me	Battauz M. equateIRT: An R package for IRT test equating. Journal of Statistical Software. 2015;68.
Bechger_2015_Psych	Me	Bechger TM, Maris G. A Statistical Test for Differential Item Pair Functioning. Psychometrika. 2015;80(2):317-40.
Bingenheimer_2005_JFamPsy	Me	Bingenheimer JB, Raudenbush SW, Leventhal T, Brooks-Gunn J. Measurement equivalence and differential item functioning in family psychology. Journal of Family Psychology. 2005;19(3):441-55.
Blais_2011_JAM	Me	Blais JG, Grondin J. The influence of labels associated with anchor points of likert-type response scales in survey questionnaires. Journal of Applied Measurement. 2011;12(4):370-86.
Bohnke_2014_Assessm	Me	Böhnke JR, Lutz W. Using Item and Test Information to Optimize Targeted Assessments of Psychological Distress. Assessment. 2014;21(6):679-93.
Bolt_2002_JEduMea	Me	Bolt DM, Cohen AS, Wollack JA. Item parameter estimation under conditions of test speededness: Application of a mixture Rasch model with ordinal constraints. Journal of Educational Measurement. 2002;39(4):331-48.
Bolt_2014_JEduMea	Me	Bolt DM, Deng S, Lee S. IRT model misspecification and measurement of growth in vertical scaling. Journal of Educational Measurement. 2014;51(2):141-62.
BondTN_2013_REcoSta	Me	Bond TN, Lang K. The evolution of the black-white test score gap in grades K-3: The fragility of results. Review of Economics and Statistics. 2013;95(5):1468-79.
Bramley_2013_RPapEdu	Me	Bramley T, Dhawan V. Problems in estimating composite reliability of 'unitised' assessments. Research Papers in Education. 2013;28(1):43-56.
BriggsDC_2013_JEBS_A	Me	Briggs DC, Domingue B. The Gains From Vertical Scaling. Journal of Educational and Behavioral Statistics. 2013;38(6):551-76.
Brock_2002_APMR	Me	Brock KA, Goldie PA, Greenwood KM. Evaluating the effectiveness of stroke rehabilitation: Choosing a discriminative measure. Archives of Physical Medicine and Rehabilitation. 2002;83(1):92-9.
Burro_2011_QaQ	Me	Burro R, Sartori R, Vidotto G. The method of constant stimuli with three rating categories and the use of Rasch models. Quality and Quantity. 2011;45(1):43-58.
CaoM_2015_ORM	Me	Cao M, Drasgow F, Cho S. Developing Ideal Intermediate Personality Items for the Ideal Point Model. Organizational Research Methods. 2015;18(2):252-75.
Carle_2011_CIRes_A	Me	Carle AC, Blumberg SJ, Moore KA, Mbwana K. Advanced psychometric methods for developing and evaluating cut-point-based indicators. Child Indicators Research. 2011;4(1):101-26.
Carter_2014_JBusPsy	Me	Carter NT, Kotrba LM, Lake CJ. Null Results in Assessing Survey Score Comparability: Illustrating Measurement Invariance Using Item Response Theory. Journal of Business and Psychology. 2014;29(2):205-20.
ChangYW_2015_JEduMea	Me	Chang YW, Huang WK, Tsai RC. DIF Detection Using Multiple-Group Categorical CFA With Minimum Free Baseline Approach. Journal of Educational Measurement. 2015;52(2):181-99.
ChenJH_2014_APsyMea	Me	Chen JH, Chen CT, Shih CL. Improving the Control of Type I Error Rate in Assessing Differential Item Functioning for Hierarchical Generalized Linear Model When Impact Is Presented. Applied Psychological Measurement. 2014;38(1):18-36.
Cheong_2013_AMeaEdu	Me	Cheong YF, Kamata A. Centering, Scale Indeterminacy, and Differential Item Functioning Detection in Hierarchical Generalized Linear and Generalized Linear Mixed Models. Applied Measurement in Education. 2013;26(4):233-52.
ChildsRA_2004_PARE	Me	Childs RA, Elgie S, Gadalla T, Traub R, Jaciw AP. IRT-linked standard errors of weighted composites. Practical Assessment, Research and Evaluation. 2004;9(13).
Choi_2011_JStaSof	Me	Choi SW, Gibbons LE, Crane PK. Iordif: An R package for detecting differential item functioning using iterative Hybrid ordinal logistic regression/item response theory and monte Carlo simulations. Journal of Statistical Software. 2011;39(8):1-30.
ChoSJ_2013_JSComSim	Me	Cho SJ, Cohen AS, Kim SH. Markov chain Monte Carlo estimation of a mixture item response theory model. Journal of Statistical Computation and Simulation. 2013;83(2):278-306.
ChoSJ_2014_SEM	Me	Cho SJ, Cohen AS, Kim SH. A Mixture Group Bifactor Model for Binary Responses. Structural Equation Modeling. 2014;21(3):375-95.
Cipriani_2005_JAM	Me	Cipriani D, Fox C, Khuder S, Boudreau N. Comparing Rasch analyses probability estimates to sensitivity, specificity and likelihood ratios when examining the utility of medical diagnostic tests. Journal of Applied Measurement. 2005;6(2):180-201.
Clark_2012_ORM	Me	Clark PC, LaHuis DM. An examination of power and type i errors for two differential item functioning indices using the graded response model. Organizational Research Methods. 2012;15(2):229-46.
CohenAS_2001_APsyMea_A	Me	Cohen AS, Kane MT, Seock-Ho K. The precision of simulation study results. Applied Psychological Measurement. 2001;25(2):136-45.
Commons_2014_JAM_C	Me	Commons ML, Li EY, Richardson AM, Gane-McCalla R, Barker CD, Tuladhar CT. Does the model of hierarchical complexity produce significant gaps between orders and are the orders equally spaced? Journal of Applied Measurement. 2014;15(4):422-50.
CraigSB_2003_ORM	Me	Craig SB, Kaiser RB. Applying Item Response Theory to Multisource Performance Ratings: What Are the Consequences of Violating the Independent Observations Assumption? Organizational Research Methods. 2003;6(1):44-60.
DeBoeck_2005_PsyRev	Me	De Boeck P, Wilson M, Acton G. A Conceptual and Psychometric Framework for Distinguishing Categories and Dimensions. Psychological Review. 2005;112(1):129-58.
deJong_2012_MarSci	Me	De Jong MG, Lehmann DR, Netzer O. State-dependence effects in surveys. Marketing Science. 2012;31(5):838-54.
DeMars_2004_AMeaEdu_A	Me	De Mars CE. Detection of item parameter drift over multiple test administrations. Applied Measurement in Education. 2004;17(3):265-300.
DeMars_2011_AMeaEdu	Me	De Mars CE. An analytic comparison of effect sizes for differential item functioning. Applied Measurement in Education. 2011;24(3):189-209.
DeMars_2012_APsyMea	Me	De Mars CE, Jurich DP. Software note: Using BILOG for fixed-anchor item calibration. Applied Psychological Measurement. 2012;36(3):232-6.
DeMars_2015_EaPM	Me	DeMars CE, Jurich DP. The Interaction of Ability Differences and Guessing When Modeling Differential Item Functioning With the Rasch Model: Conventional and Tailored Calibration. Educational and Psychological Measurement. 2015;75(4):610-33.
Devine_2015_QoLR	Me	Devine J, Otto C, Rose M, Barthel D, Fischer F, Mülhan H, et al. A new computerized adaptive test advancing the measurement of health-related quality of life (HRQoL) in children: the Kids-CAT. Quality of Life Research. 2015;24(4):871-84.
Dietrich_2012_AICSP	Me	Dietrich CB, Wolfe EW, Vanhoy GM. Cognitive radio testing using psychometric approaches: Applicability and proof of concept study. Analog Integrated Circuits and Signal Processing. 2012;73(2):627-36.
Dijkers_2003_APMR	Me	Dijkers MP. A computer adaptive testing simulation applied to the FIM instrument motor component. Archives of Physical Medicine and Rehabilitation. 2003;84(3 SUPPL. 1):384-93.
Dimitrov_2003_JAM_A	Me	Dimitrov DM. Reliability and True-Score Measures of Binary Items as a Function of Their Rasch Difficulty Parameter. Journal of Applied Measurement. 2003;4(3):222-33.
DiStefano_2011_PsyAss	Me	DiStefano C, Morgan G. Examining Classification Criteria: A Comparison of Three Cut Score Methods. Psychological Assessment. 2011;23(2):354-63.
Domingue_2014_Psych	Me	Domingue B. Evaluating the Equal-Interval Hypothesis with Test Score Scales. Psychometrika. 2014;79(1):1-19.
Dupuis_2015_FiP	Me	Dupuis M, Meier E, Capel R, Gendre F. Measuring individuals' response quality in self-administered psychological tests: An introduction to Gendre's functional method. Frontiers in Psychology. 2015;6(MAY).
DuVernet_2014_ORM	Me	DuVernet AM, Wright NA, Meade AW, Coughlin C, Kantrowitz TM. General Mental Ability as a Source of Differential Functioning in Personality Scales. Organizational Research Methods. 2014;17(3):299-323.
Edelen_2015_QoLR	Me	Edelen MO, Stucky BD, Chandra A. Quantifying ‘problematic’ DIF within an IRT framework: application to a cancer stigma index. Quality of Life Research. 2015;24(1):95-103.
Farrokhi_2011_TPLanStu	Me	Farrokhi F, Esfandiari R. A many-facet Rasch model to detect halo effect in three types of raters. Theory and Practice in Language Studies. 2011;1(11):1531-40.
FoxC_2011_MPEES	Me	Fox C, Zhu W, Park Y, Fisette JL, Graber KC, Dyson B, et al. Related critical psychometric issues and their resolutions during development of PE metrics. Measurement in Physical Education and Exercise Science. 2011;15(2):138-54.
FoxCM_2013_InteracCom	Me	Fox CM, Brockmyer JH. The development of the game engagement questionnaire: A measure of engagement in video game playing: Response to reviews. Interacting with Computers. 2013;25(4):290-3.
Franceschini_2015_QuaEng	Me	Franceschini F, Maisano D. Prioritization of QFD Customer Requirements Based on the Law of Comparative Judgments. Quality Engineering. 2015;27(4):437-49.
GaoF_2005_AMeaEdu	Me	Gao F, Chen L. Bayesian or non-Bayesian: A comparison study of item parameter estimation in the three-parameter logistic model. Applied Measurement in Education. 2005;18(4):351-80.
Garrard_2015_BMCMRM	Me	Garrard L, Price LR, Bott MJ, Gajewski BJ. A novel method for expediting the development of patient-reported outcome measures and an evaluation of its performance via simulation. BMC Medical Research Methodology. 2015;15(1).
Gittler_2011_JEBS	Me	Gittler G, Fischer G. IRT-based measurement of short-term changes of ability, with an application to assessing the "Mozart Effect". Journal of Educational and Behavioral Statistics. 2011;36(1):33-75.
Golia_2011_JASci	Me	Golia S. The impact of questionnaire size on the accuracy of the Rasch measure. Journal of Applied Sciences. 2011;11(4):707-12.
Golia_2015_QaQ_B	Me	Golia S, Simonetto A. Treating ordinal data: a comparison between rating scale and structural equation models. Quality and Quantity. 2015;49(3):903-15.
GonzalezBetanzos_2012_Methodo	Me	González-Betanzos F, Abad FJ. The effects of purification and the evaluation of differential item functioning with the likelihood ratio test. Methodology. 2012;8(4):134-45.
Grand_2014_PTAM	Me	Grand A. Analysing latent constructs via a derived metric paired comparison approach: An application to students' emotions in mathematics. Psychological Test and Assessment Modeling. 2014;56(3):287-303.
Griffin_2005_SEduEva	Me	Griffin P. Developing a measure of wealth for primary student families in a developing country: Comparison of two methods of psychometric calibration. Studies in Educational Evaluation. 2005;31(2-3):192-206.
Grimm_2013_SEM	Me	Grimm KJ, Kuhl AP, Zhang Z. Measurement Models, Estimation, and the Study of Change. Structural Equation Modeling. 2013;20(3):504-17.
Haley_2004_APMR_A	Me	Haley SM, Coster WJ, Andres PL, Kosinski M, Ni P. Score comparability of short forms and computerized adaptive testing: Simulation study with the activity measure for post-acute care. Archives of Physical Medicine and Rehabilitation. 2004;85(4):661-6.
Haley_2005_APMR	Me	Haley SM, Raczek AE, Coster WJ, Dumas HM, Fragala-Pinkham MA. Assessing mobility in children using a computer adaptive testing version of the pediatric evaluation of disability inventory. Archives of Physical Medicine and Rehabilitation. 2005;86(5):932-9.
HansonBA_2002_APsyMea	Me	Hanson BA, Beguin AA. Obtaining a common scale for item response theory item parameters using separate versus concurrent estimation in the common-item equating design. Applied Psychological Measurement. 2002;26(1):3-24.
Hartig_2012_EaPM	Me	Hartig J, Frey A, Nold G, Klieme E. An Application of Explanatory Item Response Modeling for Model-Based Proficiency Scaling. Educational and Psychological Measurement. 2012;72(4):665-86.
Hastedt_2015_PARE	Me	Hastedt D, Desa D. Linking errors between two populations and tests: A case study in international surveys in education. Practical Assessment, Research and Evaluation. 2015;20(14):1-12.
Heene_2011_PTAM_B	Me	Heene M, Draxler C, Ziegler M, Buhner M. Performance of the bootstrap Rasch model test under violations of non-intersecting item response functions. Psychological Test and Assessment Modeling. 2011;53(3):283-94.
HidalgoMontesinos_2002_EaPM	Me	Hidalgo-Montesinos MD, Lopez-Pina JA. Two-stage equating in differential item functioning detection under the graded response model with the Raju area measures and the Lord statistic. Educational and Psychological Measurement. 2002;62(1):32-44.
Huggins_2014_EaPM	Me	Huggins AC. The Effect of Differential Item Functioning in Anchor Items on Population Invariance of Equating. Educational and Psychological Measurement. 2014;74(4):627-58.
Humphry_2012_JAM	Me	Humphry S. Item set discrimination and the unit in the Rasch model. Journal of Applied Measurement. 2012;13(2):165-80.
Huo_2015_Psych	Me	Huo Y, de la Torre J, Mun EY, Kim SY, Ray AE, Jiao Y, et al. A Hierarchical Multi-Unidimensional IRT Approach for Analyzing Sparse, Multi-Group Data for Integrative Data Analysis. Psychometrika. 2015;80(3):834-55.
JansenMGH_2005_Psych	Me	Jansen MGH, Glas CAW. Checking the assumptions of rasch's model for speed tests. Psychometrika. 2005;70(4):671-84.
Jodoin_2003_JExpEdu	Me	Jodoin MG, Keller LA, Swaminathan H. A comparison of linear, fixed common item, and concurrent parameter estimation equating procedures in capturing academic growth. Journal of Experimental Education. 2003;71(3):229-50.
Joreskog_2001_MulBehRes	Me	Jöreskog KG, Moustaki I. Factor analysis of ordinal variables: A comparison of three approaches. Multivariate Behavioral Research. 2001;36(3):347-87.
Jurich_2012_APsyMea	Me	Jurich DP, DeMars CE, Goodman JT. Investigating the Impact of Compromised Anchor Items on IRT Equating Under the Nonequivalent Anchor Test Design. Applied Psychological Measurement. 2012;36(4):291-308.
Kabasakal_2015_ESTP	Me	Kabasakal KA, Kelecioğlu H. Effect of differential item functioning on test equating. Kuram ve Uygulamada Egitim Bilimleri. 2015;15(5):1229-46.
Kang_2012_APERev	Me	Kang T, Petersen NS. Linking item parameters to a base scale. Asia Pacific Education Review. 2012;13(2):311-21.
KangSM_2005_APsyMea	Me	Kang SM, Waller NG. Moderated multiple regression, spurious interaction effects, and IRT. Applied Psychological Measurement. 2005;29(2):87-105.
Karabatsos_2004_APsyMea	Me	Karabatsos G, Sheu CF. Order-Constrained Bayes Inference for Dichotomous Models of Unidimensional Nonparametric IRT. Applied Psychological Measurement. 2004;28(2):110-25.
Kaskowitz_2001_APsyMea	Me	Kaskowitz GS, De Ayala RJ. The effect of error in item parameter estimates on the test response function method of linking. Applied Psychological Measurement. 2001;25(1):39-52.
KellerLA_2011_EaPM	Me	Keller LA, Keller RR. The long-term sustainability of different item response theory scaling methods. Educational and Psychological Measurement. 2011;71(2):362-79.
KellerLA_2015_AMeaEdu	Me	Keller LA, Keller RR. The Effect of Changing Content on IRT Scaling Methods. Applied Measurement in Education. 2015;28(2):99-114.
Kettler_2011_AMeaEdu	Me	Kettler RJ, Rodriguez MC, Bolt DM, Elliott SN, Beddow PA, Kurz A. Modified multiple-choice items for alternate assessments: Reliability, difficulty, and differential boost. Applied Measurement in Education. 2011;24(3):210-34.
Khadka_2012_IOVS	Me	Khadka J, McAlinden C, Gothwal VK, Lamoureux EL, Pesudovs K. The importance of rating scale design in the measurement of patient-reported outcomes using questionnaires or item banks. Investigative Ophthalmology and Visual Science. 2012;53(7):4042-54.
Khalid_2014_Measur	Me	Khalid MN, Glas CAW. A scale purification procedure for evaluation of differential item functioning. Measurement. 2014;50(1):186-97.
Kieftenbeld_2012_APsyMea	Me	Kieftenbeld V, Natesan P. Recovery of Graded Response Model Parameters: A Comparison of Marginal Maximum Likelihood and Markov Chain Monte Carlo Estimation. Applied Psychological Measurement. 2012;36(5):399-419.
KimJS_2002_APsyMea	Me	Kim JS, Hanson BA. Test equating under the multiple-choice model. Applied Psychological Measurement. 2002;26(3):255-70.
KimSH_2002_APsyMea	Me	Kim SH, Cohen AS. A comparison of linking and concurrent calibration under the graded response model. Applied Psychological Measurement. 2002;26(1):25-41.
KingJ_2003_JAM	Me	King JA, Bond TG. Measuring Client Satisfaction with Public Education I: Meeting Competing Demands in Establishing State-wide Benchmarks. Journal of Applied Measurement. 2003;4(2):111-23.
Kirisci_2001_APsyMea	Me	Kirisci L, Hsu TC, Lifa Y. Robustness of item parameter estimation programs to assumptions of unidimensionality and normality. Applied Psychological Measurement. 2001;25(2):146-62.
Kopf_2015_APsyMea_A	Me	Kopf J, Zeileis A, Strobl C. A Framework for Anchor Methods and an Iterative Forward Approach for DIF Detection. Applied Psychological Measurement. 2015;39(2):83-103.
Kopf_2015_EaPM_B	Me	Kopf J, Zeileis A, Strobl C. Anchor Selection Strategies for DIF Analysis: Review, Assessment, and New Approaches. Educational and Psychological Measurement. 2015;75(1):22-56.
Koskey_2013_JAM	Me	Koskey KL, Sondergeld TA, Beltyukova SA, Fox CM. An experimental study using Rasch analysis to compare absolute magnitude estimation and categorical ratings scaling as applied in survey research. Journal of Applied Measurement. 2013;14(3):262-81.
Koskey_2014_JMMetRes	Me	Koskey KLK, Stewart VC. A Concurrent Mixed Methods Approach to Examining the Quantitative and Qualitative Meaningfulness of Absolute Magnitude Estimation Scales in Survey Research. Journal of Mixed Methods Research. 2014;8(2):180-202.
Kristoffersen_2015_SIR	Me	Kristoffersen I. The metrics of subjective wellbeing data: An empirical evaluation of the ordinal and cardinal comparability of life satisfaction scores. Social Indicators Research. 2015(Pagination):No Pagination Specified.
Krueger_2005_JAbnPsy	Me	Krueger RF, Markon KE, Patrick CJ, Iacono WG. Externalizing psychopathology in adulthood: A dimensional-spectrum conceptualization and its implications for DSM-V. Journal of Abnormal Psychology. 2005;114(4):537-50.
Kyngdon_2004_JAM	Me	Kyngdon A. Comparing factor analysis and the Rasch model for ordered response categories: An investigation of the scale of gambling choices. Journal of Applied Measurement. 2004;5(4):398-418.
Kyngdon_2011_BJMSP_A	Me	Kyngdon A. Plausible measurement analogies to some psychometric models of test performance. British Journal of Mathematical and Statistical Psychology. 2011;64(3):478-97.
Lajeunesse_2003_EcoLet	Me	Lajeunesse MJ, Forbes MR. Variable reporting and quantitative reviews: A comparison of three meta-analytical techniques. Ecology Letters. 2003;6(5):448-54.
Landauer_2011_SStuRea	Me	Landauer TK, Kireyev K, Panaccione C. Word maturity: A new metric for word knowledge. Scientific Studies of Reading. 2011;15(1):92-108.
LeeWC_2002_APsyMea	Me	Lee WC, Hanson BA, Brennan RL. Estimating consistency and accuracy indices for multiple classifications. Applied Psychological Measurement. 2002;26(4):412-32.
Levy_2015_JEduMea	Me	Levy R, Xu Y, Yel N, Svetina D. A Standardized Generalized Dimensionality Discrepancy Measure and a Standardized Model-Based Covariance for Dimensionality Assessment for Multidimensional Models. Journal of Educational Measurement. 2015;52(2):144-58.
Liegl_2016_JCE	Me	Liegl G, Wahl I, Berghofer A, Nolte S, Pieh C, Rose M, et al. Using Patient Health Questionnaire-9 item parameters of a common metric resulted in similar depression scores compared to independent item response theory model reestimation. J Clin Epidemiol. 2016;71:25-34.
Linacre_2002_JAM	Me	Linacre JM, Wright BD. Construction of measures from many-facet data. Journal of Applied Measurement. 2002;3(4):486-512.
LiY_2005_APsyMea	Me	Li Y, Bolt DM, Fu J. A test characteristic curve linking method for the testlet model. Applied Psychological Measurement. 2005;29(5):340-56.
LiYH_2004_IJT_A	Me	Li YH, Tam HP, Tompkins LJ. A Comparison of Using the Fixed Common-Precalibrated Parameter Method and the Matched Characteristic Curve Method for Linking Multiple-Test Items. International Journal of Testing. 2004;4(3):267-93.
LiYH_2004_JEduMea_B	Me	Li YH, Lissitz RW. Applications of the analytically derived asymptotic standard errors of item response theory item parameter estimates. Journal of Educational Measurement. 2004;41(2):85-117.
Massof_2005_OphEpi_C	Me	Massof RW. Application of stochastic measurement models to visual function rating scale questionnaires. Ophthalmic Epidemiology. 2005;12(2):103-24.
Massof_2014_SMMR	Me	Massof RW. A general theoretical framework for interpreting patient-reported outcomes estimated from ordinally scaled item responses. Statistical Methods in Medical Research. 2014;23(5):409-29.
Meade_2012_JAppPsy	Me	Meade AW, Wright NA. Solving the measurement invariance anchor item problem in item response theory. Journal of Applied Psychology. 2012;97(5):1016-31.
Meijer_2004_PsyMet	Me	Meijer RR, Baneke JJ. Analyzing Psychopathology Items: A Case for Nonparametric Item Response Theory Modeling. Psychological Methods. 2004;9(3):354-68.
Milanzi_2014_AnAppSta	Me	Milanzi E, Alonso A, Buyck C, Molenberghs G. A permutational-splitting sample procedure to quantify expert opinion on clusters of chemical compounds using high-dimensional data. Annals of Applied Statistics. 2014;8(4):2319-35.
Morse_2012_APsyMea	Me	Morse BJ, Johanson GA, Griffeth RW. Using the Graded Response Model to Control Spurious Interactions in Moderated Multiple Regression. Applied Psychological Measurement. 2012;36(2):122-46.
Moustaki_2003_BJMSP	Me	Moustaki I. A general class of latent variable models for ordinal manifest variables with covariate effects on the manifest and latent variables. British Journal of Mathematical and Statistical Psychology. 2003;56(2):337-57.
Mukherjee_2013_PTAM	Me	Mukherjee S, Gibbons LE, Kristjansson E, Crane PK. Extension of an iterative hybrid ordinal logistic regression/item response theory approach to detect and account for differential item functioning in longitudinal data. Psychological Test and Assessment Modeling. 2013;55(2):127-47.
NavasAra_2002_EJPA	Me	Navas-Ara MJ, Gómez-Benito J. Effects of ability scale purification on the identification of dif. European Journal of Psychological Assessment. 2002;18(1):9-15.
Nurnadiah_2012_AMatSci_A	Me	Nurnadiah Z, Lazim A. A new weight of interval type-2 fuzzy rasch model. Applied Mathematical Sciences. 2012;6(73-76):3705-22.
Nurnadiah_2012_IJSofCom_B	Me	Nurnadiah Z, Lazim A. Weight of interval type-2 Fuzzy Rasch Model in decision making approach: Ranking causes lead of road accident occurrence. International Journal of Soft Computing. 2012;7(1):1-11.
Odegaard_2014_POpeMan	Me	Ødegaard F, Roos P. Measuring the contribution of workers' health and psychosocial work-environment on production efficiency. Production and Operations Management. 2014;23(12):2191-208.
Ogasawara_2001_APsyMea_B	Me	Ogasawara H. Standard errors of item response theory equating/linking by response function methods. Applied Psychological Measurement. 2001;25(1):53-67.
Ogasawara_2003_Psych	Me	Ogasawara H. Asymptotic standard errors of IRT observed-score equating methods. Psychometrika. 2003;68(2):193-211.
Ong_2013_IJRME	Me	Ong YM, Williams J, Lamprianou I. Exploring differential bundle functioning in mathematics by gender: the effect of hierarchical modelling. International Journal of Research and Method in Education. 2013;36(1):82-100.
Paek_2014_EaPM	Me	Paek I, Park HJ, Cai L, Chi E. A Comparison of Three IRT Approaches to Examinee Ability Change Modeling in a Single-Group Anchor Test Design. Educational and Psychological Measurement. 2014;74(4):659-76.
Pelton_2003_JAM	Me	Pelton TW, Bunderson CV. The Recovery of the Density Scale using a Stochastic Quasi-Realization of Additive Conjoint Measurement. Journal of Applied Measurement. 2003;4(3):269-81.
Pendrill_2015_Measur	Me	Pendrill LR, Fisher WP. Counting and quantification: Comparing psychometric and metrological perspectives on visual perceptions of number. Measurement. 2015;71:46-55.
Penfield_2004_JAM	Me	Penfield RD. The Impact of Model Misfit on Partial Credit Model Parameter Estimates. Journal of Applied Measurement. 2004;5(2):115-28.
Perdices_2015_BraImp	Me	Perdices M. Some thoughts about the suitability of the reliable change index (RCI) for analysis of ordinal scale data. Brain Impairment. 2015;15(3):223-32.
Perret_2011_CogDev	Me	Perret P, Bailleux C, Dauvier B. The influence of relational complexity and strategy selection on children's reasoning in the Latin Square Task. Cognitive Development. 2011;26(2):127-41.
RajuNS_2002_JAppPsy	Me	Raju NS, Laffitte LJ, Byrne BM. Measurement equivalence: A comparison of methods based on confirmatory factor analysis and item response theory. Journal of Applied Psychology. 2002;87(3):517-29.
Reise_2003_PsyMet_B	Me	Reise SP, Waller NG. How Many IRT Parameters Does It Take to Model Psychopathology Items? Psychological Methods. 2003;8(2):164-84.
Reise_2005_JPerAss_B	Me	Reise SP, Haviland MG. Item response theory and the measurement of clinical change. Journal of Personality Assessment. 2005;84(3):228-38.
Roberts_2001_APsyMea	Me	Roberts JS, Lin Y, Laughlin JE. Computerized adaptive testing with the generalized graded unfolding model. Applied Psychological Measurement. 2001;25(2):177-96.
Robie_2001_HumPer	Me	Robie C, Zickar MJ, Schmit MJ. Measurement Equivalence between Applicant and Incumbent Groups: An IRT Analysis of Personality Scales. Human Performance. 2001;14(2):187-207.
Rose_2012_PsychoMed	Me	Rose M, Bjorner JB, Fischer F, Anatchkova M, Gandek B, Klapp BF, et al. Computerized adaptive testing-ready for ambulatory monitoring? Psychosomatic Medicine. 2012;74(4):338-48.
Rouquette_2014_JCE	Me	Rouquette A, Blanchin M, Sébille V, Guillemin F, Côté SM, Falissard B, et al. The minimal clinically important difference determined using item response theory models: An attempt to solve the issue of the association with baseline score. Journal of Clinical Epidemiology. 2014;67(4):433-40.
Sabariego_2015_IJERPH_A	Me	Sabariego C, Oberhauser C, Posarac A, Bickenbach J, Kostanjsek N, Chatterji S, et al. Measuring disability: Comparing the impact of two data collection approaches on disability rates. International Journal of Environmental Research and Public Health. 2015;12(9):10329-51.
SantosJRS_2013_JAppSta	Me	Santos JRS, Azevedo CLN, Bolfarine H. A multiple group item response theory model with centered skew-normal latent trait distributions under a Bayesian framework. Journal of Applied Statistics. 2013;40(10):2129-49.
Seo_2013_JAM	Me	Seo D, Taherbhai H, Paek I. A multidimensional diagnostic perspective on academic achievement goal orientation structure, using the Rasch measurement models. Journal of Applied Measurement. 2013;14(2):129-48.
Seybert_2012_APsyMea	Me	Seybert J, Stark S. Iterative Linking With the Differential Functioning of Items and Tests (DFIT) Method: Comparison of Testwide and Item Parameter Replication (IPR) Critical Values. Applied Psychological Measurement. 2012;36(6):494-515.
Seybert_2014_APsyMea	Me	Seybert J, Stark S, Chernyshenko OS. Detecting DIF With Ideal Point Models: A Comparison of Area and Parameter Difference Methods. Applied Psychological Measurement. 2014;38(2):151-65.
Sheng_2002_StaMed	Me	Sheng X, Carrière KC. An improved CML estimation procedure for the Rasch model with item response data. Statistics in Medicine. 2002;21(3):407-16.
Shih_2014_EaPM	Me	Shih CL, Liu TH, Wang WC. Controlling Type I Error Rates in Assessing DIF for Logistic Regression Method Combined With SIBTEST Regression Correction Procedure and DIF-Free-Then-DIF Strategy. Educational and Psychological Measurement. 2014;74(6):1018-48.
Shojima_2003_Behavior	Me	Shojima K. Linking Tests Under the Continuous Response Model. Behaviormetrika. 2003;30(2):155-71.
Sideridis_2015_JPsyEdAss	Me	Sideridis GD, Tsaousis I, Al-harbi KA. Multi-Population Invariance With Dichotomous Measures: Combining Multi-Group and MIMIC Methodologies in Evaluating the General Aptitude Test in the Arabic Language. Journal of Psychoeducational Assessment. 2015;33(6):568-84.
SmithJEV_2004_EaPM	Me	Smith Jr EV, Kulikowich JM. An application of generalizability theory and many-facet Rasch measurement using a complex problem-solving skills assessment. Educational and Psychological Measurement. 2004;64(4):617-39.
Stark_2002_APsyMea	Me	Stark S, Drasgow F. An EM approach to parameter estimation for the Zinnes and Griggs paired comparison IRT model. Applied Psychological Measurement. 2002;26(2):208-27.
Stark_2004_JAppPsy	Me	Stark S, Chernyshenko OS, Drasgow F. Examining the effects of differential item (functioning and differential) test functioning on selection decisions: When are statistically significant effects practically important? Journal of Applied Psychology. 2004;89(3):497-508.
Stark_2005_APsyMea	Me	Stark S, Chernyshenko OS, Drasgow F. An IRT approach to constructing and scoring pairwise preference items involving stimuli on different dimensions: The multi-unidimensional pairwise-preference model. Applied Psychological Measurement. 2005;29(3):184-203.
Sudweeks_2004_AssWri	Me	Sudweeks RR, Reeve S, Bradshaw WS. A comparison of generalizability theory and many-facet Rasch measurement in an analysis of college sophomore writing. Assessing Writing. 2004;9(3):239-61.
Tate_2003_EaPM	Me	Tate RL. Equating for long-term scale maintenance of mixed format tests containing multiple choice and constructed response items. Educational and Psychological Measurement. 2003;63(6):893-914.
Tay_2011_ORM_B	Me	Tay L, Newman DA, Vermunt JK. Using Mixed-Measurement Item Response Theory With Covariates (MM-IRT-C) to Ascertain Observed and Unobserved Measurement Equivalence. Organizational Research Methods. 2011;14(1):147-76.
Tutz_2015_Psych	Me	Tutz G, Schauberger G. A penalty approach to differential item functioning in Rasch models. Psychometrika. 2015;80(1):21-43.
VerhagenAJ_2013_BJMSP	Me	Verhagen AJ, Fox JP. Bayesian tests of measurement invariance. British Journal of Mathematical and Statistical Psychology. 2013;66(3):383-401.
WangN_2012_IJT	Me	Wang N, Stahl J. Obtaining Content Weights for Test Specifications From Job Analysis Task Surveys: An Application of the Many-Facets Rasch Model. International Journal of Testing. 2012;12(4):299-320.
WangW_2013_APsyMea	Me	Wang W, Tay L, Drasgow F. Detecting Differential Item Functioning of Polytomous Items for an Ideal Point Response Process. Applied Psychological Measurement. 2013;37(4):316-35.
WangWC_2003_APsyMea	Me	Wang WC, Yeh YL. Effects of Anchor Item Methods on Differential Item Functioning Detection with the Likelihood Ratio Test. Applied Psychological Measurement. 2003;27(6):479-98.
WangWC_2004_EaPM_C	Me	Wang WC, Chyi-In W. Gain score in item response theory as an effect size measure. Educational and Psychological Measurement. 2004;64(5):758-80.
WangWC_2004_JExpEdu_D	Me	Wang WC. Effects of anchor item methods on the detection of differential item functioning within the family of Rasch models. Journal of Experimental Education. 2004;72(3):221-61.
WangWC_2012_EaPM	Me	Wang WC, Shih CL, Sun GW. The DIF-Free-Then-DIF Strategy for the Assessment of Differential Item Functioning. Educational and Psychological Measurement. 2012;72(4):687-708.
Waugh_2005_JAM	Me	Waugh RF, Chapman ES. An analysis of dimensionality using factor analysis (true-score theory) and rasch measurement: What is the difference? Which method is better? Journal of Applied Measurement. 2005;6(1):80-99.
WelkenhuysenGybels_2004_QaQ	Me	Welkenhuysen-Gybels J. The performance of some observed and unobserved conditional invariance techniques for the detection of differential item functioning. Quality and Quantity. 2004;38(6):681-702.
WellsCS_2002_APsyMea	Me	Wells CS, Subkoviak MJ, Serlin RC. The effect of item parameter drift on examinee ability estimates. Applied Psychological Measurement. 2002;26(1):77-87.
WellsCS_2014_AMeaEdu	Me	Wells CS, Hambleton RK, Kirkpatrick R, Meng Y. An Examination of Two Procedures for Identifying Consequential Item Parameter Drift. Applied Measurement in Education. 2014;27(3):214-31.
Wiley_2015_PLOSONE	Me	Wiley JA, Martin JL, Herschkorn SJ, Bond J. A new extension of the binomial error model for responses to items of varying difficulty in educational testing and attitude surveys. PLoS ONE. 2015;10(11).
Williamson_2013_EduRes	Me	Williamson GL, Fitzgerald J, Stenner AJ. The Common Core State Standards' Quantitative Text Complexity Trajectory: Figuring Out How Much Complexity Is Enough. Educational Researcher. 2013;42(2):59-69.
Willse_2011_EaPM	Me	Willse JT. Mixture rasch models with joint maximum likelihood estimation. Educational and Psychological Measurement. 2011;71(1):5-19.
Wollack_2002_APsyMea	Me	Wollack JA, Bolt DM, Cohen AS, Lee YS. Recovery of item parameters in the nominal response model: A comparison of marginal maximum likelihood estimation and Markov chain Monte Carlo estimation. Applied Psychological Measurement. 2002;26(3):339-52.
Wollack_2003_JEduMea	Me	Wollack JA, Cohen AS, Wells CS. A Method for Maintaining Scale Stability in the Presence of Test Speededness. Journal of Educational Measurement. 2003;40(4):307-30.
Woods_2013_EaPM	Me	Woods CM, Cai L, Wang M. The Langer-Improved Wald Test for DIF Testing With Multiple Groups: Evaluation and Comparison to Two-Group IRT. Educational and Psychological Measurement. 2013;73(3):532-47.
WrightKD_2015_EaPM	Me	Wright KD, Oshima TC. An Effect Size Measure for Raju’s Differential Functioning for Items and Tests. Educational and Psychological Measurement. 2015;75(2):338-58.
Wyse_2011_APsyMea_A	Me	Wyse AE, Reckase MD. A graphical approach to evaluating equating using test characteristic curves. Applied Psychological Measurement. 2011;35(3):217-34.
Wyse_2011_APsyMea_B	Me	Wyse AE. The potential impact of not being able to create parallel tests on expected classification accuracy. Applied Psychological Measurement. 2011;35(2):110-26.
Wyse_2012_APsyMea	Me	Wyse AE, Hao S. An Evaluation of Item Response Theory Classification Accuracy and Consistency Indices. Applied Psychological Measurement. 2012;36(7):602-24.
XuT_2012_EaPM	Me	Xu T, Stone CA. Using IRT Trait Estimates Versus Summated Scores in Predicting Outcomes. Educational and Psychological Measurement. 2012;72(3):453-68.
Yao_2011_APsyMea	Me	Yao L. Multidimensional linking for domain scores and overall scores for nonequivalent groups. Applied Psychological Measurement. 2011;35(1):48-66.
Ye_2014_EaPM	Me	Ye M, Xin T. Effects of Item Parameter Drift on Vertical Scaling With the Nonequivalent Groups With Anchor Test (NEAT) Design. Educational and Psychological Measurement. 2014;74(2):227-35.
Yildirim_2014_EduSci	Me	Yildirim HH. Findings from an empirical vertical scaling study with BILOG-MG. Egitim ve Bilim. 2014;39(172):65-77.
Yost_2011_JCE	Me	Yost KJ, Eton DT, Garcia SF, Cella D. Minimally important differences were estimated for six Patient-Reported Outcomes Measurement Information System-Cancer scales in advanced-stage cancer patients. Journal of Clinical Epidemiology. 2011;64(5):507-16.
YuCH_2005_PARE	Me	Yu CH, Popp SEO. Test equating by common items and common subjects: Concepts and applications. Practical Assessment, Research and Evaluation. 2005;10(4):1-19.
Yusoff_2014_SAGEopen	Me	Yusoff R, Mohd Janor R. Generation of an interval metric scale to measure attitude. SAGE Open. 2014;4(1).
Zickar_2004_ORM	Me	Zickar MJ, Gibby RE, Robie C. Uncovering Faking Samples in Applicant, Incumbent, and Experimental Data Sets: An Application of Mixed-Model Item Response Theory. Organizational Research Methods. 2004;7(2):168-90.
Alonso_2013_HQoLO	Te	Alonso J, Bartlett SJ, Rose M, Aaronson NK, Chaplin JE, Efficace F, et al. The case for an international patient-reported outcomes measurement information system (PROMIS(R)) initiative. Health Qual Life Outcomes. 2013;11:210. Epub 2013/12/24.
Amtmann_2011_APMR	Te	Amtmann D, Cook KF, Johnson KL, Cella D. The PROMIS initiative: Involvement of rehabilitation stakeholders in development and examples of applications in rehabilitation research. Archives of Physical Medicine and Rehabilitation. 2011;92(10 SUPPL.).
Arons_2013_ERPOR	Te	Arons AMM, Krabbe PFM. Probabilistic choice models in health-state valuation research: Background, theories, assumptions and applications. Expert Review of Pharmacoeconomics and Outcomes Research. 2013;13(1):93-108.
Baylor_2011_AJSLPat	Te	Baylor C, Hula W, Donovan NJ, Doyle PJ, Kendall D, Yorkston K. An introduction to item response theory and rasch models for speech-language pathologists. American Journal of Speech-Language Pathology. 2011;20(3):243-59.
Beck_2001_JNurMea	Te	Beck CT, Gable RK. Item Response Theory in Affective Instrument Development: An Illustration. Journal of Nursing Measurement. 2001;9(1):5-22.
Boone_2011_SciEdu_B	Te	Boone WJ, Townsend JS, Staver J. Using Rasch theory to guide the practice of survey development and survey data analysis in science education and to inform science reform efforts: An exemplar utilizing STEBI self-efficacy data. Science Education. 2011;95(2):258-80.
Cafiero_2014_ANYAS	Te	Cafiero C, Melgar-Quiñonez HR, Ballard TJ, Kepple AW. Validity and reliability of food security measures. Annals of the New York Academy of Sciences2014. p. 230-48.
Cappelleri_2014_CliThe_A	Te	Cappelleri JC, Jason Lundy J, Hays RD. Overview of classical test theory and item response theory for the quantitative assessment of items in developing patient-reported outcomes measures. Clinical Therapeutics. 2014;36(5):648-62.
Carle_2011_ERPOR_B	Te	Carle AC, Cella D, Cai L, Choi SW, Crane PK, Curtis SM, et al. Advancing PROMIS's methodology: Results of the Third Patient-Reported Outcomes Measurement Information System (PROMIS ®) Psychometric Summit. Expert Review of Pharmacoeconomics and Outcomes Research. 2011;11(6):677-84.
Cavanagh_2013_JRTecEdu	Te	Cavanagh RF, Koehler MJ. A turn toward specifying validity criteria in the measurement of Technological Pedagogical Content Knowledge (TPACK). Journal of Research on Technology in Education. 2013;46(2):129-48.
Cella_2015_AmePsy	Te	Cella D, Stone AA. Health-related quality of life measurement in oncology: Advances and opportunities. American Psychologist. 2015;70(2):175-85.
CookKF_2005_HSRes_A	Te	Cook KF, O'Malley KJ, Roddey TS. Dynamic assessment of health outcomes: Time to let the CAT out of the bag? Health Services Research. 2005;40(5 II):1694-711.
Dampier_2014_SAJE	Te	Dampier GA. The need for invariant assessments in South African education. South African Journal of Education. 2014;34(2).
daRocha_2013_JPsyRes	Te	Da Rocha NS, Chachamovich E, de Almeida Fleck MP, Tennant A. An introduction to Rasch analysis for Psychiatric practice and research. Journal of Psychiatric Research. 2013;47(2):141-8.
Doig_2005_MEResJou	Te	Doig B. Developing formal mathematical assessment for 4- to 8-year-olds. Mathematics Education Research Journal. 2005;16(3):100-19.
Ewing_2005_JAdvert	Te	Ewing MT, Salzberger T, Sinkovics RR. An alternate approach to assessing cross-cultural measurement equivalence in advertising research. Journal of Advertising. 2005;34(1):17-36.
Franchignoni_2012_MedFlu_B	Te	Franchignoni F, Giordano A, Marcantonio L, Coccetta CA, Ferriero G. Current issues in psychometric assessment of outcome measures. Medicina Fluminensis. 2012;48(4):463-70.
GibbonsRD_2014_HSORM	Te	Gibbons RD, Perraillon MC, Kim JB. Item response theory approaches to harmonization and research synthesis. Health Services and Outcomes Research Methodology. 2014;14(4):213-31.
Glasgow_2013_AJPreMed	Te	Glasgow RE, Riley WT. Pragmatic measures: What they are and why we need them. American Journal of Preventive Medicine. 2013;45(2):237-43.
Harpe_2015_CPTL	Te	Harpe SE. How to analyze Likert and other rating scale data. Currents in Pharmacy Teaching and Learning. 2015;7(6):836-50.
Harwell_2001_REduRes	Te	Harwell MR, Gatti GG. Rescaling ordinal data to interval data in educational research. Review of Educational Research. 2001;71(1):105-31.
Hobart_2002_CONeu	Te	Hobart J. Measuring disease impact in disabling neurological conditions: Are patients' perspectives and scientific rigor compatible? Current Opinion in Neurology. 2002;15(6):721-4.
Hobart_2003_JNeuNeuPsy	Te	Hobart J. Rating scales for neurologists.Journal of Neurology, Neurosurgery & Psychiatry. 2003;74(4).
Houran_2004_NAJPsy_A	Te	Houran J, Lange R, Rentfrow P, Bruckner KH. Do Online Matchmaking Tests Work? An Assessment of Preliminary Evidence for a Publicized 'Predictive Model of Marital Success'. North American Journal of Psychology. 2004;6(3):507-26.
Kucukdeveci_2011_JRehMed	Te	Küçükdeveci AA, Tennant A, Grimby G, Franchignoni F. Strategies for assessment and outcome measurement in physical and rehabilitation medicine: An educational review. Journal of Rehabilitation Medicine. 2011;43(8):661-72.
Lissitz_2003_PARE	Te	Lissitz RW, Huynh H. Vertical equating for state assessments: Issues and solutions in determination of adequate yearly progress and school accountability. Practical Assessment, Research and Evaluation. 2003;8(10).
Lovelace_2013_CBELSE	Te	Lovelace M, Brickman P. Best practices for measuring students' attitudes toward learning science. CBE Life Sciences Education. 2013;12(4):606-17.
Markon_2013_PsyMet	Te	Markon KE. Information utility: Quantifying the total psychometric information provided by a measure. Psychological Methods. 2013;18(1):15-35.
Markward_2004_JAM_B	Te	Markward NJ. Establishing Mathematical Laws of Genomic Variation. Journal of Applied Measurement. 2004;5(1):1-14.
Masse_2002_AJPreMed	Te	Mâsse LC, Dassa C, Gauvin L, Giles-Corti B, Motl R. Emerging measurement and statistical methods in physical activity research. American Journal of Preventive Medicine. 2002;23(2 SUPPL. 1):44-55.
Massof_2001_VisRes_B	Te	Massof RW, Fletcher DC. Evaluation of the NEI visual functioning questionnaire as an interval measure of visual ability in low vision. Vision Research. 2001;41(3):397-413.
Massof_2002_OptViSci	Te	Massof RW. The measurement of vision disability. Optometry and Vision Science. 2002;79(8):516-52.
Massof_2011_OphEpi	Te	Massof RW. Understanding rasch and item response theory models: Applications to the estimation and validation of interval latent trait measures from responses to rating scale questionnaires. Ophthalmic Epidemiology. 2011;18(1):1-19.
Massof_2013_OptViSci	Te	Massof RW, Stelmack JA. Interpretation of low-vision rehabilitation outcome measures. Optometry and Vision Science. 2013;90(8):788-98.
McGrane_2015_FiP	Te	McGrane JA. Stevens' forgotten crossroads: The divergent measurement traditions in the physical and psychological sciences from the mid-twentieth century. Frontiers in Psychology. 2015;6(MAR).
Mettler_2011_IJHISInf	Te	Mettler T. Transformation of the hospital supply chain: How to measure the maturity of supplier relationship management systems in hospitals? International Journal of Healthcare Information Systems and Informatics. 2011;6(2):1-13.
Michell_2003_SSInf_B	Te	Michell J. Epistemology of measurement: The relevance of its history for quantification in the social sciences. Social Science Information. 2003;42(4):515-34.
Neal_2013_TJEcoEdu	Te	Neal D. The consequences of using one assessment system to pursue two objectives. Journal of Economic Education. 2013;44(4):339-52.
NguyenTH_2014_Patient	Te	Nguyen TH, Han HR, Kim MT, Chan KS. An introduction to item response theory for patient-reported outcome measurement. Patient. 2014;7(1):23-35.
PrietoG_2014_Psicologica	Te	Prieto G, Nieto E. Analysis of rater severity on written expression exam using many faceted rasch measurement. Psicologica. 2014;35(2):385-97.
Reeve_2003_ERPOR	Te	Reeve BB. Item response theory modeling in health outcomes measurement. Expert Review of Pharmacoeconomics and Outcomes Research. 2003;3(2):131-45.
Reise_2003_JPerAss_A	Te	Reise SP, Henson JM. A discussion of modern versus traditional psychometrics as applied to personality assessment scales. Journal of Personality Assessment. 2003;81(2):93-103.
Reise_2005_CDPSci_A	Te	Reise SP, Ainsworth AT, Haviland MG. Item response theory: Fundamentals, applications, and promise in psychological research. Current Directions in Psychological Science. 2005;14(2):95-101.
Roberts_2003_BRMIC	Te	Roberts JS, Huang CW. GGUMLINK: A computer program to link parameter estimates of the generalized graded unfolding model from item response theory. Behavior Research Methods, Instruments, and Computers. 2003;35(4):525-36.
Rupp_2002_IJT	Te	Rupp AA. Feature Selection for Choosing and Assembling Measurement Models: A Building-Block-Based Organization. International Journal of Testing. 2002;2(3-4):311-60.
Salzberger_2013_FiP_A	Te	Salzberger T. Attempting measurement of psychological attributes. Frontiers in Psychology. 2013;4(FEB).
Salzberger_2013_JBusRes_B	Te	Salzberger T, Koller M. Towards a new paradigm of measurement in marketing. Journal of Business Research. 2013;66(9):1307-17.
Seawright_2014_CPolStu	Te	Seawright J, Collier D. Rival Strategies of Validation: Tools for Evaluating Measures of Democracy. Comparative Political Studies. 2014;47(1):111-38.
Seel_2012_APMR	Te	Seel RT, Steyerberg EW, Malec JF, Sherer M, MacCiocchi SN. Developing and evaluating prediction models in rehabilitation populations. Archives of Physical Medicine and Rehabilitation. 2012;93(8 SUPPL.).
Siemons_2014_CERheu	Te	Siemons L, Krishnan E. A short tutorial on item response theory in rheumatology. Clinical and Experimental Rheumatology. 2014;32(4):581-6.
SmithJEV_2001_JAM_A	Te	Smith EV, Jr. Evidence for the reliability of measures and validity of measure interpretation: A Rasch measurement perspective. Journal of Applied Measurement. 2001;2(3):281-311.
Svensson_2001_StaMed	Te	Svensson E. Construction of a single global scale for multi-item assessments of the same variable. Statistics in Medicine. 2001;20(24):3831-46.
Tavakol_2012_MedTea	Te	Tavakol M, Dennick R. Post-examination interpretation of objective test data: Monitoring and improving the quality of high-stakes examinations: AMEE Guide No. 66. Medical Teacher. 2012;34(3).
Tay_2015_ORM	Te	Tay L, Meade AW, Cao M. An Overview and Practical Guide to IRT Measurement Equivalence Analysis. Organizational Research Methods. 2015;18(1):3-46.
Tennant_2004_ViH_B	Te	Tennant A, McKenna SP, Hagell P. Application of Rasch analysis in the development and application of quality of life instruments. Value in Health. 2004;7(SUPPL. 1).
Teo_2011_BJEduTec	Te	Teo T. Towards greater precision in latent construct measurement: What's the Rasch? British Journal of Educational Technology. 2011;42(6).
Tesio_2003_JRehMed	Te	Tesio L. Measuring behaviours and perceptions: Rasch analysis as a tool for rehabilitation research. Journal of Rehabilitation Medicine. 2003;35(3):105-15.
Tesio_2004_JAM	Te	Tesio L. Measurement in clinical vs. biological medicine: The rasch model as a bridge on a widening gap. Journal of Applied Measurement. 2004;5(4):362-6.
ThompsonM_2003_IEduJou	Te	Thompson M. The application of Rasch scaling to wine judging. International Education Journal. 2003;4(3):201-23.
ThompsonNA_2011_PARE	Te	Thompson NA, Weiss DJ. A framework for the development of computerized adaptive tests. Practical Assessment, Research and Evaluation. 2011;16(1):1-9.
Vanhoutte_2015_JPNS	Te	Vanhoutte EK, Hermans MCE, Faber CG, Gorson KC, Merkies ISJ, Thonnard JL. Rasch-ionale for neurologists. Journal of the Peripheral Nervous System. 2015;20(3):260-8.
Velozo_2012_APMR	Te	Velozo CA, Seel RT, Magasi S, Heinemann AW, Romero S. Improving measurement methods in rehabilitation: Core concepts and recommendations for scale development. Archives of Physical Medicine and Rehabilitation. 2012;93(8 SUPPL.).
WareJE_2003_APMR	Te	Ware Jr JE. Conceptualization and measurement of health-related quality of life: Comments on an evolving field. Archives of Physical Medicine and Rehabilitation. 2003;84(4 SUPPL. 2).
Wendt_2011_EduResEva	Te	Wendt H, Bos W, Goy M. On applications of Rasch models in international comparative large-scale assessments: A historical review. Educational Research and Evaluation. 2011;17(6):419-46.
WilsonM_2013_Measur	Te	Wilson M. Using the concept of a measurement system to characterize measurement models used in psychometrics. Measurement. 2013;46(9):3766-74.
ZhuW_2011_MPEES_B	Te	Zhu W, Rink J, Placek JH, Graber KC, Fox C, Fisette JL, et al. PE metrics: Background, testing theory, and methods. Measurement in Physical Education and Exercise Science. 2011;15(2):87-99.
Abad_2004_PID	A	Abad FJ, Colom R, Rebollo I, Escorial S. Sex differential item functioning in the Raven's Advanced Progressive Matrices: Evidence for bias. Personality and Individual Differences. 2004;36(6):1459-70.
AbdElFattah_2014_AJEDP	A	Abd-El-Fattah SM, Al-Sinani Y, El Shourbagi S, Fakhroo HA. Using Rasch analysis to examine the dimensionality structure and differential item functioning of the Arabic version of the perceived Physical Ability Scale for Children. Australian Journal of Educational and Developmental Psychology. 2014;14:29-44.
Abe_2015_AJO	A	Abe RY, Gracitelli CPB, Diniz-Filho A, Zangwill LM, Weinreb RN, Medeiros FA. Frequency doubling technology perimetry and changes in quality of life of glaucoma patients: A longitudinal study. American Journal of Ophthalmology. 2015;160(1):114-22.
AdamsJW_2011_JGPsy	A	Adams JW, Stone M, Vincent RD, Muncer SJ. The role of syllables in anagram solution: A rasch analysis. Journal of General Psychology. 2011;138(2):94-109.
Adanez_2004_JGeoGra	A	Adanez GP, Velasco AD. Training visualization ability by technical drawing. Journal for Geometry and Graphics. 2004;8(1):107-15.
Adler_2011_NJPsy	A	Adler M, Brodin U. An IRT validation of the Affective Self Rating Scale. Nordic Journal of Psychiatry. 2011;65(6):396-402.
AfamasagaFuatai_2014_JMatTEdu	A	Afamasaga-Fuata’i K, Sooaemalelagi L. Student teachers’ mathematics attitudes, authentic investigations and use of metacognitive tools. Journal of Mathematics Teacher Education. 2014;17(4):331-68.
Afrassa_2001_IEduJou	A	Afrassa TM, Keeves JP. Change in differences between the sexes in mathematics achievement at the lower secondary school level in Australia: Over time. International Education Journal. 2001;2(2):96-108.
Ahn_2015_EHP	A	Ahn YH, Yi CH, Ham OK, Kim BJ. Psychometric Properties of the Korean Version of the “Patient Activation Measure 13” (PAM13-K) in Patients With Osteoarthritis. Evaluation and the Health Professions. 2015;38(2):255-64.
Alcala_2004_IBDis	A	Alcalá MJ, Casellas F, Fontanet G, Prieto L, Malagelada JR. Shortened questionnaire on quality of life for inflammatory bowel disease. Inflammatory Bowel Diseases. 2004;10(4):383-91.
Alderman_2012_NeupsyReh	A	Alderman N, Groucott L. Measurement of social climate within neurobehavioural rehabilitation services using the EssenCES. Neuropsychological Rehabilitation. 2012;22(5):768-93.
Aldridge_2012_JSTeaEdu	A	Aldridge JM, Fraser BJ, Bell L, Dorman J. Using a New Learning Environment Questionnaire for Reflection in Teacher Action Research. Journal of Science Teacher Education. 2012;23(3):259-90.
Alguren_2011_TStrReh	A	Algurén B, Bostan C, Christensson L, Fridlund B, Cieza A. A multidisciplinary cross-cultural measurement of functioning after stroke: Rasch analysis of the brief ICF core set for stroke. Topics in Stroke Rehabilitation. 2011;18(1):573-86.
Allison_2011_PID	A	Allison C, Baron-Cohen S, Wheelwright SJ, Stone MH, Muncer SJ. Psychometric analysis of the Empathy Quotient (EQ). Personality and Individual Differences. 2011;51(7):829-35.
Allison_2015_SJP	A	Allison C, Baron-Cohen S, Stone MH, Muncer SJ. Rasch modeling and confirmatory factor analysis of the Systemizing Quotient-Revised (SQ-R) Scale. The Spanish Journal of Psychology. 2015;18.
Alquraan_2011_EBSCMEI	A	Alquraan M, Aljarah AA. Psychometric revision of a Jordanian version of the metamemory in adulthood questionnaire (MIA): Rasch model, confirmatory factor analysis, and classical test theory analyses. Education, Business and Society: Contemporary Middle Eastern Issues. 2011;4(4):292-302.
Alquraan_2014_EBSCMEI	A	Alquraan MF. A cross-cultural study of students’ perceptions of assessment practices in higher education. Education, Business and Society: Contemporary Middle Eastern Issues. 2014;7(4):293-315.
AmreinBeardsley_2012_EAEvaAcc	A	Amrein-Beardsley A, Popp SEO. Peer observations among faculty in a college of education: Investigating the summative and formative uses of the Reformed Teaching Observation Protocol (RTOP). Educational Assessment, Evaluation and Accountability. 2012;24(1):5-24.
Anatchkova_2011_QoLR	A	Anatchkova MD, Ware Jr JE, Bjorner JB. Assessing the factor structure of a role functioning item bank. Quality of Life Research. 2011;20(5):745-58.
AndersonD_2011_EduAss	A	Anderson D, Lai CF, Alonzo J, Tindal G. Examining a grade-level math CBM designed for persistently low-performing students. Educational Assessment. 2011;16(1):15-34.
AndersonD_2015_EMIP	A	Anderson D, Irvin S, Alonzo J, Tindal GA. Gauging Item Alignment Through Online Systems While Controlling for Rater Effects. Educational Measurement: Issues and Practice. 2015;34(1):22-33.
Anselmi_2013_PLOSONE	A	Anselmi P, Vianello M, Voci A, Robusto E. Implicit sexual attitude of heterosexual, gay and bisexual individuals: Disentangling the contribution of specific associations to the overall measure. PLoS ONE. 2013;8(11).
Anselmi_2015_HQoLO	A	Anselmi P, Vidotto G, Bettinardi O, Bertolotti G. Measurement of change in health status with Rasch models. Health and Quality of Life Outcomes. 2015;13(1).
Anshel_2013_PsySpoExe	A	Anshel MH, Kang M, Jubenville C. Sources of acute sport stress scale for sports officials: Rasch calibration. Psychology of Sport and Exercise. 2013;14(3):362-70.
Antonucci_2002_APMR	A	Antonucci G, Aprile T, Paolucci S. Rasch analysis of the Rivermead Mobility Index: A study using mobility measures of first-stroke inpatients. Archives of Physical Medicine and Rehabilitation. 2002;83(10):1442-9.
Apple_2012_JAM	A	Apple MT, Neff P. Using Rasch measurement to validate the Big Five Factor Marker Questionnaire for a Japanese university population. Journal of Applied Measurement. 2012;13(3):276-96.
AriasGonzalez_2015_HQoLO	A	Arias González VB, Crespo Sierra MT, Arias Martínez B, Martínez-Molina A, Ponce FP. An in-depth psychometric analysis of the Connor-Davidson Resilience Scale: Calibration with Rasch-Andrich model. Health and Quality of Life Outcomes. 2015;13(1).
Arnould_2012_BMJOp	A	Arnould C, VanDervelDe L, Batcho CS, Penta M, Thonnard JL. Can manual ability be measured with a generic ABILHAND scale? A cross-sectional study conducted on six diagnostic groups. BMJ Open. 2012;2(6).
Arthurs_2015_JGeoEdu	A	Arthurs L, Hsia JF, Schweinle W. The oceanography concept inventory: A semicustomizable assessment for measuring student understanding of oceanography. Journal of Geoscience Education. 2015;63(4):310-22.
Aryadoust_2011_APJE_A	A	Aryadoust V, Akbarzadeh S, Akbarzedeh S. Psychometric characteristics of the Persian version of the Multidimensional School Anger Inventory-Revised. Asia Pacific Journal of Education. 2011;31(1):51-64.
Aryadoust_2012_IJLis_A	A	Aryadoust V. Differential Item Functioning in While-Listening Performance Tests: The Case of the International English Language Testing System (IELTS) Listening Module. International Journal of Listening. 2012;26(1):40-60.
Aryadoust_2015_PTAM_B	A	Aryadoust V. Application of evolutionary algorithm-based symbolic regression to language assessment: Toward nonlinear modeling. Psychological Test and Assessment Modeling. 2015;57(3):301-37.
Athanasou_2004_AJEDP	A	Athanasou JA, Lamprianou I. Reading in one's ethnic language: A study of Greek-Australian high school students. Australian Journal of Educational and Developmental Psychology. 2004;4:86-96.
Athanasou_2014_AJRC	A	Athanasou JA. An analysis of responses on the earning capacity assessment form-2. Australian Journal of Rehabilitation Counselling. 2014;20(1):15-27.
BabcockParziale_2005_JRRD	A	Babcock-Parziale J, McKnight PE, Head DN. Evaluating psychometric properties of a clinical and a self-report blind rehabilitation outcome measure. Journal of Rehabilitation Research and Development. 2005;42(4):487-97.
Bacon_2005_JManEdu	A	Bacon DR. The effect of group projects on content-related learning. Journal of Management Education. 2005;29(2):248-67.
Baghaei_2014_SAGEopen_B	A	Baghaei P, Cassady J. Validation of the Persian translation of the cognitive test anxiety scale. SAGE Open. 2014;4(4).
Bakhsh_2014_AnSauMed_A	A	Bakhsh H, Franchignoni F, Bravini E, Ferriero G, Giordano A, Foti C. Validation of the Arabic version of the client satisfaction with device module of the "orthotics and prosthetics users" survey. Annals of Saudi Medicine. 2014;34(4):320-7.
Bakhsh_2014_IJRehRes_B	A	Bakhsh H, Franchignoni F, Ferriero G, Giordano A, Demers L. Translation into Arabic of the Quebec User Evaluation of Satisfaction with Assistive Technology 2.0 and validation in orthosis users. International Journal of Rehabilitation Research. 2014;37(4):361-7.
Ballert_2015_APMR	A	Ballert CS, Post MW, Brinkhof MW, Reinhardt JD. Psychometric properties of the Nottwil environmental factors inventory short form. Archives of Physical Medicine and Rehabilitation. 2015;96(2):233-40.
Balsamo_2014_NeupsyDT	A	Balsamo M, Giampaglia G, Saggino A. Building a new Rasch-based self-report inventory of depression. Neuropsychiatric Disease and Treatment. 2014;10:153-65.
Bansilal_2015_SAJS	A	Bansilal S. A Rasch analysis of a Grade 12 test written by mathematics teachers. South African Journal of Science. 2015;111(5-6).
Barbot_2012_TSC	A	Barbot B, Tan M, Randi J, Santa-Donato G, Grigorenko EL. Essential skills for creative writing: Integrating multiple domain-specific perspectives. Thinking Skills and Creativity. 2012;7(3):209-23.
Barghaus_2014_EED	A	Barghaus KM, Fantuzzo JW. Validation of the preschool child observation record: Does it pass the test for use in head start? Early Education and Development. 2014;25(8):1118-41.
Barker_2013_TStrReh	A	Barker S, Horton M, Kent R, Tennant A. Development of a self-report scale of spasticity. Topics in Stroke Rehabilitation. 2013;20(6):485-92.
Barnes_2012_RHigEdu	A	Barnes BJ, Randall J. Doctoral Student Satisfaction: An Examination of Disciplinary, Enrollment, and Institutional Differences. Research in Higher Education. 2012;53(1):47-75.
Barthel_2014_JAffDis	A	Barthel D, Barkmann C, Ehrhardt S, Bindt C. Psychometric properties of the 7-item Generalized Anxiety Disorder scale in antepartum women from Ghana and Côte d'Ivoire. Journal of Affective Disorders. 2014;169:203-11.
Barthel_2015_JAffDis	A	Barthel D, Barkmann C, Ehrhardt S, Schoppen S, Bindt C, Appiah-Poku J, et al. Screening for depression in pregnant women from Côte d'Ivoire and Ghana: Psychometric properties of the Patient Health Questionnaire-9. Journal of Affective Disorders. 2015;187:232-40.
BartramDJ_2013_QoLR	A	Bartram DJ, Sinclair JM, Baldwin DS. Further validation of the Warwick-Edinburgh Mental Well-being Scale (WEMWBS) in the UK veterinary profession: Rasch analysis. Quality of Life Research. 2013;22(2):379-91.
Basra_2015_Dermat	A	Basra MKA, Zammit AM, Kamudoni P, Eghlileb AM, Finlay AY, Salek MS. PFI-14©: A Rasch Analysis Refinement of the Psoriasis Family Index. Dermatology. 2015;231(1):15-23.
Batcho_2012_Stroke	A	Batcho CS, Tennant A, Thonnard JL. ACTIVLIM-stroke: A crosscultural rasch-built scale of activity limitations in patients with stroke. Stroke. 2012;43(3):815-23.
Bates_2013_BMCNeuro	A	Bates D, Burks J, Globe D, Signori M, Hudgens S, Denys P, et al. Development of a short form and scoring algorithm from the validated actionable bladder symptom screening tool. BMC Neurology. 2013;13.
Becker_2012_JEduPsy	A	Becker M, Lüdtke O, Trautwein U, Köller O, Baumert J. The differential effects of school tracking on psychometric intelligence: Do academic-track schools make students smarter? Journal of Educational Psychology. 2012;104(3):682-99.
Beckmann_2015_JSES	A	Beckmann JT, Hung M, Bounsanga J, Wylie JD, Granger EK, Tashjian RZ. Psychometric evaluation of the PROMIS Physical Function Computerized Adaptive Test in comparison to the American Shoulder and Elbow Surgeons score and Simple Shoulder Test in patients with rotator cuff disease. Journal of Shoulder and Elbow Surgery. 2015;24(12):1961-7.
Bedell_2004_NeuroReh	A	Bedell GM. Developing a follow-up survey focused on participation of children and youth with acquired brain injuries after discharge from inpatient rehabilitation. NeuroRehabilitation. 2004;19(3):191-205.
Beggrow_2014_JSEduTec	A	Beggrow EP, Ha M, Nehm RH, Pearl D, Boone WJ. Assessing Scientific Practices Using Machine-Learning Methods: How Closely Do They Match Clinical Interview Performance? Journal of Science Education and Technology. 2014;23(1):160-82.
Behmke_2013_CERP	A	Behmke DA, Atwood CH. Implementation and assessment of Cognitive Load Theory (CLT) based questions in an electronic homework and testing system. Chemistry Education Research and Practice. 2013;14(3):247-56.
Bejerholm_2015_HQoLO	A	Bejerholm U, Lundgren-Nilsson Å. Rasch Analysis of the Profiles of Occupational Engagement in people with Severe mental illness (POES) instrument. Health and Quality of Life Outcomes. 2015;13(1).
Beltyukova_2002_JCStuDev	A	Beltyukova SA, Fox CM. Student satisfaction as a measure of student development: Towards a universal metric. Journal of College Student Development. 2002;43(2):161-72.
Beltyukova_2004_JAM	A	Beltyukova SA, Stone GE, Fox CM. Equating Student Satisfaction Measures. Journal of Applied Measurement. 2004;5(1):62-9.
Benedetti_2014_IJRehRes	A	Benedetti MG, Franchignoni F, Morri M, Franchini N, Natali E, Giordano A. Rasch analysis of the Iowa Level of Assistance Scale in patients with total hip and knee arthroplasty. International Journal of Rehabilitation Research. 2014;37(2):118-24.
Bergersen_2014_IEEETSE	A	Bergersen GR, Sjøberg DIK, Dyba˚ T. Construction and validation of an instrument for measuring programming skill. IEEE Transactions on Software Engineering. 2014;40(12):1163-84.
Beswick_2012_JMatTEdu	A	Beswick K, Callingham R, Watson J. The Nature and Development of Middle School Mathematics Teachers' Knowledge. Journal of Mathematics Teacher Education. 2012;15(2):131-57.
Betemps_2003_JAM	A	Betemps EJ, Smith RM, Baker DG, Rounds-Kugler BA. Measurement Precision of the Clinician Administered PTSD Scale (CAPS): A RASCH Model Analysis. Journal of Applied Measurement. 2003;4(1):59-69.
Betemps_2004_MHSRes	A	Betemps E, Baker DG. Evaluation of the Mississippi PTSD scale - Revised using rasch measurement. Mental Health Services Research. 2004;6(2):117-25.
Bezaiczko_2012_JAM	A	Bezaiczko N, Perkins K. Multi-factor scale consolidation when theory is weak. Journal of Applied Measurement. 2012;13(1):77-96.
Bezruczko_2003_JAM	A	Bezruczko N. Breakthrough Measuring Neighborhoods. Journal of Applied Measurement. 2003;4(2):137-52.
Bezruczko_2011_JAM_A	A	Bezruczko N, Chen SPC, Hill CD, Chesniak JM. Measurement of mothers' confidence to care for children assisted with tracheostomy technology in family homes. Journal of Applied Measurement. 2011;12(4):339-57.
Bezruczko_2011_JPPIDis_B	A	Bezruczko N, Chen S-PC, Gulley S, Maher JM, Lawton CS. Assessment of functional caregiving in homes with a child with an intellectual disability. Journal of Policy and Practice in Intellectual Disabilities. 2011;8(3):207-16.
Bhakta_2005_BMCMedEdu	A	Bhakta B, Tennant A, Horton M, Lawton G, Andrich D. Using item response theory to explore the psychometric properties of extended matching questions examination in undergraduate medical education. BMC Medical Education. 2005;5.
Bianchi_2011_ActaPsy_A	A	Bianchi I, Savardi U, Burro R. Perceptual ratings of opposite spatial properties: Do they lie on the same dimension? Acta Psychologica. 2011;138(3):405-18.
Bjorkdahl_2004_JSCerDis	A	Björkdahl A, Nilsson ÅL, Sunnerhagen KS. The structural properties of the European Brain Injury Questionnaire. Journal of Stroke and Cerebrovascular Diseases. 2004;13(3):122-8.
Bjorner_2003_QoLR_A	A	Bjorner JB, Kosinski M, Ware Jr JE. Calibration of an item pool for assessing the burden of headaches: An application of item response theory to the Headache Impact Test (HIT™). Quality of Life Research. 2003;12(8):913-33.
Bjorner_2003_QoLR_C	A	Bjorner JB, Kosinski M, Ware Jr JE. Using item response theory to calibrate the Headache Impact Test (HIT™) to the metric of traditional headache scales. Quality of Life Research. 2003;12(8):981-1002.
Bjorner_2004_QoLR	A	Bjorner JB, Petersen MA, Groenvold M, Aaronson N, Ahlner-Elmqvist M, Arraras JI, et al. Use of item response theory to develop a shortened version of the EORTC QLQ-C30 emotional functioning scale. Quality of Life Research. 2004;13(10):1683-97.
Bjorner_2014_QoLR	A	Bjorner JB, Rose M, Gandek B, Stone AA, Junghaenel DU, Ware Jr JE. Difference in method of administration did not significantly impact item response: An IRT-based analysis from the Patient-Reported Outcomes Measurement Information System (PROMIS) initiative. Quality of Life Research. 2014;23(1):217-27.
Blackman_2003_IEduJou	A	Blackman I. The perceived complexity of vocational workplace rehabilitation and its implications for supervisor development. International Education Journal. 2003;4(1):1-16.
Blackman_2015_WEBN_B	A	Blackman IR, Giles T. Psychometric Evaluation of a Self-Report Evidence-Based Practice Tool Using Rasch Analysis. Worldviews on Evidence-Based Nursing. 2015;12(5):253-64.
Bode_2002_APMR	A	Bode RK, Heinemann AW. Course of functional improvement after stroke, spinal cord injury, and traumatic brain injury. Archives of Physical Medicine and Rehabilitation. 2002;83(1):100-6.
Bode_2003_APMR_A	A	Bode RK, Lai JS, Cella D, Heinemann AW. Issues in the development of an item bank. Archives of Physical Medicine and Rehabilitation. 2003;84(4 SUPPL. 2).
Bode_2003_ArthCR_B	A	Bode RK, Klein-Gitelman MS, Miller ML, Lechman TS, Pachman LM. Disease activity score for children with juvenile dermatomyositis: Reliability and validity evidence. Arthritis Care and Research. 2003;49(1):7-15.
Bode_2003_JAM_C	A	Bode RK, Cella D, Lai JS, Heinemann AW. Developing an Initial Physical Function Item Bank from Existing Sources. Journal of Applied Measurement. 2003;4(2):124-36.
Boffo_2014_TPM	A	Boffo M, Mannarini S, Pronk T, Wiers RW. Cognitive bias modification of alcohol approach tendencies: A rasch model-based evaluation of a longitudinal study. TPM - Testing, Psychometrics, Methodology in Applied Psychology. 2014;21(4):449-66.
BondTG_2003_JAM_A	A	Bond TG, King JA. Measuring Client Satisfaction with Public Education II: Comparing Schools with State Benchmarks. Journal of Applied Measurement. 2003;4(3):258-68.
Bonsaksen_2013_HQoLO	A	Bonsaksen T, Kottorp A, Gay C, Fagermoen MS, Lerdal A. Rasch analysis of the General Self-Efficacy Scale in a sample of persons with morbid obesity. Health and Quality of Life Outcomes. 2013;11(1).
Boon_2014_NatHaz	A	Boon HJ. Disaster resilience in a flood-impacted rural Australian town. Natural Hazards. 2014;71(1):683-701.
Boon_2015_IJEdR	A	Boon HJ, Lewthwaite B. Development of an instrument to measure a facet of quality teaching: Culturally responsive pedagogy. International Journal of Educational Research. 2015;72:38-58.
Boone_2011_IJSMatEdu_A	A	Boone WJ, Abell SK, Volkmann MJ, Arbaugh F, Lannin JK. Evaluating Selected Perceptions of Science and Mathematics Teachers in an Alternative Certification Program. International Journal of Science and Mathematics Education. 2011;9(3):551-69.
Borsci_2015_IJHCI	A	Borsci S, Federici S, Bacci S, Gnaldi M, Bartolucci F. Assessing User Satisfaction in the Era of User Experience: Comparison of the SUS, UMUX, and UMUX-LITE as a Function of Product Experience. International Journal of Human-Computer Interaction. 2015;31(8):484-95.
Bostan_2014_JRehMed	A	Bostan C, Oberhauser C, Stucki G, Bickenbach J, Cieza A. Which environmental factors are associated with performance when controlling for capacity? Journal of Rehabilitation Medicine. 2014;46(8):806-13.
Bradley_2014_JHapStu	A	Bradley KD, Cunningham JD, Gilman R. Measuring Adolescent Life Satisfaction: A Psychometric Investigation of the Multidimensional Students’ Life Satisfaction Scale (MSLSS). Journal of Happiness Studies. 2014;15(6):1333-45.
Bravini_2014_DisHeaJ	A	Bravini E, Franchignoni F, Ferriero G, Giordano A, Bakhsh H, Sartorio F, et al. Validation of the Italian version of the client satisfaction with device module of the orthotics and prosthetics users' survey. Disability and Health Journal. 2014;7(4):442-7.
Bravini_2015_APMR	A	Bravini E, Franchignoni F, Giordano A, Sartorio F, Ferriero G, Vercelli S, et al. Classical test theory and Rasch analysis validation of the upper limb functional index in subjects with upper limb musculoskeletal disorders. Archives of Physical Medicine and Rehabilitation. 2015;96(1):98-104.
BriggsAL_2005_RSAPha	A	Briggs AL, Jackson TR, Bruce S, Shapiro NL. The development and performance validation of a tool to assess patient anticoagulation knowledge{star, open}. Research in Social and Administrative Pharmacy. 2005;1(1):40-59.
Brinthaupt_2014_Assessm	A	Brinthaupt TM, Kang M. Many-Faceted Rasch Calibration: An Example Using the Self-Talk Scale. Assessment. 2014;21(2):241-9.
Brizuela_2013_RELIEVE	A	Brizuela A, Montero-Rojas E. Prediction of the difficulty level in a standardized reading comprehension test: Contributions from cognitive psychology and psychometrics. RELIEVE - Revista Electronica de Investigacion y Evaluacion Educativa. 2013;19(2):1-21.
Brogardh_2013_PMaR	A	Brogårdh C, Lexell J, Lundgren-Nilsson T. Construct Validity of a New Rating Scale for Self-Reported Impairments in Persons With Late Effects of Polio. PM and R. 2013;5(3):176-81.
BrownNA_2014_FLanAnn	A	Brown NA, Dewey DP, Cox TL. Assessing the validity of can-do statements in retrospective (Then-Now) self-assessment. Foreign Language Annals. 2014;47(2):261-85.
BrownT_2011_BJOccThe_A	A	Brown T. Construct validity of the three motor-reduced subscales of the Developmental Test of Visual Perception - Adolescent and Adult (DTVP-A): A Rasch analysis model evaluation. British Journal of Occupational Therapy. 2011;74(2):66-77.
BrownT_2011_OTJROPH_B	A	Brown T. An examination of the construct validity of the Motor-free Visual Perceptual Test-third edition (MVPT-3) using Rasch analysis with adult participants. OTJR Occupation, Participation and Health. 2011;31(2):73-80.
BudimanMak_2013_JFooAnkR	A	Budiman-Mak E, Conrad KJ, Mazza J, Stuck RM. A review of the foot function index and the foot function index - revised. Journal of Foot and Ankle Research. 2013;6(1).
Burdick_2013_LResIns	A	Burdick H, Swartz CW, Stenner AJ, Fitzgerald J, Burdick D, Hanlon ST. Measuring Students' Writing Ability on a Computer-Analytic Developmental Scale: An Exploratory Validity Study. Literacy Research and Instruction. 2013;52(4):255-80.
Burton_2003_AJHBio	A	Burton C, Stevenson JC, Williams DC, Everson PM, Mahoney ER, Trimble JE. Attention-deficit hyperactivity disorder (AD/HD) and fluctuating asymmetry (FA) in a college sample: An exploratory study. American Journal of Human Biology. 2003;15(5):601-19.
CabreroGarcia_2012_HQoLO	A	Cabrero-García J, Ramos-Pichardo JD, Muñoz-Mendoza CL, Cabañero-Martínez MJ, González-Llopis L, Reig-Ferrer A. Validation of a mobility item bank for older patients in primary care. Health and Quality of Life Outcomes. 2012;10.
Cadime_2014_AnaPsi	A	Cadime I, Ribeiro I, Viana FL, Santos S, Prieto G. Calibration of a reading comprehension test for Portuguese students. Anales de Psicologia. 2014;30(3):1025-34.
Caines_2012_JNegEdu	A	Caines J, Engelhard Jr G. How good is good enough? educational standard setting and its effect on African American test takers. Journal of Negro Education. 2012;81(3):228-40.
Callingham_2004_MEResJou	A	Callingham R, Watson J. A developmental scale of mental computation with part-whole numbers. Mathematics Education Research Journal. 2004;16(2):69-86.
Camargo_2011_JDesRes	A	Camargo FR, Henson B. Measuring affective responses for human-oriented product design using the Rasch model. Journal of Design Research. 2011;9(4):360-75.
Camargo_2015_JED	A	Camargo FR, Henson B. Beyond usability: designing for consumers' product experience using the Rasch model. Journal of Engineering Design. 2015;26(4-6):121-39.
Caracuel_2012_BraInj_A	A	Caracuel A, Verdejo-García A, Fernández-Serrano MJ, Moreno-López L, Santago-Ramajo S, Salinas-Sánchez I, et al. Preliminary validation of the Spanish version of the Frontal Systems Behavior Scale (FrSBe) using Rasch analysis. Brain Injury. 2012;26(6):844-52.
Caracuel_2012_NeuroReh_B	A	Caracuel A, Cuberos-Urbano G, Santiago-Ramajo S, Vilar-Lopez R, Coín-Megias MA, Verdejo-García A, et al. Effectiveness of holistic neuropsychological rehabilitation for Spanish population with acquired brain injury measured using Rasch analysis. NeuroRehabilitation. 2012;30(1):43-53.
Caricati_2013_TPM	A	Caricati L, Mancini T, Sollami A, Guidi C, Prandi C, Bianconcini M, et al. Nurse-physician collaboration scale: A contribution to the italian validation. TPM - Testing, Psychometrics, Methodology in Applied Psychology. 2013;20(3):263-76.
Carlson_2013_JAM	A	Carlson WR. Using the Rasch measurement model to design a report writing assessment instrument. Journal of Applied Measurement. 2013;14(1):10-26.
Caronni_2014_RDevDis	A	Caronni A, Zaina F, Negrini S. Improving the measurement of health-related quality of life in adolescent with idiopathic scoliosis: The SRS-7, a Rasch-developed short form of the SRS-22 questionnaire. Research in Developmental Disabilities. 2014;35(4):784-99.
Carpita_2012_QaQ	A	Carpita M, Golia S. Measuring the quality of work: The case of the Italian social cooperatives. Quality and Quantity. 2012;46(6):1659-85.
Carson_2015_IJSLP	A	Carson K, Boustead T, Gillon G. Content validity to support the use of a computer-based phonological awareness screening and monitoring assessment (Com-PASMA) in the classroom. International Journal of Speech-Language Pathology. 2015;17(5):500-10.
CarvalhoLdF_2012_TPsyPsy	A	Carvalho LF, Primi R, Meyer GJ. Application of the rasch model in measuring personality disorders. Trends in Psychiatry and Psychotherapy. 2012;34(2):101-9.
CarvalhoLdF_2014_APLatam	A	Carvalho LF, Primi R, Stone GE. Psychometric properties of the Inventário dimensional Clínico da Personalidade (IDCP) using the rating scale model. Avances en Psicologia Latinoamericana. 2014;32(3):433-46.
CarvalhoT_2015_JAD	A	Carvalho T, Cunha M, Pinto-Gouveia J, Da Motta C. Development of the Combat Distress Scale of the Combat Experiences Questionnaire (CEQ). Journal of Affective Disorders. 2015;174:602-10.
Cavanagh_2015_LER	A	Cavanagh RF. A unified model of student engagement in classroom learning and classroom learning environment: one measure and one underlying construct. Learning Environments Research. 2015;18(3):349-61.
Cavendish_2013_SPsyEdu	A	Cavendish W. Student perceptions of school efforts to facilitate student involvement, school commitment, self-determination, and high school graduation. Social Psychology of Education. 2013;16(2):257-75.
Cella_2014_QoLR	A	Cella D, Choi S, Garcia S, Cook KF, Rosenbloom S, Lai JS, et al. Setting standards for severity of common symptoms in oncology using the PROMIS item banks and expert judgment. Quality of Life Research. 2014;23(10):2651-61.
ChanDW_2012_IJDDEdu	A	Chan DW, Ho CSH, Chung KKH, Tsang Sm, Lee Sh. The Hong Kong Behaviour Checklist for Primary Students: Developing a brief dyslexia screening measure. International Journal of Disability, Development and Education. 2012;59(2):173-96.
ChangCC_2015_JCE	A	Chang CC, Su JA, Tsai CS, Yen CF, Liu JH, Lin CY. Rasch analysis suggested three unidimensional domains for Affiliate Stigma Scale: Additional psychometric evaluation. Journal of Clinical Epidemiology. 2015;68(6):674-83.
ChangHL_2012_AAnaPre	A	Chang HL, Shih CK. Using a multidimensional Rasch model approach to measure the police's perceived ability to detect, detain and intercept DWI vehicles when conducting sobriety checkpoints. Accident Analysis and Prevention. 2012;48:505-17.
ChangKY_2011_AneAna	A	Chang KY, Tsou MY, Chan KH, Chen HH. Application of the rasch model to develop a simplified version of a multiattribute utility measurement on attitude toward labor epidural analgesia. Anesthesia and Analgesia. 2011;113(6):1444-9.
ChangYC_2013_AJOT	A	Chang YC, Ailey SH, Heller T, De Chen M. Rasch analysis of the mental health recovery measure. American Journal of Occupational Therapy. 2013;67(4):469-77.
ChanRCK_2005_BraInj	A	Chan RCK. How severe should symptoms be before someone is said to be suffering from post-concussion syndrome? An exploratory study with self-reported checklist using Rasch analysis. Brain Injury. 2005;19(13):1117-24.
ChanTL_2015_APMR	A	Chan TL, Perlmutter MS, Andrews M, Sunness JS, Goldstein JE, Massof RW. Equating Visual Function Scales to Facilitate Reporting of Medicare Functional G-Code Severity/Complexity Modifiers for Low-Vision Patients. Archives of Physical Medicine and Rehabilitation. 2015;96(10):1859-65.
ChaoC_2014_IOVS	A	Chao C, Golebiowski B, Cui Y, Stapleton F. Development of a Chinese version of the ocular comfort index. Investigative Ophthalmology and Visual Science. 2014;55(6):3562-71.
ChaoRCL_2013_PsyAss	A	Chao RCL, Green KE. Rasch analysis of the outcome questionnaire with African Americans. Psychological Assessment. 2013;25(2):568-82.
Cheifetz_2014_CuOnc	A	Cheifetz O, Packham TL, Macdermid JC. Rasch analysis of the edmonton symptom assessment system and research implications. Current Oncology. 2014;21(2).
Chemolli_2014_PsyAss	A	Chemolli E, Gagné M. Evidence against the continuum structure underlying motivation measures derived from self-determination theory. Psychological Assessment. 2014;26(2):575-85.
ChenCC_2005_AJPMReh	A	Chen CC, Bode RK, Granger CV, Heinemann AW. Psychometric properties and developmental differences in children's ADL item hierarchy: A study of the WeeFIM® instrument. American Journal of Physical Medicine and Rehabilitation. 2005;84(9):671-9.
ChengHua_2012_TouMan	A	Cheng-Hua Y, Hsin-Li C. Exploring the perceived competence of airport ground staff in dealing with unruly passenger behaviors. Tourism Management. 2012;33(3):611-21.
ChengYH_2011_Ergonom_A	A	Cheng YH, Tsai YC. Railway-controller-perceived competence in incidents and accidents. Ergonomics. 2011;54(12):1130-46.
ChengYH_2011_TRPCET_B	A	Cheng YH. Evaluating web site service quality in public transport: Evidence from Taiwan High Speed Rail. Transportation Research Part C: Emerging Technologies. 2011;19(6):957-74.
ChengYH_2012_TRPAPP	A	Cheng YH, Liu KC. Evaluating bicycle-transit users' perceptions of intermodal inconvenience. Transportation Research Part A: Policy and Practice. 2012;46(10):1690-706.
ChengYH_2014_TranRev	A	Cheng YH, Tsai YC. Train delay and perceived-wait time: passengers' perspective. Transport Reviews. 2014;34(6):710-29.
ChenH_2012_PT	A	Chen H, Wu C, Lin K, Chen CPC, Chen C. Rasch validation of the streamlined wolf motor function test in people with chronic stroke and subacute stroke. Physical Therapy. 2012;92(8):1017-26.
ChenHF_2013_NeureNR	A	Chen HF, Wu CY, Lin KC, Chen CL, Huang PC, Hsieh CJ, et al. Rasch validation of a combined measure of basic and extended daily life functioning after stroke. Neurorehabilitation and Neural Repair. 2013;27(2):125-32.
ChenHF_2014_NeureNR	A	Chen HF, Wu CY, Lin KC, Jang Y, Lin SC, Cheng JW, et al. Measurement properties of streamlined wolf motor function test in patients at Subacute to chronic stages after stroke. Neurorehabilitation and Neural Repair. 2014;28(9):839-46.
ChenLM_2012_EduPsy	A	Chen LM, Liu KS, Cheng YY. Validation of the perceived school bullying severity scale. Educational Psychology. 2012;32(2):169-82.
ChenLM_2015_EduPsy_A	A	Chen LM, Cheng YY, Wang WC, Hsueh CW. The intersection between perceived severity and frequency of being bullied: a Rasch measurement approach. Educational Psychology. 2015;35(4):397-415.
ChenLM_2015_JSH_B	A	Chen LM. Self-Reported Frequency and Perceived Severity of Being Bullied Among Elementary School Students. Journal of School Health. 2015;85(9):587-94.
ChenSK_2013_SIR	A	Chen S-K, Hwang F-M, Lin SS. Satisfaction ratings of QOLPAV: Psychometric properties based on the graded response model. Social Indicators Research. 2013;110(1):367-83.
ChenTA_2015_Appetite	A	Chen TA, O'Connor TM, Hughes SO, Beltran A, Baranowski J, Diep C, et al. Vegetable parenting practices scale. Item response modeling analyses. Appetite. 2015;91:190-9.
ChenYL_2015_JFMA	A	Chen YL, Pan AW, Chung L, Chen TJ. Examining the validity and reliability of the Taita symptom checklist using Rasch analysis. Journal of the Formosan Medical Association. 2015;114(3):221-30.
Chew_2012_AJO	A	Chew M, Chiang PPC, Zheng Y, Lavanya R, Wu R, Saw SM, et al. The impact of cataract, cataract types, and cataract grades on vision-specific functioning using rasch analysis. American Journal of Ophthalmology. 2012;154(1):29-38.
Chiang_PPC_2011_IOVS	A	Chiang PPC, Fenwick E, Marella M, Finger R, Lamoureux E. Validation and reliability of the VF-14 questionnaire in a German population. Investigative Ophthalmology and Visual Science. 2011;52(12):8919-26.
ChienCW_2011_JRehMed_A	A	Chien CW, Brown T, McDonald R. Cross-cultural validity of a naturalistic observational assessment of childrenaposs hand skills: A study using rasch analysis. Journal of Rehabilitation Medicine. 2011;43(7):631-7.
ChienCW_2011_RDevDis_B	A	Chien CW, Brown T, McDonald R. Rasch analysis of the assessment of children's hand skills in children with and without disabilities. Research in Developmental Disabilities. 2011;32(1):253-61.
ChienCW_2012_RDevDis_B	A	Chien CW, Brown T. Construct validity of the Children's Hand-Skills ability Questionnaire (CHSQ) in children with disabilities: A Rasch analysis. Research in Developmental Disabilities. 2012;33(4):1242-53.
ChienTW_2011_BMCPH_A	A	Chien TW, Lai WP, Wang HY, Hsu SY, Castillo RV, Guo HR, et al. Applying the revised Chinese job content questionnaire to assess psychosocial work conditions among Taiwan's hospital workers. BMC Public Health. 2011;11.
ChienTW_2011_PsyOnc_B	A	Chien TW, Wang WC, Chien CC, Hwang WS. Rasch analysis of positive changes following adversity in cancer patients attending community support groups. Psycho-Oncology. 2011;20(1):98-105.
ChienTW_2012_HealthMED	A	Chien TW, Wang WC, Chou MT. Dimension coefficient yielded by Rasch model to measure scale validity: An example using the patient experience diagnostic tool for England hospitals. HealthMED. 2012;6(5):1512-22.
Chiesi_2012_LID_A	A	Chiesi F, Ciancaleoni M, Galli S, Morsanyi K, Primi C. Item Response Theory analysis and Differential Item Functioning across age, gender and country of a short form of the Advanced Progressive Matrices. Learning and Individual Differences. 2012;22(3):390-6.
Chiesi_2012_PsyAss_B	A	Chiesi F, Ciancaleoni M, Galli S, Primi C. Using the advanced progressive matrices (Set I) to assess fluid ability in a short time frame: An item response theory-based analysis. Psychological Assessment. 2012;24(4):892-900.
ChiuEC_2015_PLOSONE_A	A	Chiu EC, Lee SC, Kuo CJ, Lung FW, Hsueh IP, Hsieh CL. Development of a performance-based measure of executive functions in patients with schizophrenia. PLoS ONE. 2015;10(11).
Choi_2014_PsyAss	A	Choi SW, Schalet B, Cook KF, Cella D. Establishing a common metric for depressive symptoms: Linking the BDI-II, CES-D, and PHQ-9 to PROMIS Depression. Psychological Assessment. 2014;26(2):513-27.
ChoSJ_2015_PsyAss	A	Cho SJ, Wilmer J, Herzmann G, McGugin RW, Fiset D, Van Gulick AE, et al. Item response theory analyses of the cambridge face memory test (CFMT). Psychological Assessment. 2015;27(2):552-66.
ChoYH_2015_APJE	A	Cho YH, Chi E. A comparison of attitudes related to global citizenship between Korean- and US-educated Korean university students. Asia Pacific Journal of Education. 2015;35(2):213-25.
Chung_2014_QoLR	A	Chung H, Kim J, Cook KF, Askew RL, Revicki DA, Amtmann D. Testing measurement invariance of the patient-reported outcomes measurement information system pain behaviors score between the US general population sample and a sample of individuals with chronic pain. Quality of Life Research. 2014;23(1):239-44.
Ciesla_2011_SAResTre	A	Ciesla JR, Yao P. Validation of a targeted peer relations scale for adolescents treated for substance use disorder: An application of Rasch modeling. Substance Abuse: Research and Treatment. 2011;5(1):35-44.
Cieza_2015_IJE_A	A	Cieza A, Oberhauser C, Bickenbach J, Jones RN, Üstün TB, Kostanjsek N, et al. The english are healthier than the Americans: Really? International Journal of Epidemiology. 2015;44(1):229-38.
Cieza_2015_PLOSONE_B	A	Cieza A, Sabariego C, Anczewska M, Ballert C, Bickenbach J, Cabello M, et al. PARADISE 24: A measure to assess the impact of brain disorders on people's lives. PLoS ONE. 2015;10(7).
Cinamon_2011_IJGerPsy	A	Cinamon JS, Finch L, Miller S, Higgins J, Mayo N. Preliminary evidence for the development of a stroke specific geriatric depression scale. International Journal of Geriatric Psychiatry. 2011;26(2):188-98.
Classen_2012_AJOT	A	Classen S, Wen PS, Velozo CA, Bédard M, Winter SM, Brumback BA, et al. Rater reliability and rater effects of the Safe Driving Behavior Measure. American Journal of Occupational Therapy. 2012;66(1):69-77.
Classen_2013_AJOT	A	Classen S, Wang Y, Winter SM, Velozo CA, Lanford DN, Bédard M. Concurrent criterion validity of the safe driving behavior measure: A predictor of on-road driving outcomes. American Journal of Occupational Therapy. 2013;67(1):108-16.
Clifford_2013_FLanAnn	A	Clifford R, Cox TL. Empirical validation of reading proficiency guidelines. Foreign Language Annals. 2013;46(1):45-61.
CohenAS_2001_ExcChi_B	A	Cohen AS, Bottge BA, Wells CS. Using item response theory to assess effects of mathematics instruction in special populations. Exceptional Children. 2001;68(1):23-44.
Cole_2012_ZDM	A	Cole Y. Assessing elemental validity: the transfer and use of mathematical knowledge for teaching measures in Ghana. ZDM - International Journal on Mathematics Education. 2012;44(3):415-26.
Colom_2013_Intelli	A	Colom R, Roman FJ, Abad FJ, Shih PC, Privado J, Froufe M, et al. Adaptive n-back training does not improve fluid intelligence at the construct level: Gains on individual tests suggest that training may enhance visuospatial processing. Intelligence. 2013;41(5):712-27.
Comer_2011_Spine	A	Comer CM, Conaghan PG, Tennant A. Internal construct validity of the swiss spinal stenosis questionnaire: Rasch analysis of a disease-specific outcome measure for lumbar spinal stenosis. Spine. 2011;36(23):1969-76.
Commons_2012_IJLawPsy	A	Commons ML, Miller PM, Li EY, Gutheil TG. Forensic experts' perceptions of expert bias. International Journal of Law and Psychiatry. 2012;35(5-6):362-71.
Commons_2014_BDB_B	A	Commons ML, Giri S, Harrigan WJ. The small effects of non-hierarchical complexity variables on performance. Behavioral Development Bulletin. 2014;19(4):31-6.
Connell_2004_JNutri	A	Connell CL, Nord M, Lofton KL, Yadrick K. Food security of older children can be assessed using a standardized survey instrument. Journal of Nutrition. 2004;134(10):2566-72.
ConradKJ_2011_TGeron	A	Conrad KJ, Iris M, Ridings JW, Langley K, Anetzberger GJ. Self-report measure of psychological abuse of older adults. Gerontologist. 2011;51(3):354-66.
ConradKJ_2012_PsyAss	A	Conrad KJ, Conrad KM, Mazza J, Riley BB, Funk R, Stein MA, et al. Dimensionality, hierarchical structure, age generalizability, and criterion validity of the GAIN's Behavioral Complexity Scale. Psychological Assessment. 2012;24(4):913-24.
ConradKM_2015_ERev	A	Conrad KM, Conrad KJ, Passetti LL, Funk RR, Dennis ML. Validation of the Full and Short-Form Self-Help Involvement Scale Against the Rasch Measurement Model. Evaluation Review. 2015;39(4):395-427.
CookKF_2001_SSMed	A	Cook KF, Ashton CM, Byrne MM, Brody B, Geraci J, Giesler RB, et al. A psychometric analysis of the measurement level of the rating scale, time trade-off, and standard gamble. Social Science and Medicine. 2001;53(10):1275-85.
CookKF_2003_MedCar	A	Cook KF, Roddey TS, Gartsman GM, Olson SL. Development and psychometric evaluation of the flexilevel scale of shoulder function. Medical Care. 2003;41(7):823-35.
CookKF_2005_JSES_B	A	Cook KF, Roddey TS, O'Malley KJ, Gartsman GM. Development of a Flexilevel Scale for use with computer-adaptive testing for assessing shoulder function. J Shoulder Elbow Surg. 2005;14(1 Suppl S):90S-4S. Epub 2005/02/24.
CookKF_2012_QoLR	A	Cook KF, Bamer AM, Roddey TS, Kraft GH, Kim J, Amtmann D. A promis fatigue short form for use by individuals who have multiple sclerosis. Quality of Life Research. 2012;21(6):1021-30.
CookKF_2015_QoLR_A	A	Cook KF, Victorson DE, Cella D, Schalet BD, Miller D. Creating meaningful cut-scores for Neuro-QOL measures of fatigue, physical functioning, and sleep disturbance using standard setting with patients and providers. Quality of Life Research. 2015;24(3):575-89.
CookKF_2015_QoLR_B	A	Cook KF, Schalet BD, Kallen MA, Rutsohn JP, Cella D. Establishing a common metric for self-reported pain: linking BPI Pain Interference and SF-36 Bodily Pain Subscale scores to the PROMIS Pain Interference metric. Quality of Life Research. 2015;24(10):2305-18.
Cooper_2015_EduStu	A	Cooper P, Yan Z. Some possible effects of behaviour management training on teacher confidence and competence: evidence from a study of primary school teachers in Hong Kong. Educational Studies. 2015;41(1-2):156-70.
Cordier_2013_IJSLP	A	Cordier R, Munro N, Wilkes-Gillan S, Docking K. The pragmatic language abilities of children with ADHD following a play-based intervention involving peer-to-peer interactions. International Journal of Speech-Language Pathology. 2013;15(4):416-28.
Coster_2004_APMR	A	Coster WJ, Haley SM, Ludlow LH, Andres PL, Ni PS. Development of an applied cognition scale to measure rehabilitation outcomes. Archives of Physical Medicine and Rehabilitation. 2004;85(12):2030-5.
Court_2014_JAffDis	A	Court H, Forty L, Jones L, Gordon-Smith K, Jones I, Craddock N, et al. Improving the psychometric utility of the hypomania checklist (HCL-32): A Rasch analysis approach. Journal of Affective Disorders. 2014;152-154(1):448-53.
Covic_2012_BMCPsych	A	Covic T, Cumming SR, Pallant JF, Manolios N, Emery P, Conaghan PG, et al. Depression and anxiety in patients with rheumatoid arthritis: Prevalence rates based on a comparison of the depression, anxiety and stress scale (DASS) and the hospital, anxiety and depression scale (HADS). BMC Psychiatry. 2012;12(1).
Coxon_2015_TRRec	A	Coxon K, Chevalier A, Lo S, Ivers R, Brown J, Keay L. Behind the wheel confidence and naturalistic measures of driving exposure among older drivers. Transportation Research Record2015. p. 35-43.
Crandal_2015_PsyAss	A	Crandal BR, Foster SL, Chapman JE, Cunningham PB, Brennan PA, Whitmore EA. Therapist perception of treatment outcome: Evaluating treatment outcomes among youth with antisocial behavior problems. Psychological Assessment. 2015;27(2):710-25.
Crescioni_2014_OptViSci	A	Crescioni M, Messer DH, Warholak TL, Miller JM, Twelker JD, Harvey EM. Rasch analysis of the student refractive error and eyeglass questionnaire. Optometry and Vision Science. 2014;91(6):624-33.
Cress_2014_JEarInt	A	Cress CJ, Lambert MC, Epstein MH. Item-Based Psychometrics of the Preschool Behavioral and Emotional Rating Scale. Journal of Early Intervention. 2014;36(3):212-22.
Cruickshank_2015_IJRME	A	Cruickshank V, Pedersen S, Hill A, Callingham R. Construction and validation of a survey instrument to determine the gender-related challenges faced by pre-service male primary teachers. International Journal of Research and Method in Education. 2015;38(2):184-99.
Cruz_2015_ActaReuPor	A	Cruz A, Machado P, Hill J, Campos M, Apóstolo J, Marques A, et al. Cross-cultural validation of the Portuguese version of the educational needs assessment tool (PORTENAT). Acta Reumatologica Portuguesa. 2015;2015(3):242-53.
Dadey_2012_PARE	A	Dadey N, Briggs DC. A meta-analysis of growth trends from vertically scaled assessments. Practical Assessment, Research and Evaluation. 2012;17(14):1-14.
Dalton_2011_JPhysiothe	A	Dalton M, Davidson M, Keating J. The Assessment of Physiotherapy Practice (APP) is a valid measure of professional competence of physiotherapy students: A cross-sectional study with Rasch analysis. Journal of Physiotherapy. 2011;57(4):239-45.
Davey_2013_PLOSONE	A	Davey CJ, Harley C, Elliott DB. Levels of State and Trait Anxiety in Patients Referred to Ophthalmology by Primary Care Clinicians: A Cross Sectional Study. PLoS ONE. 2013;8(6).
Davis_2011_JAM	A	Davis MF, Adam M, Carvajal S, Sechrest L, Reyna VF. Using rasch modeling to measure acculturation in youth. Journal of Applied Measurement. 2011;12(4):324-38.
DawsonTunik_2002_IJBehDev_B	A	Dawson TL. New tools, new insights: Kohlberg's moral judgement stages revisited. International Journal of Behavioral Development. 2002;26(2):154-66.
DawsonTunik_2002_JAM_A	A	Dawson TL. A comparison of three developmental stage scoring systems. Journal of Applied Measurement. 2002;3(2):146-89.
DawsonTunik_2003_CogDev_A	A	Dawson TL, Xie YY, Wilson M. Domain-general and domain-specific developmental assessments: Do they measure the same thing? Cognitive Development. 2003;18(1):61-78.
DawsonTunik_2004_GSGPM	A	Dawson-Tunik TL. "A good education is. . . ." the development of evaluative thought across the life span. Genetic, Social, and General Psychology Monographs. 2004;130(1).
DawsonTunik_2005_EJDPsy	A	Dawson-Tunik TL, Commons M, Wilson M, Fischer KW. The shape of development. European Journal of Developmental Psychology. 2005;2(2):163-95.
deBruin_2005_SAJP	A	De Bruin GP, Taylor N. Development of the sources of work stress inventory. South African Journal of Psychology. 2005;35(4):748-65.
deBruin_2013_SAJIP	A	de Bruin GP, Hill C, Henn CM, Muller KP. Dimensionality of the UWES-17: An item response modelling analysis. SA Journal of Industrial Psychology. 2013;39(2 SPL).
deKlerk_2013_SAJIP	A	de Klerk M, Nel JA, Hill C, Koekemoer E. The development of the MACE work-family enrichment instrument. SA Journal of Industrial Psychology. 2013;39(2 SPL).
DeMars_2004_JAM_B	A	Demars CE. Measuring higher education outcomes with a multidimensional rasch model. Journal of Applied Measurement. 2004;5(4):350-61.
Dencker_2015_HQoLO	A	Dencker A, Sunnerhagen KS, Taft C, Lundgren-Nilsson A. Multidimensional fatigue inventory and post-polio syndrome - a Rasch analysis. Health and Quality of Life Outcomes. 2015;13(20).
Deneen_2013_APJTeaEdu	A	Deneen C, Brown GTL, Bond TG, Shroff R. Understanding outcome-based education changes in teacher education: evaluation of a new instrument with preliminary findings. Asia-Pacific Journal of Teacher Education. 2013;41(4):441-56.
Denehy_2013_PT	A	Denehy L, de Morton NA, Skinner EH, Edbrooke L, Haines K, Warrillow S, et al. A physical function test for use in the intensive care unit: Validity, responsiveness, and predictive utility of the physical function ICU test (scored). Physical Therapy. 2013;93(12):1644-5.
Deng_2015_QoLR	A	Deng N, Anatchkova MD, Waring ME, Han KT, Ware JE. Testing item response theory invariance of the standardized Quality-of-life Disease Impact Scale (QDIS®) in acute coronary syndrome patients: differential functioning of items and test. Quality of Life Research. 2015;24(8):1809-22.
Densley_2013_QoLR	A	Densley K, Davidson S, Gunn JM. Evaluation of the Social Participation Questionnaire in adult patients with depressive symptoms using Rasch analysis. Quality of Life Research. 2013;22(8):1987-97.
deQueiroz_2013_EstuPsic	A	de Queiroz OA, Primi R, Carvalho LdF, Enumo SRF. Employment of Item Response Theory to measure change in Children's Analogical Thinking Modifiability Test. Estudos de Psicologia. 2013;30(4):479-86.
Desouza_2004_SciEdu	A	Desouza JM, Boone WJ, Yilmaz O. A Study of Science Teaching Self-Efficacy and Outcome Expectancy Beliefs of Teachers in India. Science Education. 2004;88(6):837-54.
diGennaro_2013_AssWri	A	di Gennaro K. How different are they? A comparison of Generation 1.5 and international L2 learners' writing ability. Assessing Writing. 2013;18(2):154-72.
Dillard_2013_PDTRT	A	Dillard CL, Salekin RT, Barker ED, Grimes RD. Psychopathy in adolescent offenders: An item response theory study of the antisocial process screening device-self report and the Psychopathy Checklist: Youth Version. Personality Disorders: Theory, Research, and Treatment. 2013;4(2):101-20.
Ding_2014_PRSTPER	A	Ding L. Seeking missing pieces in science concept assessments: Reevaluating the Brief Electricity and Magnetism Assessment through Rasch analysis. Physical Review Special Topics - Physics Education Research. 2014;10(1).
DiPietro_2014_PT	A	Di Pietro F, Catley MJ, McAuley JH, Parkitny L, Maher CG, Da Costa LCM, et al. Rasch analysis supports the use of the pain self-efficacy questionnaire. Physical Therapy. 2014;94(1):91-100.
DiStefano_2014_JEarInt	A	DiStefano C, Greer FW, Kamphaus RW, Brown WH. Using Rasch Rating Scale Methodology to Examine a Behavioral Screener for Preschoolers At Risk. Journal of Early Intervention. 2014;36(3):192-211.
Djaja_2014_HQoLO	A	Djaja N, Youl P, Aitken J, Janda M. Evaluation of a skin self examination attitude scale using an item response theory model approach. Health and Quality of Life Outcomes. 2014;12(1).
DoganayErdogan_2015_IJRheDis_A	A	Doganay Erdogan B, Elhan AH, Kaskati OT, Oztuna D, Kucukdeveci AA, Kutlay S, et al. Integrating patient reported outcome measures and computerized adaptive test estimates on the same common metric: an example from the assessment of activities in rheumatoid arthritis. International journal of rheumatic diseases. 2015. Epub 2015/07/15.
DoganayErdogan_2016_JRheu_B	A	Doganay Erdogan B, Leung YY, Pohl C, Tennant A, Conaghan PG. Minimal Clinically Important Difference as Applied in Rheumatology: An OMERACT Rasch Working Group Systematic Review and Critique. The Journal of rheumatology. 2016;43(1):194-202.
Dougherty_2011_IOVS	A	Dougherty BE, Nichols JJ, Nichols KK. Rasch analysis of the Ocular Surface Disease Index (OSDI). Investigative Ophthalmology and Visual Science. 2011;52(12):8630-5.
Doyle_2005_JSLHR	A	Doyle PJ, Hula WD, McNeil MB, Mikolic JM, Matthews C. An application of Rasch analysis to the measurement of communicative functioning. Journal of Speech, Language, and Hearing Research. 2005;48(6):1412-28.
Dragoi_2013_ArthResThe	A	Drǎgoi RG, Ndosi M, Sadlonova M, Hill J, Duer M, Graninger W, et al. Patient education, disease activity and physical function: Can we be more targeted? A cross sectional study among people with rheumatoid arthritis, psoriatic arthritis and hand osteoarthritis. Arthritis Research and Therapy. 2013;15(5).
Drouin_2012_ECRQ	A	Drouin M, Horner SL, Sondergeld TA. Alphabet knowledge in preschool: A Rasch model analysis. Early Childhood Research Quarterly. 2012;27(3):543-54.
Duke_2015_Patient	A	Duke CC, Lynch WD, Smith B, Winstanley J. Validity of a New Patient Engagement Measure: The Altarum Consumer Engagement (ACE) Measure™. Patient. 2015;8(6):559-68.
Dumond_2003_JAM	A	Dumont C, Bertrand R, Fougeyrollas P, Gervais M. Rasch Modeling and the Measurement of Social Participation. Journal of Applied Measurement. 2003;4(4):309-25.
Dunbar_2012_OPhyOpt	A	Dunbar HM, Crossland MD, Bunce C, Egan C, Rubin GS. The effect of low vision rehabilitation in diabetic eye disease: A randomised controlled trial protocol. Ophthalmic and Physiological Optics. 2012;32(4):282-93.
Duncan_2003_APMR	A	Duncan PW, Bode RK, Lai SM, Perera S. Rasch analysis of a new stroke-specific outcome scale: The stroke impact scale. Archives of Physical Medicine and Rehabilitation. 2003;84(7):950-63.
Dunn_2014_AJOT	A	Dunn L, Magalhaes LC, Mancini MC. Internal structure of the children helping out: Responsibilities, expectations, and Supports (CHORES) Measure. American Journal of Occupational Therapy. 2014;68(3):286-95.
DuPlessis_2015_JPsyAfr	A	du Plessis GA, de Bruin GP. Using Rasch modelling to examine the international personality item pool (IPIP) values in action (VIA) measure of character strengths. Journal of Psychology in Africa. 2015;25(6):512-21.
Dye_2013_PT	A	Dye DC, Eakman AM, Bolton KM. Assessing the validity of the dynamic gait index in a balance disorders clinic: An application of rasch analysis. Physical Therapy. 2013;93(6):809-18.
Eakman_2012_AJOT	A	Eakman AM. Measurement characteristics of the Engagement in Meaningful Activities Survey in an age-diverse sample. American Journal of Occupational Therapy. 2012;66(2).
Eakman_2015_JOccSci	A	Eakman AM. The meaningful activity wants and needs assessment: A perspective on life balance. Journal of Occupational Science. 2015;22(2):210-27.
Eckes_2005_LAssQua	A	Eckes T. Examining rater effects in TestDaF writing and speaking performance assessments: A many-facet rasch analysis. Language Assessment Quarterly. 2005;2(3):197-221.
Eckes_2012_LAssQua_A	A	Eckes T. Operational rater types in writing assessment: Linking rater cognition to rater behavior. Language Assessment Quarterly. 2012;9(3):270-92.
Edelen_2014_CliThe	A	Edelen MO, Stucky BD, Sherbourne C, Eberhart N, Lara M. Correspondence between the RAND-negative impact of asthma on quality of life item bank and the marks asthma quality of life questionnaire. Clinical Therapeutics. 2014;36(5):680-8.
Edmonds_2012_JSLHR	A	Edmonds LA, Donovan NJ. Item-level psychometrics and predictors of performance for Spanish/English bilingual speakers on An Object and Action Naming Battery. Journal of Speech, Language, and Hearing Research. 2012;55(2):359-81.
Edmonds_2014_BResMet	A	Edmonds LA, Donovan NJ. Research applications for An Object and Action Naming Battery to assess naming skills in adult Spanish-English bilingual speakers. Behavior Research Methods. 2014;46(2):456-71.
Egerton_2015_QoLR	A	Egerton T, Riphagen II, Nygård AJ, Thingstad P, Helbostad JL. Systematic content evaluation and review of measurement properties of questionnaires for measuring self-reported fatigue among older people. Quality of Life Research. 2015;24(9):2239-55.
Ekbladh_2014_Work	A	Ekbladh E, Fan CW, Sandqvist J, Hemmingsson H, Taylor R. Work environment impact scale: Testing the psychometric properties of the Swedish version. Work. 2014;47(2):213-9.
Ekstrand_2014_PMaR	A	Ekstrand E, Lindgren I, Lexell J, Brogårdh C. Test-retest reliability of the ABILHAND questionnaire in persons with chronic stroke. PM and R. 2014;6(4):324-31.
Elbaum_2011_JAM	A	Elbaum B, Fisher Jr WP, Coulter WA. Measuring schools' efforts to partner with parents of children served under IDEA: Scaling and standard setting for accountability reporting. Journal of Applied Measurement. 2011;12(3):261-78.
Elbaum_2014_JDisPoSt	A	Elbaum B. Challenges in Interpreting Accountability Results for Schools' Facilitation of Parent Involvement Under IDEA. Journal of Disability Policy Studies. 2014;24(4):206-17.
Elhai_2011_JAD	A	Elhai JD, de Francisco Carvalho L, Miguel FK, Palmieri PA, Primi R, Christopher Frueh B. Testing whether posttraumatic stress disorder and major depressive disorder are similar or unique constructs. Journal of Anxiety Disorders. 2011;25(3):404-10.
Emenogu_2005_CJEdu	A	Emenogu BC, Childs RA. Curriculum, translation, and differential functioning of measurement and geometry items. Canadian Journal of Education. 2005;28(1-2):128-46.
Engelhard_2012_JAM	A	Engelhard G, Jr., Behizadeh N. Exploring the alignment of writing self-efficacy with writing achievement using Rasch measurement theory and qualitative methods. Journal of Applied Measurement. 2012;13(2):132-45.
Englund_2014_Assessm	A	Englund JA, Decker SL, Woodlief DT, DiStefano C. Development and Evaluation of an Online, Multicomponent Working Memory Battery. Assessment. 2014;21(5):543-61.
Epstein_2015_JCE	A	Epstein J, Osborne RH, Elsworth GR, Beaton DE, Guillemin F. Cross-cultural adaptation of the Health Education Impact Questionnaire: Experimental study showed expert committee, not back-translation, added value. Journal of Clinical Epidemiology. 2015;68(4):360-9.
Estabrook_2015_PsyAss	A	Estabrook R, Sadler ME, McGue M. Differential item functioning in the Cambridge Mental Disorders in the Elderly (CAMDEX) Depression Scale across middle age and late life. Psychological Assessment. 2015;27(4):1219-33.
Estrada_2011_MilPsy	A	Estrada AX, Probst TM, Brown J, Graso M. Evaluating the psychometric and measurement characteristics of a measure of sexual orientation harassment. Military Psychology. 2011;23(2):220-36.
Evans_2014_JSLanWri	A	Evans NW, Hartshorn KJ, Cox TL, Martin de Jel T. Measuring written linguistic accuracy with weighted clause ratios: A question of validity. Journal of Second Language Writing. 2014;24(1):33-50.
Facteau_2001_JAppPsy	A	Facteau JD, Craig BS. Are performance appraisal ratings from different rating sources comparable? Journal of Applied Psychology. 2001;86(2):215-27.
Fallahpour_2011_OTJROPH_A	A	Fallahpour M, Tham K, Joghataei MT, Eriksson G, Jonsson H. Occupational gaps in everyday life after stroke and the relation to functioning and perceived life satisfaction. OTJR Occupation, Participation and Health. 2011;31(4):200-8.
Fallahpour_2014_JRehMed	A	Fallahpour M, Kottorp A, Nygard L, Lund ML. Perceived difficulty in use of everyday technology in persons with acquired brain injury of different severity: A comparison with controls. Journal of Rehabilitation Medicine. 2014;46(7):635-41.
Fallahpour_2015_SJOT	A	Fallahpour M, Kottorp A, Nygard L, Lund ML. Participation after acquired brain injury: Associations with everyday technology and activities in daily life. Scandinavian Journal of Occupational Therapy. 2015;22(5):366-76.
Fan_2013_OTJROPH	A	Fan CW, Taylor RR, Ekbladh E, Hemmingsson H, Sandqvist J. Evaluating the psychometric properties of a clinical vocational rehabilitation outcome measurement: The assessment of work performance (AWP). OTJR Occupation, Participation and Health. 2013;33(3):125-33.
Farin_2011_PEduCou	A	Farin E, Gramm L, Kosiol D. Development of a questionnaire to assess communication preferences of patients with chronic illness. Patient Education and Counseling. 2011;82(1):81-8.
Farin_2012_PEduCou	A	Farin E, Gramm L, Schmidt E. Taking into account patients' communication preferences: Instrument development and results in chronic back pain patients. Patient Education and Counseling. 2012;86(1):41-8
Farin_2013_HQoLO_A	A	Farin E, Ullrich A, Hauer J. Participation and social functioning in patients with fibromyalgia: Development and testing of a new questionnaire. Health and Quality of Life Outcomes. 2013;11(1).
Farin_2013_PEduCou_C	A	Farin E, Nagl M, Ullrich A. The comprehensibility of health education programs: Questionnaire development and results in patients with chronic musculoskeletal diseases. Patient Education and Counseling. 2013;90(2):239-46.
Farin_2014_QoLR_B	A	Farin E, Nagl M, Gramm L, Heyduck K, Glattacker M. Development and evaluation of the PI-G: A three-scale measure based on the German translation of the PROMIS pain interference item bank. Quality of Life Research. 2014;23(4):1255-65.
Fenwick_2013_PLOSONE	A	Fenwick EK, Xie J, Rees G, Finger RP, Lamoureux EL. Factors associated with knowledge of diabetes in patients with type 2 diabetes using the diabetes knowledge test validated with Rasch analysis. PLoS ONE. 2013;8(12).
Fieo_2011_BMCGer	A	Fieo RA, Austin EJ, Starr JM, Deary IJ. Calibrating ADL-IADL scales to improve measurement accuracy and to extend the disability construct into the preclinical range: A systematic review. BMC Geriatrics. 2011;11.
Filgueiras_2013_EHumDev	A	Filgueiras A, Pires P, Maissonette S, Landeira-Fernandez J. Psychometric properties of the Brazilian-adapted version of the Ages and Stages Questionnaire in public child daycare centers. Early Human Development. 2013;89(8):561-76.
Finger_2011_HQoLO_A	A	Finger RP, Fenwick E, Marella M, Charbel Issa P, Scholl HPN, Holz FG, et al. The relative impact of vision impairment and cardiovascular disease on quality of life: The example of pseudoxanthoma elasticum. Health and Quality of Life Outcomes. 2011;9.
Finger_2011_IOVS_B	A	Finger RP, Fenwick E, Marella M, Dirani M, Holz FG, Chiang PPC, et al. The impact of vision impairment on vision-specific quality of life in Germany. Investigative Ophthalmology and Visual Science. 2011;52(6):3613-9.
Finger_2011_IOVS_C	A	Finger RP, Kupitz DG, Holz FG, Balasubramaniam B, Ramani RV, Lamoureux EL, et al. The impact of the severity of vision loss on vision-related quality of life in india: An evaluation of the IND-VFQ-33. Investigative Ophthalmology and Visual Science. 2011;52(9):6081-8.
Finger_2012_Ophtalmo	A	Finger RP, Fenwick E, Pesudovs K, Marella M, Lamoureux EL, Holz FG. Rasch analysis reveals problems with multiplicative scoring in the macular disease quality of life questionnaire. Ophthalmology. 2012;119(11):2351-7.
FischerHF_2012_MedCar	A	Fischer HF, Wahl I, Fliege H, Klapp BF, Rose M. Impact of cross-calibration methods on the interpretation of a treatment comparison study using 2 depression scales. Medical Care. 2012;50(4):320-6.
FischerHF_2014_QoLR	A	Fischer HF, Klug C, Roeper K, Blozik E, Edelmann F, Eisele M, et al. Screening for mental disorders in heart failure patients using computer-adaptive tests. Quality of Life Research. 2014;23(5):1609-18.
FitzpatrickAR_2001_AMeaEdu	A	Fitzpatrick AR, Lee G, Gao F. Assessing the comparability of school scores across test forms that are not parallel. Applied Measurement in Education. 2001;14(3):285-306.
FitzpatrickR_2003_JCE	A	Fitzpatrick R, Norquist JM, Dawson J, Jenkinson C. Rasch scoring of outcomes of total hip replacement. Journal of Clinical Epidemiology. 2003;56(1):68-74.
FitzpatrickR_2004_QoLR	A	Fitzpatrick R, Norquist JM, Jenkinson C, Reeves BC, Morris RW, Murray DW, et al. A comparison of Rasch with Likert scoring to discriminate between patients' evaluations of total hip replacement surgery. Quality of Life Research. 2004;13(2):331-8.
Fliege_2005_QoLR	A	Fliege H, Becker J, Walter OB, Bjorner JB, Klapp BF, Rose M. Development of a computer-adaptive test for depression (D-CAT). Quality of Life Research. 2005;14(10):2277-91.
Ford_2003_JHHSAdm	A	Ford EW, Wells R, Capper SA. High performance public health: Assessing agencies' strategic management capabilities. Journal of Health and Human Services Administration. 2003;25(4):407-31.
Forero_2014_JCE	A	Forero CG, Adroher ND, Stewart-Brown S, Castellví P, Codony M, Vilagut G, et al. Differential item and test functioning methodology indicated that item response bias was not a substantial cause of country differences in mental well-being. Journal of Clinical Epidemiology. 2014;67(12):1364-74.
Forget_2014_BMCMusDis	A	Forget NJ, Jerosch-Herold C, Shepstone L, Higgins J. Psychometric evaluation of the Disabilities of the Arm, Shoulder and Hand (DASH) with Dupuytren's contracture: Validity evidence using Rasch modeling. BMC Musculoskeletal Disorders. 2014;15(1).
Forkmann_2013_JAffDis_A	A	Forkmann T, Gauggel S, Spangenberg L, Brähler E, Glaesmer H. Dimensional assessment of depressive severity in the elderly general population: Psychometric evaluation of the PHQ-9 using Rasch Analysis. Journal of Affective Disorders. 2013;148(2-3):323-30.
Fortinsky_2003_MedCar	A	Fortinsky RH, Garcia RI, Joseph Sheehan T, Madigan EA, Tullai-Mguinness S. Measuring disability in medicare home care patients application of rasch modeling to the outcome and assessment information set. Medical Care. 2003;41(5):601-15.
Fortus_2014_JRST_B	A	Fortus D, Vedder-Weiss D. Measuring students' continuing motivation for science learning. Journal of Research in Science Teaching. 2014;51(4):497-522.
Franchignoni_2011_ManThe	A	Franchignoni F, Ferriero G, Giordano A, Sartorio F, Vercelli S, Brigatti E. Psychometric properties of QuickDASH - A classical test theory and Rasch analysis study. Manual Therapy. 2011;16(2):177-82.
Franchignoni_2012_CliRheu_A	A	Franchignoni F, Salaffi F, Giordano A, Ciapetti A, Carotti M, Ottonello M. Psychometric properties of self-administered Lequesne Algofunctional Indexes in patients with hip and knee osteoarthritis: An evaluation using classical test theory and Rasch analysis. Clinical Rheumatology. 2012;31(1):113-21.
Franchignoni_2013_JNeuNeuPsy_B	A	Franchignoni F, Mora G, Giordano A, Volanti P, Chiò A. Evidence of multidimensionality in the ALSFRS-R Scale: A critical appraisal on its measurement properties using Rasch analysis. Journal of Neurology, Neurosurgery and Psychiatry. 2013;84(12):1340-5.
Franchignoni_2014_JRehMed_B	A	Franchignoni F, Giordano A, Ronconi G, Rabini A, Ferriero G. Rasch validation of the Activities-specific Balance Confidence Scale and its short versions in patients with Parkinson's disease. Journal of Rehabilitation Medicine. 2014;46(6):532-9.
Franchignoni_2015_ALSFD_A	A	Franchignoni F, Mandrioli J, Giordano A, Ferro S, Fini N, Georgoulopoulou E, et al. A further Rasch study confirms that ALSFRS-R does not conform to fundamental measurement requirements. Amyotrophic Lateral Sclerosis and Frontotemporal Degeneration. 2015;16(5-6):331-7.
Franchignoni_2015_EJPRM_B	A	Franchignoni F, Godi M, Guglielmetti S, Nardone A, Giordano A. Enhancing the usefulness of the Mini-BESTest for measuring dynamic balance: A Rasch validation study. European Journal of Physical and Rehabilitation Medicine. 2015;51(4):429-37.
Franchignoni_2015_JRehMed_C	A	Franchignoni F, Monticone M, Giordano A, Rocca B. Rasch validation of the prosthetic mobility questionnaire: A new outcome measure for assessing mobility in people with lower limb amputation. Journal of Rehabilitation Medicine. 2015;47(5):460-5.
FredrikssonLarsson_2015_JNurMea	A	Fredriksson-Larsson U, Brink E, Alsén P, Falk K, Lundgren-Nilsson Å. Psychometric analysis of the Multidimensional Fatigue Inventory in a sample of persons treated for myocardial infarction. Journal of nursing measurement. 2015;23(1):154-67.
Fujino_2015_JOccHea	A	Fujino Y, Uehara M, Izumi H, Nagata T, Muramatsu K, Kubo T, et al. Development and validity of a work functioning impairment scale based on the Rasch model among Japanese workers. Journal of Occupational Health. 2015;57(6):521-31.
Fulmer_2015_IJSMatEdu_A	A	Fulmer GW. VALIDATING PROPOSED LEARNING PROGRESSIONS ON FORCE AND MOTION USING THE FORCE CONCEPT INVENTORY: FINDINGS FROM SINGAPORE SECONDARY SCHOOLS. International Journal of Science and Mathematics Education. 2015;13(6):1235-54.
Fulmer_2015_JAM_B	A	Fulmer GW, Lang QC. Testing the multidimensionality in teacher interpersonal behavior: Validating the Questionnaire on Teacher Interaction using the Rasch measurement model. Journal of Applied Measurement. 2015;16(4):416-31.
Gabales_2011_JCogPsy	A	Gabales L, Birney DP. Are the limits in processing and storage capacity common? Exploring the additive and interactive effects of processing and storage load in working memory. Journal of Cognitive Psychology. 2011;23(3):322-41.
Gallegos_2011_CPTL	A	Gallegos PJ, Peeters JM. A measure of teamwork perceptions for team-based learning. Currents in Pharmacy Teaching and Learning. 2011;3(1):30-5.
GanglmairWooliscroft_2013_JBusRes	A	Ganglmair-Wooliscroft A, Wooliscroft B. A cross-cultural application of the Affective Response to Consumption scale: Investigating US-American and Austrian passengers on long-haul flights. Journal of Business Research. 2013;66(6):765-70.
Garner_2015_JAM	A	Garner M, Kokan J, Annis K, Baker M, Phillips M, Head C, et al. Development and analysis of a scale for measuring Teachers' Sense of Efficacy in Urban Schools (SEUS). Journal of Applied Measurement. 2015;16(4):401-15.
Gauggel_2004_RehPsy	A	Gauggel S, Böcker M, Heinemann AW, Lämmler G, Borchelt M, Steinhagen-Thiessen E. Patient-Staff Agreement on Barthel Index Scores at Admission and Discharge in a Sample of Elderly Stroke Patients. Rehabilitation Psychology. 2004;49(1):21-7.
Gerber_2002_JAM	A	Gerber B, Smith EV, Jr., Girotti M, Pelaez L, Lawless K, Smolin L, et al. Using Rasch measurement to investigate the cross-form equivalence and clinical utility of Spanish and English versions of a Diabetes Questionnaire: A pilot study. Journal of Applied Measurement. 2002;3(3):243-71.
Gerrard_2013_APMR	A	Gerrard P, Goldstein R, Divita MA, Ryan CM, Mix J, Niewczyk P, et al. Validity and reliability of the FIM instrument in the inpatient burn rehabilitation population. Archives of Physical Medicine and Rehabilitation. 2013;94(8):1521-6.
Gershon_2012_QoLR	A	Gershon RC, Lai JS, Bode R, Choi S, Moy C, Bleck T, et al. Neuro-QOL: Quality of life item banks for adults with neurological disorders: Item development and calibrations based upon clinical and general population testing. Quality of Life Research. 2012;21(3):475-86.
GibbonsCJ_2011_HQoLO	A	Gibbons CJ, Mills RJ, Thornton EW, Ealing J, Mitchell JD, Shaw PJ, et al. Rasch analysis of the hospital anxiety and depression scale (hads) for use in motor neurone disease. Health and Quality of Life Outcomes. 2011;9.
GibbonsCJ_2013_ALSFD_A	A	Gibbons C, Thornton E, Ealing J, Shaw P, Talbot K, Tennant A, et al. The impact of fatigue and psychosocial variables on quality of life for patients with motor neuron disease. Amyotrophic Lateral Sclerosis and Frontotemporal Degeneration. 2013;14(7-8):537-45.
GibbonsCJ_2013_JNeuroSci_B	A	Gibbons CJ, Thornton EW, Ealing J, Shaw PJ, Talbot K, Tennant A, et al. Assessing social isolation in motor neurone disease: A Rasch analysis of the MND Social Withdrawal Scale. Journal of the Neurological Sciences. 2013;334(1-2):112-8.
GibbonsCJ_2013_PLOSONE_C	A	Gibbons CJ, Kenning C, Coventry PA, Bee P, Bundy C, Fisher L, et al. Development of a Multimorbidity Illness Perceptions Scale (MULTIPleS). PLoS ONE. 2013;8(12).
GibbonsLE_2011_QoLR	A	Gibbons LE, Feldman BJ, Crane HM, Mugavero M, Willig JH, Patrick D, et al. Migrating from a legacy fixed-format measure to CAT administration: Calibrating the PHQ-9 to the PROMIS depression measures. Quality of Life Research. 2011;20(9):1349-57.
GijonNogueron_2014_QoLR	A	Gijon-Nogueron G, Ndosi M, Luque-Suarez A, Alcacer-Pitarch B, Munuera PV, Garrow A, et al. Cross-cultural adaptation and validation of the Manchester Foot Pain and Disability Index into Spanish. Quality of Life Research. 2014;23(2):571-9.
Gilbert_2015_POQ	A	Gilbert EE. A comparison of branched versus unbranched rating scales for the measurement of attitudes in surveys. Public Opinion Quarterly. 2015;79(2):443-70.
Giri_2014_BDB	A	Giri S, Commons ML, Harrigan WJ. There is only one stage domain. Behavioral Development Bulletin. 2014;19(4):51-61.
Glad_2014_RSWP	A	Glad J, Kottorp A, Jergeby U, Gustafsson C, Sonnander K. Psychometric Properties of the HOME Inventory Using Rasch Analysis. Research on Social Work Practice. 2014;24(2):235-46.
Glenny_2012_APMR	A	Glenny C, Stolee P, Thompson M, Husted J, Berg K. Underestimating physical function gains: Comparing FIM motor subscale and interRAI post acute care activities of daily living scale. Archives of Physical Medicine and Rehabilitation. 2012;93(6):1000-8.
Glynn_2012_JRST	A	Glynn SM. International assessment: A Rasch model and teachers' evaluation of TIMSS science achievement items. Journal of Research in Science Teaching. 2012;49(10):1321-44.
Gnambs_2014_EJPA	A	Gnambs T, Hanfstingl B. A differential item functioning analysis of the German Academic Self-Regulation Questionnaire for adolescents. European Journal of Psychological Assessment. 2014;30(4):251-60.
Goedert_2012_APMR	A	Goedert KM, Chen P, Botticello A, Masmela JR, Adler U, Barrett AM. Psychometric evaluation of neglect assessment reveals motor-exploratory predictor of functional disability in acute-stage spatial neglect. Archives of Physical Medicine and Rehabilitation. 2012;93(1):137-42.
Goldstein_2015_JAMAOph	A	Goldstein JE, Jackson ML, Fox SM, Deremeik JT, Massof RW. Clinically meaningful rehabilitation outcomes of low vision patients served by outpatient clinical centers. JAMA Ophthalmology. 2015;133(7):762-9.
Golia_2014_EJASA	A	Golia S, Pedrazza M. Assessing the relational competence as the core dimension of social worker's perceived self-efficacy through the rasch model. Electronic Journal of Applied Statistical Analysis. 2014;7(1):58-80.
Golino_2014_BDB	A	Golino HF, Gomes CMA, Commons ML, Miller PM. The construction and validation of a developmental test for stage identification: Two exploratory studies. Behavioral Development Bulletin. 2014;19(3):37-54.
GomezLE_2012_JIDevDis	A	Gómez LE, Arias B, Verdugo MÁ, Navas P. Application of the Rasch rating scale model to the assessment of quality of life of persons with intellectual disability. Journal of Intellectual and Developmental Disability. 2012;37(2):141-50.
GonzalezdePaz_2012_JCliNur	A	González-de Paz L, Kostov B, Sisó-Almirall A, Zabalegui-Yárnoz A. A Rasch analysis of nurses' ethical sensitivity to the norms of the code of conduct. Journal of Clinical Nursing. 2012;21(19-20):2747-60.
Goodwin_2012_LanTes	A	Goodwin AP, Huggins AC, Carlo M, Malabonga V, Kenyon D, Louguit M, et al. Development and validation of extract the base: An english derivational morphology test for third through fifth grade monolingual students and spanish-speaking english language learners. Language Testing. 2012;29(2):265-89.
Gothwal_2011_CEOpt_A	A	Gothwal VK, Wright TA, Lamoureux EL, Pesudovs K. Multiplicative rating scales do not enable measurement of vision-related quality of life. Clinical and Experimental Optometry. 2011;94(1):52-62.
Gothwal_2011_JCRefSur_B	A	Gothwal VK, Wright TA, Lamoureux EL, Khadka J, McAlinden C, Pesudovs K. Improvements in visual ability with first-eye, second-eye, and bilateral cataract surgery measured with the Visual Symptoms and Quality of Life Questionnaire. Journal of Cataract and Refractive Surgery. 2011;37(7):1208-16.
Gothwal_2012_IOVS_A	A	Gothwal VK, Reddy SP, Sumalini R, Bharani S, Bagga DK. National eye institute visual function questionnaire or Indian vision function questionnaire for visually impaired: A conundrum. Investigative Ophthalmology and Visual Science. 2012;53(8):4730-8.
Gothwal_2012_OphEpi_B	A	Gothwal VK, Bagga DK. Andhra Pradesh Eye Disease Study Visual Function Questionnaire: Further improvements in psychometric properties using Rasch analysis. Ophthalmic Epidemiology. 2012;19(5):306-16.
Gothwal_2012_OptViSci_C	A	Gothwal VK, Sumalini R, Bharani S, Reddy SP, Bagga DK. The second version of the L. V. Prasad-Functional vision questionnaire. Optometry and Vision Science. 2012;89(11):1601-10.
Gothwal_2013_IOVS_A	A	Gothwal VK, Reddy SP, Fathima A, Bharani S, Sumalini R, Bagga DK, et al. Assessment of the impact of keratoconus on vision-related quality of life. Investigative Ophthalmology and Visual Science. 2013;54(4):2902-10.
Gothwal_2013_IOVS_B	A	Gothwal VK, Bagga DK. Vision and quality of life index: Validation of the Indian version using rasch analysis. Investigative Ophthalmology and Visual Science. 2013;54(7):4871-81.
Gothwal_2013_QoLR_C	A	Gothwal VK, Srinivas M, Rao GN. A new look at the WHOQOL as health-related quality of life instrument among visually impaired people using Rasch analysis. Quality of Life Research. 2013;22(4):839-51.
Gothwal_2014_JAffDis	A	Gothwal VK, Bagga DK, Sumalini R. Rasch validation of the PHQ-9 in people with visual impairment in South India. Journal of Affective Disorders. 2014;167:171-7.
Gothwal_2015_IOVS_A	A	Gothwal VK, Bharani S, Mandal AK. Quality of life of caregivers of children with congenital glaucoma: Development and validation of a novel questionnaire (CarCGQoL). Investigative Ophthalmology and Visual Science. 2015;56(2):770-7.
Gothwal_2015_PLOSONE_B	A	Gothwal VK, Bharani S, Reddy SP. Measuring coping in parents of children with disabilities: A Rasch model approach. PLoS ONE. 2015;10(3).
Gothwal_2015_PLOSONE_C	A	Gothwal VK, Bharani S, Kekunnaya R, Chhablani P, Sachdeva V, Pehere NK, et al. Measuring health-related quality of life in strabismus: A modification of the adult strabismus-20 (AS-20) questionnaire using rasch analysis. PLoS ONE. 2015;10(5).
Graham_2015_JPAssEdu	A	Graham K, Beltyukova S. Development and initial validation of a measure of intention to stay in academia for physician assistant faculty. Journal of Physician Assistant Education. 2015;26(1):10-8.
Graticelli_2015_JAMAOph	A	Gracitelli CPB, Abe RY, Tatham AJ, Rosen PN, Zangwill LM, Boer ER, et al. Association between progressive retinal nerve fiber layer loss and longitudinal change in quality of life in glaucoma. JAMA Ophthalmology. 2015;133(4):384-90.
Graves_2004_JAM_A	A	Graves RE, Weinstein S. A Rasch Analysis of Three of the Wisconsin Scales of Psychosis Proneness: Measurement of Schizotypy. Journal of Applied Measurement. 2004;5(2):160-71.
Greaves_2013_DMCN	A	Greaves S, Imms C, Dodd K, Krumlinde-Sundholm L. Development Of The Mini-Assisting Hand Assessment: Evidence For Content And Internal Scale Validity. Developmental Medicine and Child Neurology. 2013;55(11):1030-7.
Greene_2015_APMR	A	Greene HA, Rapport LJ, Millis SR, Hanks RA, Williams MW. Rasch analysis of the coping inventory for stressful situations in individuals with moderate to severe traumatic brain injury. Archives of Physical Medicine and Rehabilitation. 2015;96(4):659-66.
Grijalva_2015_PsyBul	A	Grijalva E, Newman DA, Tay L, Brent Donnellan M, Harms PD, Robins RW, et al. Gender differences in narcissism: A meta-analytic review. Psychological Bulletin. 2015;141(2):261-310.
Grill_2013_JVesRes	A	Grill E, Furman JM, Alghwiri AA, Muller M, Whitney SL. Using core sets of the international classification of functioning, disability and health (ICF) to measure disability in vestibular disorders: Study protocol. Journal of Vestibular Research: Equilibrium & Orientation. 2013;23(6):297-303.
Grimfors_2014_JCRefSur	A	Grimfors M, Mollazadegan K, Lundström M, Kugelberg M. Ocular comorbidity and self-assessed visual function after cataract surgery. Journal of Cataract and Refractive Surgery. 2014;40(7):1163-9.
Gross_2015_ResAgi_B	A	Gross AL, Jones RN, Inouye SK. Development of an Expanded Measure of Physical Functioning for Older Persons in Epidemiologic Research. Research on Aging. 2015;37(7):671-94.
Grossschedl_2014_IJSE	A	Großschedl J, Mahler D, Kleickmann T, Harms U. Content-Related Knowledge of Biology Teachers from Secondary Schools: Structure and learning opportunities. International Journal of Science Education. 2014;36(14):2335-66.
Guillemin_2012_OcuSur	A	Guillemin I, Begley C, Chalmers R, Baudouin C, Arnould B. Appraisal of patient-reported outcome instruments available for randomized clinical trials in dry eye: Revisiting the standards. Ocular Surface. 2012;10(2):84-99.
Guillen_2015_AnaPsi	A	Guillén VM, Verdugo MÁ, Arias B, Vicente E. Development of a support needs assessment scale for children and adolescents with intellectual disabilities. Anales de Psicologia. 2015;31(1):137-44.
Gutheil_2011_JPsyLaw	A	Gutheil TG, Miller PM, Commons ML. Attorney preparedness as judged by experts: An empirical pilot study. Journal of Psychiatry and Law. 2011;39(3):397-409.
Haans_2012_ActaPsy_A	A	Haans A, Kaiser FG, Bouwhuis DG, Ijsselsteijn WA. Individual differences in the rubber-hand illusion: Predicting self-reports of people's personal experiences. Acta Psychologica. 2012;141(2):169-77.
Haans_2014_JEnvPsy	A	Haans A. The natural preference in people's appraisal of light. Journal of Environmental Psychology. 2014;39:51-61.
Hadley_2013_Neurosur	A	Hadley MN, Walters BC, Aarabi B, Dhall SS, Gelb DE, Hurlbert RJ, et al. Clinical assessment following acute cervical spinal cord injury. Neurosurgery. 2013;72(SUPPL.2):40-53.
Hadzibajramovic_2015_BMCPH_A	A	Hadzibajramovic E, Ahlborg G, Grimby-Ekman A, Lundgren-Nilsson Å. Internal construct validity of the stress-energy questionnaire in a working population, a cohort study. BMC Public Health. 2015;15(1).
Hadzibajramovic_2015_SJPH_B	A	Hadzibajramovic E, Ahlborg G, Hakansson C, Lundgren Nilsson A, Grimby Ekman A. Affective stress responses during leisure time: Validity evaluation of a modified version of the Stress-Energy Questionnaire. Scandinavian Journal of Public Health. 2015;43(8):825-32.
Hagell_2003_MovDis	A	Hagell P, Whalley D, McKenna SP, Lindvall O. Health status measurement in Parkinson's disease: Validity of the PDQ-39 and Nottingham Health Profile. Movement Disorders. 2003;18(7):773-83.
Haggerty_2011_HPol	A	Haggerty JL, Lévesque JF, Santor DA, Burge F, Beaulieu C, Bouharaoui F, et al. Accessibility from the patient perspective: Comparison of primary healthcare evaluation instruments. Healthcare Policy. 2011;7(SPEC. ISSUE):94-107.
HahnEA_2005_EHP	A	Hahn EA, Holzner B, Kemmler G, Sperner-Unterweger B, Hudgens SA, Cella D. Cross-cultural evaluation of health status using item response theory: Fact-B comparisons between Austrian and U.S. patients with breast cancer. Evaluation and the Health Professions. 2005;28(2):233-59.
Haley_2004_APMR_B	A	Haley SM, Andres PL, Coster WJ, Kosinski M, Ni P, Jette AM. Short-form activity measure for post-acute care. Archives of Physical Medicine and Rehabilitation. 2004;85(4):649-60.
Haley_2011_APMR	A	Haley SM, Ni P, Lai JS, Tian F, Coster WJ, Jette AM, et al. Linking the activity measure for post acute care and the quality of life outcomes in neurological disorders. Archives of Physical Medicine and Rehabilitation. 2011;92(10 SUPPL.).
Hamilton_2015_HQoLO	A	Hamilton CB, Maly MR, Giffin JR, Clark JM, Speechley M, Petrella RJ, et al. Validation of the Questionnaire to Identify Knee Symptoms (QuIKS) using Rasch analysis. Health and Quality of Life Outcomes. 2015;13(1).
Hammond_2015_Rheu	A	Hammond A, Tennant A, Tyson SF, Nordenskiöld U, Hawkins R, Prior Y. The reliability and validity of the English version of the Evaluation of Daily Activity Questionnaire for people with rheumatoid arthritis. Rheumatology (United Kingdom). 2015;54(9):1605-15.
Handa_2004_NeuUro	A	Handal VL, Massof RW. Measuring the Severity of Stress Urinary Incontinence Using the Incontinence Impact Questionnaire. Neurourology and Urodynamics. 2004;23(1):27-32.
Hansen_2014_IJTheReh	A	Hansen T. Further validation of the Danish version of the McGill Ingestive Skills Assessment (MISA-DK): Rasch analysis. International Journal of Therapy and Rehabilitation. 2014;21(1):26-34.
Harder_2014_HiAbStu	A	Harder B, Vialle W, Ziegler A. Conceptions of giftedness and expertise put to the empirical test. High Ability Studies. 2014;25(2):83-120.
Hardigan_2015_JAM	A	Hardigan PC, Cohen SR, Hagen KP. The reliability and validity of the Power-Load-Margin Inventory: A Rasch analysis. Journal of Applied Measurement. 2015;16(4):443-53.
Haroz_2014_JAffDis	A	Haroz EE, Ybarra ML, Eaton WW. Psychometric evaluation of a self-report scale to measure adolescent depression: The CESDR-10 in two national adolescent samples in the United States. Journal of Affective Disorders. 2014;158:154-60.
HarrisHaywood_2014_MedCar	A	Harris-Haywood S, Goode T, Gao Y, Smith K, Bronheim S, Flocke SA, et al. Psychometric evaluation of a cultural competency assessment instrument for health professionals. Medical Care. 2014;52(2).
HartDL_2005_JCE	A	Hart DL, Mioduski JE, Stratford PW. Simulated computerized adaptive tests for measuring functional status were efficient with good discriminant validity in patients with hip, knee, or foot/ankle impairments. Journal of Clinical Epidemiology. 2005;58(6):629-38.
Hasford_2011_JABusRes	A	Hasford J, Bradley KD. Validating measures of self control via rasch measurement. Journal of Applied Business Research. 2011;27(6):45-55.
Hawthorne_2014_JCE	A	Hawthorne G, Sansoni J, Hayes L, Marosszeky N, Sansoni E. Measuring patient satisfaction with health care treatment using the Short Assessment of Patient Satisfaction measure delivered superior and robust satisfaction estimates. Journal of Clinical Epidemiology. 2014;67(5):527-37.
Hays_2015_JGIM	A	Hays RD, Spritzer KL, Thompson WW, Cella D. U.S. General Population Estimate for “Excellent” to “Poor” Self-Rated Health Item. Journal of General Internal Medicine. 2015;30(10):1511-6.
Hecimovich_2014_BMCRN_A	A	Hecimovich MD, Styles I, Volet SE. Development and psychometric evaluation of scales to measure professional confidence in manual medicine: A Rasch measurement approach. BMC Research Notes. 2014;7(1).
Hecimovich_2014_PsySpoExe_B	A	Hecimovich MD, Peiffer JJ, Harbough AG. Development and psychometric evaluation of a post exercise exhaustion scale utilising the Rasch measurement model. Psychology of Sport and Exercise. 2014;15(6):569-79.
Heinemann_2015_JSCM	A	Heinemann AW, Kisala PA, Hahn EA, Tulsky DS. Development and psychometric characteristics of the SCI-QOL Ability to Participate and Satisfaction with Social Roles and Activities item banks and short forms. Journal of Spinal Cord Medicine. 2015;38(3):397-408.
Hendriks_2012_AMedJou	A	Hendriks J, Fyfe S, Styles I, Rachel Skinner S, Merriman G. Scale construction utilising the Rasch unidimensional measurement model: A measurement of adolescent attitudes towards abortion. Australasian Medical Journal. 2012;5(5):251-61.
Hermans_2013_MusNer	A	Hermans MCE, Merkies ISJ, Laberge L, Blom EW, Tennant A, Faber CG. Fatigue and daytime sleepiness scale in myotonic dystrophy type 1. Muscle and Nerve. 2013;47(1):89-95.
Hermansson_2005_JRehMed	A	Hermansson LM, Fisher AG, Bernspång B, Eliasson AC. Assessmet of Capacity for Myoelectric Control: A new Rasch-built measure of prosthetic hand control. Journal of Rehabilitation Medicine. 2005;37(3):166-71.
HerrmannAbell_2011_CERP	A	Herrmann-Abell CF, DeBoer GE. Using distractor-driven standards-based multiple-choice assessments and Rasch modeling to investigate hierarchies of chemistry misconceptions and detect structural problems with individual items. Chemistry Education Research and Practice. 2011;12(2):184-92.
Hibbard_2004_HSRes	A	Hibbard JH, Stockard J, Mahoney ER, Tusler M. Development of the patient activation measure (PAM): Conceptualizing and measuring activation in patients and consumers. Health Services Research. 2004;39(4 I):1005-26.
Hickman_2004_JCriJus	A	Hickman MJ, Piquero NL, Piquero AR. The validity of Niederhoffer's cynicism scale. Journal of Criminal Justice. 2004;32(1):1-13.
Hillege_2011_TIJFMHea	A	Hillege S, de Ruiter C, Smits N, van der Baan H, Das J. Structural and metric validity of the Dutch translation of Psychopathy Checklist: Youth Version (PCL:YV). The International Journal of Forensic Mental Health. 2011;10(4):346-57.
HillTM_2013_JAOffCou	A	Hill TM, Laux JM, Stone G, Dupuy P, Scott H. A rasch analysis of the substance abuse subtle screening inventory-3. Journal of Addictions and Offender Counseling. 2013;34(1):40-50.
Hincapie_2012_PhaPra	A	Hincapie AL, Yandow S, Hines S, Martineau M, Warholak T. Job satisfaction among chain community pharmacists: Results from a pilot study. Pharmacy Practice. 2012;10(4):227-33.
Hincapie_2015_JMCP	A	Hincapie AL, Taylor AM, Boesen KP, Warholak T. Understanding reasons for nonadherence to medications in a medicare Part D beneficiary sample. Journal of Managed Care Pharmacy. 2015;21(5):391-9.
Hissbach_2011_BMCMedEdu	A	Hissbach JC, Klusmann D, Hampe W. Dimensionality and predictive validity of the HAM-Nat, a test of natural sciences for medical school admission. BMC Medical Education. 2011;11(1).
Hlavinkova_2014_IJPubHea	A	Hlavinkova L, Mentel A, Kollarova J, Kristufkova Z. Effectiveness of a prevention campaign on HIV/AIDS knowledge among adolescents in Eastern Slovakia. International Journal of Public Health. 2014;59(6):905-11.
HoFC_2014_EduPsy	A	Ho FC, Yan Z. Identification of the patterns of Chinese character recognition in students with learning disabilities requiring Tier-2 support: A Rasch analysis. Educational Psychology. 2014;34(3):305-22.
Hoffman_2012_JSLHR	A	Hoffman L, Templin J, Rice ML. Linking outcomes from peabody picture vocabulary test forms using item response models. Journal of Speech, Language, and Hearing Research. 2012;55(3):754-63.
Hollar_2012_JAM	A	Hollar D, Hobgood C, Foster B, Aleman M, Sawning S. Concurrent validation of CHIRP, a new instrument for measuring healthcare student attitudes towards interdisciplinary teamwork. Journal of Applied Measurement. 2012;13(4):360-75.
Holloway_2014_JAdvNur	A	Holloway A, Blackman I, Flynn F. A study examining the appropriateness of a self-rated alcohol-related clinical confidence tool as a method of measurement among registered hospital nurses using Rasch analysis. Journal of Advanced Nursing. 2014;70(4):937-45.
Holmefur_2015_QoLR	A	Holmefur M, Sundberg K, Wettergren L, Langius-Eklöf A. Measurement properties of the 13-item sense of coherence scale using Rasch analysis. Quality of Life Research. 2015;24(6):1455-63.
Homer_2012_AEHEdu	A	Homer M, Darling J, Pell G. Psychometric characteristics of integrated multi-specialty examinations: Ebel ratings and unidimensionality. Assessment and Evaluation in Higher Education. 2012;37(7):787-804.
Hong_2005_EaPM	A	Hong S, Wong EC. Rasch rating scale modeling of the Korean version of the beck depression inventory. Educational and Psychological Measurement. 2005;65(1):124-39.
Hossain_2014_IEEEAcc	A	Hossain G, Yeasin M. Cognitive ability-demand gap analysis with latent response models. IEEE Access. 2014;2:711-24.
Hostetler_2012_JGLBTFS	A	Hostetler AJ. Singlehood and Subjective Well-Being among Mature Gay Men: The Impact of Family, Friends, and of Being "Single by Choice". Journal of GLBT Family Studies. 2012;8(4):361-84.
HsiehM_2013_LanTes	A	Hsieh M. An application of Multifaceted Rasch measurement in the Yes/No Angoff standard setting procedure. Language Testing. 2013;30(4):491-512.
HuangJH_2011_JGreSys	A	Huang JH, Peng KH. Using rasch model and GRA to assess international tourist hotel industry performance. Journal of Grey System. 2011;23(3):299-310.
HuangJH_2012_TouMan	A	Huang JH, Peng KH. Fuzzy Rasch model in TOPSIS: A new approach for generating fuzzy numbers to assess the competitiveness of the tourism industries in Asian countries. Tourism Management. 2012;33(2):456-65.
Hubert_2015_RDevDis	A	Hubert KC, Sideridis G, Sherlock R, Rosoklija I, Kringle G, Johnson K, et al. Urinary incontinence in spina bifida: Initial instrument validation. Research in Developmental Disabilities. 2015;40:42-50.
Huberty_2013_PsySpoExe	A	Huberty J, Vener J, Gao Y, Matthews JL, Ransdell L, Elavsky S. Developing an instrument to measure physical activity related self-worth in women: Rasch analysis of the Women's Physical Activity Self-Worth Inventory (WPASWI). Psychology of Sport and Exercise. 2013;14(1):111-21.
Huggins_2013_EduAss	A	Huggins AC, Elbaum B. Test Accommodations and Equating Invariance on a Fifth-Grade Science Exam. Educational Assessment. 2013;18(1):49-72.
HungM_2012_FooAnkInt	A	Hung M, Nickisch F, Beals TC, Greene T, Clegg DO, Saltzman CL. New paradigm for patient-reported outcomes assessment in foot & ankle research: Computerized adaptive testing. Foot and Ankle International. 2012;33(8):621-6.
HungM_2013_QoLR	A	Hung M, Carter M, Hayden C, Dzierzon R, Morales J, Snow L, et al. Psychometric assessment of the patient activation measure short form (PAM-13) in rural settings. Quality of Life Research. 2013;22(3):521-9.
HungM_2014_FooAnkInt_B	A	Hung M, Baumhauer JF, Brodsky JW, Cheng C, Ellis SJ, Franklin JD, et al. Psychometric comparison of the PROMIS physical function CAT with the FAAM and FFI for measuring patient-reported outcomes. Foot and Ankle International. 2014;35(6):592-9.
HungM_2014_OJSpoMed_C	A	Hung M, Hon SD, Cheng C, Franklin JD, Aoki SK, Anderson MB, et al. Psychometric evaluation of the lower extremity computerized adaptive test, the modified harris hip score, and the hip outcome score. Orthopaedic Journal of Sports Medicine. 2014;2(12).
HungM_2015_SpiJou	A	Hung M, Cheng C, Hon SD, Franklin JD, Lawrence BD, Neese A, et al. Challenging the norm: Further psychometric investigation of the neck disability index. Spine Journal. 2015;15(11):2440-5.
Inchausti_2014_RPSalMen	A	Inchausti F, Prieto G, Delgado AR. Rasch Analysis of the Spanish version of the Mindful Attention Awareness Scale (MAAS) in a clinical sample. Revista de Psiquiatria y Salud Mental. 2014;7(1):32-41.
Iris_2014_JEAbuNeg	A	Iris M, Conrad KJ, Ridings J. Observational Measure of Elder Self-Neglect. Journal of Elder Abuse and Neglect. 2014;26(4):365-97.
Isacsson_2012_ActaPsySca	A	Isacsson G, Adler M. Randomized clinical trials underestimate the efficacy of antidepressants in less severe depression. Acta Psychiatrica Scandinavica. 2012;125(6):453-9.
Iwai_2011_JPTS	A	Iwai N, Aoyagi Y, Tokuhisa K, Yamamoto J, Shimada T. The gaps between capability ADL and performance ADL of stroke patients in a convalescent rehabilitation ward -based on the functional independence measure. Journal of Physical Therapy Science. 2011;23(2):333-8.
Jackson_2003_AJPhaEdu	A	Jackson TR, Popovich NG. The development, implementation, and evaluation of a self-assessment instrument for use in a pharmacy student competition. American Journal of Pharmaceutical Education. 2003;67(2).
Jackson_2005_AJPhaEdu	A	Jackson TL, McCord AD, Dahdal WY, Zgarrick DP, Brock KA. The use of a scholarship committee to foster scholarly growth of pharmacy practice faculty. American Journal of Pharmaceutical Education. 2005;69(5).
Jain_2015_Spine	A	Jain A, Sponseller PD, Negrini S, Newton PO, Cahill PJ, Bastrom TP, et al. SRS-7: A valid, responsive, linear, and unidimensional functional outcome measure for operatively treated patients with AIS. Spine. 2015;40(9):650-5.
Jalbert_2015_COphRep	A	Jalbert I, Golebiowski B, Stapleton F. Measuring Contact Lens Discomfort. Current Ophthalmology Reports. 2015;3(2):106-10.
JanssenG_2015_AssWri	A	Janssen G, Meier V, Trace J. Building a better rubric: Mixed methods rubric revision. Assessing Writing. 2015;26:51-66.
Jarl_2015_APMR	A	Jarl G, Heinemann AW, Lindner HY, Norling Hermansson LM. Cross-Cultural Validity and Differential Item Functioning of the Orthotics and Prosthetics Users' Survey with Swedish and United States Users of Lower-Limb Prosthesis. Archives of Physical Medicine and Rehabilitation. 2015;96(9):1615-26.
Jervaeus_2013_HQoLO	A	Jervaeus A, Kottorp A, Wettergren L. Psychometric properties of KIDSCREEN-27 among childhood cancer survivors and age matched peers: A Rasch analysis. Health and Quality of Life Outcomes. 2013;11(1).
Ji_2013_JHomosex	A	Ji P, Fujimoto K. Measuring Heterosexual LGBT Ally Development: A Rasch Analysis. Journal of Homosexuality. 2013;60(12):1695-725.
JiangJY_2015_EduRes	A	Jiang JY, Sporte SE, Luppescu S. Teacher Perspectives on Evaluation Reform: Chicago’s REACH Students. Educational Researcher. 2015;44(2):105-16.
Johansson_2014_HQoLO	A	Johansson S, Kottorp A, Lee KA, Gay CL, Lerdal A. Can the Fatigue Severity Scale 7-item version be used across different patient populations as a generic fatigue measure - a comparative study using a Rasch model approach. Health and Quality of Life Outcomes. 2014;12(1).
JohnsonP_2011_JRST	A	Johnson P, Tymms P. The emergence of a learning progression in middle school chemistry. Journal of Research in Science Teaching. 2011;48(8):849-77.
JohnsonP_2013_EduQui	A	Johnson P. A learning progression towards understanding chemical change. Educacion Quimica. 2013;24(4):365-72.
Johnston_2005_JSCM	A	Johnston MV, Diab ME, Kim SS, Kirshblum S. Health literacy, morbidity, and quality of life among individuals with spinal cord injury. Journal of Spinal Cord Medicine. 2005;28(3):230-40.
Jolly_2012_SARhe	A	Jolly M, Pickard AS, Block JA, Kumar RB, Mikolaitis RA, Wilke CT, et al. Disease-specific patient reported outcome tools for systemic lupus erythematosus. Seminars in Arthritis and Rheumatism. 2012;42(1):56-65.
JonesMG_2013_IJSE	A	Jones MG, Paechter M, Yen CF, Gardner G, Taylor A, Tretter T. Teachers' Concepts of Spatial Scale: An international comparison. International Journal of Science Education. 2013;35(14):2462-82.
JonesS_2014_JAfrEco	A	Jones S, Schipper Y, Ruto S, Rajani R. Can your child read and count? Measuring learning outcomes in East Africa. Journal of African Economies. 2014;23(5):643-72.
Joosten_2012_JARIDis	A	Joosten AV, Bundy AC, Einfeld SL. Context Influences the Motivation for Stereotypic and Repetitive Behaviour in Children Diagnosed with Intellectual Disability with and without Autism. Journal of Applied Research in Intellectual Disabilities. 2012;25(3):262-71.
Jorion_2015_JEngEdu	A	Jorion N, Gane BD, James K, Schroeder L, Dibello LV, Pellegrino JW. An Analytic Framework for Evaluating the Validity of Concept Inventory Claims. Journal of Engineering Education. 2015;104(4):454-96.
Jung_2015_SEduEva	A	Jung LA, Bradley KD, Sampson SO, McWilliam RA, Toland MD. Evaluating construct validity and internal consistency of early childhood individualized family service plans. Studies in Educational Evaluation. 2015;45:10-6.
Juttner_2013_EAEvaAcc	A	Jüttner, M., et al., Development and use of a test instrument to measure biology teachers' content knowledge (CK) and pedagogical content knowledge (PCK). Educational Assessment, Evaluation and Accountability, 2013. 25(1): p. 45-67.
Kahler_2004_PAddBeh	A	Kahler CW, Strong DR, Read JP, Palfai TP, Wood MD. Mapping the continuum of alcohol problems in college students: A Rasch model analysis. Psychology of Addictive Behaviors. 2004;18(4):322-33.
Kahler_2005_ACER	A	Kahler CW, Strong DR, Read JP. Toward efficient and comprehensive measurement of the alcohol problems continuum in college students: The brief Young Adult Alcohol Consequences Questionnaire. Alcoholism: Clinical and Experimental Research. 2005;29(7):1180-9.
Karim_2014_IEduStu	A	Karim AA, Shah PM, Din R, Ahmad M, Lubis MA. Developing information skills for Malaysian youth students using rasch analysis. International Education Studies. 2014;7(13):112-22.
Kean_2011_JHTraReh	A	Kean J, Abell M, Malec JF, Trzepacz PT. Rasch analysis of the orientation log and reconsideration of the latent construct during inpatient rehabilitation. Journal of Head Trauma Rehabilitation. 2011;26(5):364-74.
Kelly_2015_DMCN	A	Kelly G, Mobbs S, Pritkin JN, Mayston M, Mather M, Rosenbaum P, et al. Gross Motor Function Measure-66 trajectories in children recovering after severe acquired brain injury. Developmental Medicine and Child Neurology. 2015;57(3):241-7.
Kent_2015_JRehMed	A	Kent P, Grotle M, Dunn KM, Albert HB, Lauridsen HH. Rasch analysis of the 23-item version of the Roland Morris Disability Questionnaire. Journal of Rehabilitation Medicine. 2015;47(4):356-64.
Kersten_2011_EBCAM	A	Kersten P, White PJ, Tennant A. Construct validity of the holistic complementary and alternative medicines questionnaire (HCAMQ)-An investigation using modern psychometric approaches. Evidence-based Complementary and Alternative Medicine. 2011;2011.
Kersten_2012_DisReh	A	Kersten P, White PJ, Tennant A. The consultation and relational empathy measure: An investigation of its scaling structure. Disability and Rehabilitation. 2012;34(6):503-9.
Khadka_2011_IOVS	A	Khadka J, Pesudovs K, McAlinden C, Vogel M, Kernt M, Hirneiss C. Reengineering the glaucoma Quality of Life-15 questionnaire with Rasch analysis. Investigative Ophthalmology and Visual Science. 2011;52(9):6971-7.
Khadka_2013_OptViSci	A	Khadka J, McAlinden C, Pesudovs K. Quality assessment of ophthalmic questionnaires: Review and recommendations. Optometry and Vision Science. 2013;90(8):720-44.
Khadka_2014_IOVS	A	Khadka J, Huang J, Mollazadegan K, Gao R, Chen H, Zhang S, et al. Translation, cultural adaptation, and rasch analysis of the visual function (VF-14) questionnaire. Investigative Ophthalmology and Visual Science. 2014;55(7):4413-20.
Khan_2014_IJMPsyRes	A	Khan A, Chien CW, Burton NW. A new look at the construct validity of the K6 using Rasch analysis. International Journal of Methods in Psychiatric Research. 2014;23(1):1-8.
KhanA_2013_JCE	A	Khan A, Chien CW, Brauer SG. Rasch-based scoring offered more precision in differentiating patient groups in measuring upper limb function. Journal of Clinical Epidemiology. 2013;66(6):681-7.
Kieffer_2011_AEResJou	A	Kieffer MJ. Converging trajectories: Reading growth in language minority learners and their classmates, kindergarten to grade 8. American Educational Research Journal. 2011;48(5):1187-225.
Kieffer_2012_APsycholin	A	Kieffer MJ, Lesaux NK. Development of morphological awareness and vocabulary knowledge in Spanish-speaking language minority learners: A parallel process latent growth curve model. Applied Psycholinguistics. 2012;33(1):23-54.
KimHe_2015_JAM	A	Kim H, Schmidt KM, Murrah WM, Cameron CE, Grissmer D. A Rasch analysis of the KeyMath-3 Diagnostic Assessment. Journal of Applied Measurement. 2015;16(4):365-78.
KimSe_2014_WaCJ_B	A	Kim S, Mazza J. Reliability, Validity, and Item Response of the Medical Outcomes Study Social Support Score Among Incarcerated Women. Women and Criminal Justice. 2014;24(1):1-21.
KingJ_2002_CHumBeh	A	King J, Bond T, Blandford S. An investigation of computer anxiety by gender and grade. Computers in Human Behavior. 2002;18(1):69-84.
Kirchberger_2014_PHM	A	Kirchberger I, Braitmayer K, Coenen M, Oberhauser C, Meisinger C. Feasibility and psychometric properties of the German 12-item WHO Disability Assessment Schedule (WHODAS 2.0) in a population-based sample of patients with myocardial infarction from the MONICA/KORA myocardial infarction registry. Population Health Metrics. 2014;12(1).
Kisala_2015_JSCM_A	A	Kisala PA, Tulsky DS, Kalpakjian CZ, Heinemann AW, Pohlig RT, Carle A, et al. Measuring anxiety after spinal cord injury: Development and psychometric characteristics of the SCI-QOL Anxiety item bank and linkage with GAD-7. Journal of Spinal Cord Medicine. 2015;38(3):315-25.
Kisala_2015_JSCM_B	A	Kisala PA, Tulsky DS, Pace N, Victorson D, Choi SW, Heinemann AW. Measuring stigma after spinal cord injury: Development and psychometric characteristics of the SCI-QOL Stigma item bank and short form. Journal of Spinal Cord Medicine. 2015;38(3):386-96.
Klassen_2015_HeaExp	A	Klassen AF, Cano SJ, Sinha R, Shahbaz A, Klaassen R, Dix D. Is the Give Youth a Voice questionnaire an appropriate measure of teen-centred care in paediatric oncology: A Rasch measurement theory analysis. Health Expectations. 2015;18(5):1686-97.
KlineTL_2005_JAM	A	Kline TL, Schmidt KM. Rasch analysis examining processing mechanisms of the object location memory test revised. Journal of Applied Measurement. 2005;6(4):382-95.
Knisely_2015_JAM	A	Knisely KA, Wind SA. Gendered language attitudes: Exploring language as a gendered construct using Rasch measurement theory. Journal of Applied Measurement. 2015;16(1):95-112.
KollerB_2011_Work	A	Koller B, Niedermann K, Klipstein A, Haugboelle J. The psychometric properties of the German version of the new Worker Role Interview (WRI-G 10.0) in people with musculoskeletal disorders. Work: Journal of Prevention, Assessment & Rehabilitation. 2011;40(4):401-10.
Konsztowicz_2011_IPsychoger	A	Konsztowicz S, Xie H, Higgins J, Mayo N, Koski L. Development of a method for quantifying cognitive ability in the elderly through adaptive test administration. International Psychogeriatrics. 2011;23(7):1116-23.
Koparan_2014_EJEduRes	A	Koparan T, Güven B. The Effect of Project Based Learning on the Statistical Literacy Levels of Student 8th Grade. European Journal of Educational Research. 2014;3(3):145-57.
Koparan_2015_IJMEST	A	Koparan T, Güven B. The effect of project-based learning on students’ statistical literacy levels for data representation. International Journal of Mathematical Education in Science and Technology. 2015;46(5):658-86.
Korpershoek_2015_JAM	A	Korpershoek H, Xu K, Mok MMC, McLnerney DM, van der Werf G. Testing the multidimensionality of the inventory of school motivation in a Dutch student sample. Journal of Applied Measurement. 2015;16(1):41-59.
Kortge_2013_BehCha	A	Kortge R, Meade T, Tennant A. Interpersonal and intrapersonal functions of deliberate self-harm (DSH): A psychometric examination of the inventory of statements about self-injury (ISAS) scale. Behaviour Change. 2013;30(1):24-5.
Kottorp_2003_AOTJ_A	A	Kottorp A, Bernspång B, Fisher AG. Activities of daily living in persons with intellectual disability: Strengths and limitations in specific motor and process skills. Australian Occupational Therapy Journal. 2003;50(4):195-204.
Kottorp_2003_JIDisRes_B	A	Kottorp A, Bernspång B, Fisher AG. Validity of a performance assessment of activities of daily living for people with developmental disabilities. Journal of Intellectual Disability Research. 2003;47(8):597-605.
Kottorp_2013_BJOccThe	A	Kottorp A, Heuchemer B, Lie IP, Gumpert CH. Evaluation of activities of daily living ability and awareness among clients in a forensic psychiatry evaluation unit in Sweden. British Journal of Occupational Therapy. 2013;76(1):23-30.
Kowalski_2012_QoLR	A	Kowalski JW, Rentz AM, Walt JG, Lloyd A, Lee J, Young TA, et al. Rasch analysis in the development of a simplified version of the national eye institute visual-function questionnaire-25 for utility estimation. Quality of Life Research. 2012;21(2):323-34.
Krageloh_2013_QoLR	A	Krägeloh CU, Kersten P, Rex Billington D, Hsu PHC, Shepherd D, Landon J, et al. Validation of the WHOQOL-BREF quality of life questionnaire for general use in New Zealand: Confirmatory factor analysis and Rasch analysis. Quality of Life Research. 2013;22(6):1451-7.
Krpata_2012_JACSur	A	Krpata DM, Schmotzer BJ, Flocke S, Jin J, Blatnik JA, Ermlich B, et al. Design and initial implementation of HerQLes: A hernia-related quality-of-life survey to assess abdominal wall function. Journal of the American College of Surgeons. 2012;215(5):635-42.
KrumlindeSundholm_2003_SJOT	A	Krumlinde-Sundholm L, Eliasson AC. Development of the assisting hand assessment: A Rasch-built measure intended for children with unilateral upper limb impairments. Scandinavian Journal of Occupational Therapy. 2003;10(1):16-26.
KrumlindeSundholm_2012_DMCN	A	Krumlinde-Sundholm L. Reporting outcomes of the Assisting Hand Assessment: What scale should be used? Developmental Medicine & Child Neurology. 2012;54(9):807-8.
Kucukdeveci_2013_DisReh	A	Küçükdeveci AA, Kutlay Ş, Yildizlar D, Öztuna D, Elhan AH, Tennant A. The reliability and validity of the World Health Organization Disability Assessment Schedule (WHODAS-II) in stroke. Disability and Rehabilitation. 2013;35(5):214-20.
Kuo_2015_IJSE	A	Kuo CY, Wu HK, Jen TH, Hsu YS. Development and Validation of a Multimedia-based Assessment of Scientific Inquiry Abilities. International Journal of Science Education. 2015;37(14):2326-57.
Kurtais_2011_BMCMusDis	A	Kurtaiş Y, Öztuna D, Küçükdeveci AA, Kutlay Ş, Hafiz M, Tennant A. Reliability, construct validity and measurement potential of the ICF comprehensive core set for osteoarthritis. BMC Musculoskeletal Disorders. 2011;12.
Kurtais_2013_JMusPai	A	Kurtaiş Y, Oztuna D, Genç A, Kutlay Ş, Tennant A, Küçükdeveci AA. Reliability, construct validity and measurement potential of the international classification of functioning, disability and health comprehensive core set for chronic widespread pain. Journal of Musculoskeletal Pain. 2013;21(3):231-43.
Kutlay_2011_CliReh_A	A	Kutlay Ş, Küçükdeveci AA, Yanik B, Elhan A, Öztuna D, Tennant A. The interval scaling properties of the London Handicap Scale: An example from the adaptation of the scale for use in Turkey. Clinical Rehabilitation. 2011;25(3):248-56.
Kutlay_2011_RheInt_B	A	Kutlay Ş, Küçükdeveci AA, Elhan AH, Öztuna D, Koç N, Tennant A. Validation of the World Health Organization disability assessment schedule II (WHODAS-II) in patients with osteoarthritis. Rheumatology International. 2011;31(3):339-46.
Kyriakides_2014_SESImp	A	Kyriakides L, Creemers BPM, Muijs D, Rekers-Mombarg L, Papastylianou D, Van Petegem P, et al. Using the dynamic model of educational effectiveness to design strategies and actions to face bullying. School Effectiveness and School Improvement. 2014;25(1):83-104.
Lai_2014_JPaiSyMan	A	Lai JS, Cella D, Yanez B, Stone A. Linking fatigue measures on a common reporting metric. Journal of Pain and Symptom Management. 2014;48(4):639-48.
Lajeunesse_2002_PRSBBS	A	Lajeunesse MJ, Forbes MR. Host range and local parasite adaptation. Proceedings of the Royal Society B: Biological Sciences. 2002;269(1492):703-10.
Lamb_2014_JSEduTec	A	Lamb RL, Vallett D, Annetta L. Development of a short-form measure of science and technology self-efficacy using Rasch analysis. Journal of Science Education and Technology. 2014;23(5):641-57.
LambertMC_2013_CYCarFor	A	Lambert MC, Hurley KD, Michele Athay Tomlinson M, Stevens AL. Measurement Properties of the Motivation for Youth Treatment Scale with a Residential Group Home Population. Child and Youth Care Forum. 2013;42(6):555-70.
LambertMC_2015_IMHJ	A	Lambert MC, Cress CJ, Epstein MH. Psychometrics of the preschool behavioral and emotional rating scale with children from early childhood special education settings. Infant Mental Health Journal. 2015;36(3):287-97.
LambertRG_2015_ECRQ	A	Lambert RG, Kim DH, Burts DC. The measurement properties of the Teaching Strategies GOLD® assessment system. Early Childhood Research Quarterly. 2015;33:49-63.
Lange_2002_JAlzDis_A	A	Lange R, Donathan CL, Hughesa LF. Assessing olfactory abilities with the University of Pennsylvania smell identification test: A Rasch scaling approach. Journal of Alzheimer's Disease. 2002;4(2):77-91.
Lange_2004_BJPsycho	A	Lange R, Greyson B, Houran J. A Rasch scaling validation of a 'core' near-death experience. British Journal of Psychology. 2004;95(2):161-77.
Lange_2005_DynPsy	A	Lange R, Jerabek I, Houran J. A proprietary online matchmaking system. Dynamical Psychology. 2005.
Lange_2015_AHSciEdu_A	A	Lange R, Verhulst SJ, Roberts NK, Dorsey JK. Rasch analysis of professional behavior in medical education. Advances in Health Sciences Education. 2015;20(5):1179-94.
Lange_2015_SexCul_C	A	Lange R, Houran J, Li S. Dyadic Relationship Values in Chinese Online Daters: Love American Style? Sexuality and Culture. 2015;19(1):190-215.
LaPorta_2011_JRehMed	A	La Porta F, Franceschini M, Caselli S, Cavallini P, Susassi S, Tennant A. Unified Balance Scale: An activity-based, bed to community, and Aetiology-in dependent measure of balance calibrated with Rasch analysis. Journal of Rehabilitation Medicine. 2011;43(5):435-44.
LaPorta_2012_APMR	A	La Porta F, Caselli S, Susassi S, Cavallini P, Tennant A, Franceschini M. Is the berg balance scale an internally valid and reliable measure of balance across different etiologies in neurorehabilitation? A revisited rasch analysis study. Archives of Physical Medicine and Rehabilitation. 2012;93(7):1209-16.
LaPorta_2013_APMR	A	La Porta F, Caselli S, Ianes AB, Cameli O, Lino M, Piperno R, et al. Can we scientifically and reliably measure the level of consciousness in vegetative and minimally conscious states? Rasch analysis of the coma recovery scale-revised. Archives of Physical Medicine and Rehabilitation. 2013;94(3).
LaPorta_2015_EJPRM	A	La Porta F, Giordano A, Caselli S, Foti C, Franchignoni F. Is the Berg Balance Scale an effective tool for the measurement of early postural control impairments in patients with Parkinson's disease? Evidence from Rasch analysis. European Journal of Physical and Rehabilitation Medicine. 2015;51(6):705-16.
Lapp_2011_GesThe	A	Lapp WM, Polcin DL, Korcha RA. A reciprocal effects model for achieving and maintaining sobriety. Gestalt Theory. 2011;33(1):9-26.
Larizza_2011_OptViSci	A	Larizza FM, Xie J, Fenwick E, Lamoureux EL, Elizabeth Keeffe J, Rees G. Impact of a low-vision self-management program on informal caregivers. Optometry and Vision Science. 2011;88(12):1486-95.
Larson_2005_JCliExpNeu	A	Larson EB, Kirschner K, Bode R, Heinemann A, Goodman R. Construct and predictive validity of the repeatable battery for the assessment of neuropsychological status in the evaluation of stroke patients. Journal of Clinical and Experimental Neuropsychology. 2005;27(1):16-32.
Latham_2015_PLOSONE_B	A	Latham K, Baranian M, Timmis M, Pardhan S. Emotional health of people with visual impairment caused by retinitis pigmentosa. PLoS ONE. 2015;10(12).
Latimer_2012_PsychiRes	A	Latimer S, Covic T, Tennant A. Co-calibration of deliberate self harm (DSH) behaviours: Towards a common measurement metric. Psychiatry Research. 2012;200(1):26-34.
Latimer_2013_BMCPsych	A	Latimer S, Meade T, Tennant A. Measuring engagement in deliberate self-harm behaviours: Psychometric evaluation of six scales. BMC Psychiatry. 2013;13.
Latimer_2014_PsychiRes	A	Latimer S, Meade T, Tennant A. Development of item bank to measure deliberate self-harm behaviours: Facilitating tailored scales and computer adaptive testing for specific research and clinical purposes. Psychiatry Research. 2014;217(3):240-7.
LawtonG_2004_Rheu	A	Lawton G, Bhakta BB, Chamberlain MA, Tennant A. The Behçet's disease activity index. Rheumatology. 2004;43(1):73-8.
LeeHS_2011_JRST	A	Lee HS, Liu OL, Price CA, Kendall ALM. College students' temporal-magnitude recognition ability associated with durations of scientific changes. Journal of Research in Science Teaching. 2011;48(3):317-35.
LeeHS_2014_JRST	A	Lee HS, Liu OL, Pallant A, Roohr KC, Pryputniewicz S, Buck ZE. Assessment of uncertainty-infused scientific argumentation. Journal of Research in Science Teaching. 2014;51(5):581-605.
LeeM_2014_DisHeaJ	A	Lee M, Zhu W, Ackley-Holbrook E, Brower DG, McMurray B. Calibration and validation of the Physical Activity Barrier Scale for persons who are blind or visually impaired. Disability and Health Journal. 2014;7(3):309-17.
LeeNP_2005_JAM	A	Lee NP, Fisher Jr WP. Evaluation of the diabetes self-care scale. Journal of Applied Measurement. 2005;6(4):366-81.
LeeTW_2013_RNurHea	A	Lee TW, Kang SJ. Development of the short form of the Korean health literacy scale for the elderly. Research in Nursing and Health. 2013;36(5):524-34.
LeeYS_2012_MECD	A	Lee YS, Krishnan A, Park YS. Psychometric properties of the children's depression inventory: An item response theory analysis across age in a nonclinical, longitudinal, adolescent sample. Measurement and Evaluation in Counseling and Development. 2012;45(2):84-100.
Leong_2013_EduPsy	A	Leong S, Qiu XL. Designing a 'creativity and assessment scale' for arts education. Educational Psychology. 2013;33(5):596-615.
Lequerica_2012_JHTraReh	A	Lequerica A, Bushnik T, Wright J, Kolakowsky-Hayner SA, Hammond FM, Dijkers MP, et al. Psychometric properties of the multidimensional assessment of fatigue scale in traumatic brain injury: An NIDRR traumatic brain injury model systems study. Journal of Head Trauma Rehabilitation. 2012;27(6).
Lerdal_2011_IJNurStu_A	A	Lerdal A, Kottorp A. Psychometric properties of the Fatigue Severity Scale-Rasch analyses of individual responses in a Norwegian stroke cohort. International Journal of Nursing Studies. 2011;48(10):1258-65.
Lerdal_2011_QoLR_B	A	Lerdal A, Kottorp A, Gay C, Aouizerat BE, Portillo CJ, Lee KA. A 7-item version of the fatigue severity scale has better psychometric properties among HIV-infected adults: An application of a Rasch model. Quality of Life Research. 2011;20(9):1447-56.
Lerdal_2013_PsychiRes_B	A	Lerdal A, Kottorp A, Gay CL, Lee KA. Lee Fatigue and Energy Scales: Exploring aspects of validity in a sample of women with HIV using an application of a Rasch model. Psychiatry Research. 2013;205(3):241-6.
Leske_2012_IOVS	A	Leske DA, Hatt SR, Liebermann L, Holmes JM. Evaluation of the adult strabismus-20 (AS-20) questionnaire using Rasch analysis. Investigative Ophthalmology and Visual Science. 2012;53(6):2630-9.
LeungC_2011_IJDHumDev_A	A	Leung C, Lo SK. The development and validation of a checklist for early identification of students with learning difficulties. International Journal on Disability and Human Development. 2011;10(3):217-25.
LeungCB_2011_AEResJou_A	A	Leung CB, Silverman R, Nandakumar R, Qian X, Hines S. A comparison of difficulty levels of vocabulary in first grade basal readers for preschool dual language learners and monolingual english learners. American Educational Research Journal. 2011;48(2):421-61.
LeungYY_2014_JRheu	A	Leung YY, Png ME, Conaghan P, Tennant A. A systematic literature review on the application of rasch analysis in musculoskeletal disease - A special interest group report of OMERACT 11. Journal of Rheumatology. 2014;41(1):159-64.
Liao_2004_PPThe	A	Liao PJM, Campbell SK. Examination of the Item Structure of the Alberta Infant Motor Scale. Pediatric Physical Therapy. 2004;16(1):31-8.
Lick_2011_JAM	A	Lick DJ, Schmidt KM, Patterson CJ. The rainbow families scale (RFS): A measure of experiences among individuals with lesbian and gay parents. Journal of Applied Measurement. 2011;12(3):222-41.
Lieflander_2015_IJSE	A	Liefländer AK, Bogner FX, Kibbe A, Kaiser FG. Evaluating Environmental Knowledge Dimension Convergence to Assess Educational Programme Effectiveness. International Journal of Science Education. 2015;37(4):684-702.
LiEY_2014_BDB	A	Li EY, Commons ML, Mille JG, Robbinet TL, Marchand H, Ost CM, et al. Relationship among measures within the social and moral development domain. Behavioral Development Bulletin. 2014;19(3):106-13.
LiJ_2011_BMCPH	A	Li J, Liu H, Feng T, Cai Y. Psychometric assessment of HIV/STI sexual risk scale among MSM: A Rasch model approach. BMC Public Health. 2011;11.
Lillo_2012_ALScl	A	Lillo P, Savage S, Mioshi E, Kiernan MC, Hodges JR. Amyotrophic lateral sclerosis and frontotemporal dementia: A behavioural and cognitive continuum. Amyotrophic Lateral Sclerosis. 2012;13(1):102-9.
LimGS_2011_LanTes	A	Lim GS. The development and maintenance of rating quality in performance writing assessment: A longitudinal study of new and experienced raters. Language Testing. 2011;28(4):543-60.
Lindner_2014_JRRD	A	Lindner HYN, Langius-Eklöf A, Hermansson LMN. Test-retest reliability and rater agreements of assessment of capacity for myoelectric control version 2.0. Journal of Rehabilitation Research and Development. 2014;51(4):635-44.
LinKC_2012_JRehMed	A	Lin KC, Chen HF, Wu CY, Yu TY, Ouyang P. Multi dimensional rasch validation of the frenchay activities index in stroke patients receiving rehabilitation. Journal of Rehabilitation Medicine. 2012;44(1):58-64.
LinYH_2012_RDevDis	A	Lin YH, Su CY, Guo WY, Wuang YP. Psychometric validation and normative data of a second Chinese version of the Hooper Visual Organization Test in children. Research in Developmental Disabilities. 2012;33(6):1919-27.
LiuHHT_2015_SAGEopen	A	Liu HHT, Lee YS. Measuring Self-Regulation in Second Language Learning: A Rasch Analysis. SAGE Open. 2015;5(3).
LiuOL_2015_IJSE	A	Liu OL, Ryoo K, Linn MC, Sato E, Svihla V. Measuring Knowledge Integration Learning of Energy Topics: A two-year longitudinal study. International Journal of Science Education. 2015;37(7):1044-66.
LiuX_2005_JRST_B	A	Liu X, McKeough A. Developmental growth in students' concept of energy: Analysis of selected items from the TIMSS database. Journal of Research in Science Teaching. 2005;42(5):493-517.
LoC_2015_HQoLO	A	Lo C, Liang WM, Hang LW, Wu TC, Chang YJ, Chang CH. A psychometric assessment of the St. George's respiratory questionnaire in patients with COPD using rasch model analysis. Health and Quality of Life Outcomes. 2015;13(1).
Long_2011_EduResEva	A	Long C, Wendt H, Dunne T. Applying Rasch measurement in mathematics education research: Steps towards a triangulated investigation into proficiency in the multiplicative conceptual field. Educational Research and Evaluation. 2011;17(5):387-407.
Looney_2003_JAM	A	Looney MA, Rimmer JH. Aerobic Exercise Equipment Preferences among Older Adults: A Preliminary Investigation. Journal of Applied Measurement. 2003;4(1):43-58.
Looney_2004_JAM	A	Looney MA. Evaluating Judge Performance in Sport. Journal of Applied Measurement. 2004;5(1):31-47.
Lopes_2014_AddBeh	A	Lopes P, Prieto G, Delgado AR. A Rasch analysis of the harm reduction self-efficacy questionnaire in Portugal. Addictive Behaviors. 2014;39(10):1500-3.
Lopes_2015_ANP	A	Lopes RA, Dias RC, De Queiroz BZ, De Britto Rosa NM, Pereira LSM, Dias JMD, et al. Psychometric properties of the Brazilian version of the pain catastrophizing scale for acute low back pain. Arquivos de Neuro-Psiquiatria. 2015;73(5):436-44.
Loubser_2015_HSAGes	A	Loubser HJ, Casteleijn D, Bruce JC. The BETA® nursing measure: Calibrating construct validity with Rasch analyses. Health SA Gesondheid. 2015;20(1):22-32.
Lovaglio_2012_QoLR	A	Lovaglio PG, Monzani E. Health of the nation outcome scales evaluation in a community setting population. Quality of Life Research. 2012;21(9):1643-53.
Lozano_2015_SJP	A	Lozano OM, Rojas Tejada AJ, Foresti K, Zubaran C. A polytomous Rasch analysis of the English version of Health-Related Quality of Life for Drug Abusers Test. The Spanish Journal of Psychology. 2015;18.
LundgrenNilsson_2011_JRehMed	A	Lundgren-Nilsson AL, Tennant A. Past and present issues in Rasch analysis: The Functional Independence Measure (FIM™) revisited. Journal of Rehabilitation Medicine. 2011;43(10):884-91.
LundgrenNilsson_2012_BMCPH	A	Lundgren-Nilsson A, Jonsdottir IH, Pallant J, Ahlborg G. Internal construct validity of the Shirom-Melamed Burnout Questionnaire (SMBQ). BMC Public Health. 2012;12(1).
LundgrenNilsson_2013_HQoLO	A	Lundgren-Nilsson A, Jonsdottir IH, Ahlborg G, Jr., Tennant A. Construct validity of the Psychological General Well Being Index (PGWBI) in a sample of patients undergoing treatment for stress-related exhaustion: a Rasch analysis. Health Qual Life Outcomes. 2013;11:2. Epub 2013/01/09.
LundgrenNilsson_2014_ViH	A	Lundgren-Nilsson Å, Dencker A, Jakobsson S, Taft C, Tennant A. Construct validity of the Swedish version of the revised piper fatigue scale in an oncology sample - A rasch analysis. Value in Health. 2014;17(4):360-3.
Lundstrom_2014_JSCM	A	Lundström U, Lilja M, Petersson I, Lexell J, Isaksson G. Leisure repertoire among persons with a spinal cord injury: Interests, performance, and well-being. Journal of Spinal Cord Medicine. 2014;37(2):186-92.
Lust_2013_CHumBeh	A	Lust G, Elen J, Clarebout G. Students' tool-use within a web enhanced course: Explanatory mechanisms of students' tool-use pattern. Computers in Human Behavior. 2013;29(5):2013-21.
LuYM_2013_HQoLO	A	Lu YM, Wu YY, Hsieh CL, Lin CL, Hwang SL, Cheng KI, et al. Measurement precision of the disability for back pain scale-by applying Rasch analysis. Health and Quality of Life Outcomes. 2013;11(1).
Ma_2014_JMIR	A	Ma SC, Chien TW, Wang HH, Li YC, Yui MS. Applying computerized adaptive testing to the negative acts questionnaire-revised: Rasch analysis of workplace bullying. Journal of Medical Internet Research. 2014;16(2).
Magistrale_2015_MulSclJ	A	Magistrale G, Pisani V, Argento O, Incerti CC, Bozzali M, Cadavid D, et al. Validation of the world health organization disability assessment schedule II (WHODAS-II) in patients with multiple sclerosis. Multiple Sclerosis Journal. 2015;21(4):448-56.
Maimon_2012_BJCri	A	Maimon D, Browning CR. Adolescents' violent victimization in the neighbourhood: Situational and contextual determinants. British Journal of Criminology. 2012;52(4):808-33.
Maitra_2015_WorDev	A	Maitra C, Rao DSP. Poverty-Food Security Nexus: Evidence from a Survey of Urban Slum Dwellers in Kolkata. World Development. 2015;72:308-25.
Makransky_2014_Assessm_A	A	Makransky G, Bilenberg N. Psychometric Properties of the Parent and Teacher ADHD Rating Scale (ADHD-RS): Measurement Invariance Across Gender, Age, and Informant. Assessment. 2014;21(6):694-705.
Makransky_2014_QoLR_B	A	Makransky G, Schnohr CW, Torsheim T, Currie C. Equating the HBSC Family Affluence Scale across survey years: a method to account for item parameter drift using the Rasch model. Quality of Life Research. 2014;23(10):2899-907.
Makransky_2015_JCarAss	A	Makransky G, Rogers ME, Creed PA. Analysis of the Construct Validity and Measurement Invariance of the Career Decision Self-Efficacy Scale: A Rasch Model Approach. Journal of Career Assessment. 2015;23(4):645-60.
Malec_2004_APMR	A	Malec JF. The Mayo-Portland Participation Index: A brief and psychometrically sound measure of brain injury outcome. Archives of Physical Medicine and Rehabilitation. 2004;85(12):1989-96.
Malec_2012_APMR	A	Malec JF, Kean J, Altman IM, Swick S. Mayo-portland adaptability inventory: Comparing psychometrics in cerebrovascular accident to traumatic brain injury. Archives of Physical Medicine and Rehabilitation. 2012;93(12):2271-5.
Malinowsky_2011_SJOT	A	Malinowsky C, Nygård L, Kottorp A. Psychometric evaluation of a new assessment of the ability to manage technology in everyday life. Scandinavian Journal of Occupational Therapy. 2011;18(1):26-35.
Malinowsky_2012_IPsychoger	A	Malinowsky C, Almkvist O, Nygård L, Kottorp A. Individual variability and environmental characteristics influence older adults' abilities to manage everyday technology. International Psychogeriatrics. 2012;24(3):484-95.
Malinowsky_2013_TecDis	A	Malinowsky C, Kottorp A, Nygård L. Everyday technologies' levels of difficulty when used by older adults with and without cognitive impairment-Comparison of self-perceived versus observed difficulty estimates. Technology and Disability. 2013;25(3):167-76.
Malinowsky_2014_SJOT_B	A	Malinowsky C, Lund ML. The association between perceived and observed ability to use everyday technology in people of working age with ABI. Scandinavian Journal of Occupational Therapy. 2014;21(6):465-72.
Malinowsky_2015_HKJOT	A	Malinowsky C, Kottorp A, Tanemura R, Asaba E, Nagao T, Noda K, et al. Validation of the Everyday Technology Use Questionnaire in a Japanese context. Hong Kong Journal of Occupational Therapy. 2015;26:1-8.
Mallinckrodt_2014_JCouPsy	A	Mallinckrodt B, Miles JR, Bhaskar T, Chery N, Choi G, Sung MR. Developing a comprehensive scale to assess college multicultural programming. Journal of Counseling Psychology. 2014;61(1):133-45.
Mallinson_2011_APMR	A	Mallinson TR, Bateman J, Tseng HY, Manheim L, Almagor O, Deutsch A, et al. A comparison of discharge functional status after rehabilitation in skilled nursing, home health, and medical rehabilitation settings for patients after lower-extremity joint replacement surgery. Archives of Physical Medicine and Rehabilitation. 2011;92(5):712-20.
Mallinson_2014_APMR	A	Mallinson T, Deutsch A, Bateman J, Tseng HY, Manheim L, Almagor O, et al. Comparison of discharge functional status after rehabilitation in skilled nursing, home health, and medical rehabilitation settings for patients after hip fracture repair. Archives of Physical Medicine and Rehabilitation. 2014;95(2):209-17.
Mannarini_2013_TPM_C	A	Mannarini S, Boffo M, Balottin L. Beliefs about the patient's role in the psychotherapeutic relationship: A latent trait perspective. TPM - Testing, Psychometrics, Methodology in Applied Psychology. 2013;20(3):277-94.
Mannarini_2014_PLOSONE_A	A	Mannarini S, Boffo M. An implicit measure of associations with mental illness versus physical illness: Response latency decomposition and stimuli differential functioning in relation to IAT order of associative conditions and accuracy. PLoS ONE. 2014;9(7).
Marino_2004_APMR	A	Marino RJ, Graves DE. Metric properties of the ASIA motor score: Subscales improve correlation with functional activities. Archives of Physical Medicine and Rehabilitation. 2004;85(11):1804-10.
Markward_2004_JAM_A	A	Markward NJ, Fisher Jr WP. Calibrating the Genome. Journal of Applied Measurement. 2004;5(2):129-41.
MartinM_2004_JCE	A	Martin M, Blaisdell B, Kwong JW, Bjorner JB. The Short-Form Headache Impact Test (HIT-6) was psychometrically equivalent in nine languages. Journal of Clinical Epidemiology. 2004;57(12):1271-8.
Maslak_2005_JAM	A	Maslak AA, Karabatsos G, Anisimova TS, Osipov SA. Measuring and comparing higher education quality between countries worldwide. Journal of Applied Measurement. 2005;6(4):432-42.
Massof_2001_SurOph_A	A	Massof RW, Rubin GS. Visual function assessment questionnaires. Survey of Ophthalmology. 2001;45(6):531-48.
Massof_2005_APMR_A	A	Massof RW, Hsu CT, Baker FH, Barnett GD, Park WL, Deremeik JT, et al. Visual disability variables. I: The importance and difficulty of activity goals for a sample of low-vision patients. Archives of Physical Medicine and Rehabilitation. 2005;86(5):946-53.
Massof_2005_APMR_B	A	Massof RW, Hsu CT, Baker FH, Barnett GD, Park WL, Deremeik JT, et al. Visual disability variables. II: The difficulty of tasks for a sample of low-vision patients. Archives of Physical Medicine and Rehabilitation. 2005;86(5):954-67.
Matsuda_2015_PT	A	Matsuda PN, Taylor C, Shumway-Cook A. Examining the relationship between medical diagnoses and patterns of performance on the modified dynamic gait index. Physical Therapy. 2015;95(6):854-63.
Matthews_2012_JRMatEdu	A	Matthews P, Rittle-Johnson B, McEldoon K, Taylor R. Measure for measure: What combining diverse measures reveals about children's understanding of the equal sign as an indicator of mathematical equality. Journal for Research in Mathematics Education. 2012;43(3):316-50.
Mavranezouli_2013_MDecMak	A	Mavranezouli I, Brazier JE, Rowen D, Barkham M. Estimating a preference-based index from the clinical outcomes in routine evaluation-outcome measure (CORE-OM): Valuation of CORE-6D. Medical Decision Making. 2013;33(3):381-95.
McAllister_2013_JAM	A	McAllister S, Lincoln M, Ferguson A, McAllister L. Validating workplace performance assessments in health sciences students: A case study from speech pathology. Journal of Applied Measurement. 2013;14(4):356-74.
McCarthy_2014_JEmpCou	A	McCarthy CJ, Lambert RG, Reiser J. Vocational concerns of elementary teachers: Stress, job satisfaction, and occupational commitment. Journal of Employment Counseling. 2014;51(2):59-74.
McCreary_2013_NurRes	A	McCreary LL, Conrad KM, Conrad KJ, Scott CK, Funk RR, Dennis ML. Using the rasch measurement model in psychometric analysis of the family effectiveness measure. Nursing Research. 2013;62(3):149-59.
McCutcheon_2002_BJPsycho	A	McCutcheon LE, Lange R, Houran J. Conceptualization and measurement of celebrity worship. British Journal of Psychology. 2002;93(1):67-87.
McDonald_2015_Anthroz	A	McDonald SE, Vidacovich C, Ascione FR, Williams JH, Green KE. The children's treatment of animals questionnaire: A rasch analysis. Anthrozoos. 2015;28(1):131-44.
McHorney_2002_APMR	A	McHorney CA. Use of item response theory to link 3 modules of functional status items from the asset and health dynamics among the oldest old study. Archives of Physical Medicine and Rehabilitation. 2002;83(3):383-94.
McWayne_2015_IJSEduPsy	A	McWayne CM, Manz PH, Ginsburg-Block MD. Examination of the Family Involvement Questionnaire-Early Childhood (FIQ-EC) with low-income, Latino families of young children. International Journal of School & Educational Psychology. 2015;3(2):117-34.
Medeiros_2015_Ophtalmo	A	Medeiros FA, Gracitelli CPB, Boer ER, Weinreb RN, Zangwill LM, Rosen PN. Longitudinal changes in quality of life and rates of progressive visual field loss in glaucoma patients. Ophthalmology. 2015;122(2):293-301.
MedinaMirapeix_2014_APMR	A	Medina-Mirapeix F, Gacto-Sánchez M, Navarro-Pujalte E, Montilla-Herrador J, Lillo-Navarro C, Escolar-Reina P. Development and initial psychometric evaluation of the mobility activities measure for inpatient rehabilitation settings (Mobam-in). Archives of Physical Medicine and Rehabilitation. 2014;95(12):2367-75.
Mendoza_2014_Appetite	A	Mendoza JE, Schram GA, Arcand J, Henson S, L'Abbe M. Assessment of consumers' level of engagement in following recommendations for lowering sodium intake. Appetite. 2014;73:51-7.
Merkies_2015_NeuLet	A	Merkies ISJ, Faber CG, Lauria G. Advances in diagnostics and outcome measures in peripheral neuropathies. Neuroscience Letters. 2015;596:3-13.
Meroni_2015_JBMR	A	Meroni R, Piscitelli D, Bonetti F, Zambaldi M, Cerri CG, Guccione AA, et al. Rasch Analysis of the Italian version of Pain Catastrophizing Scale (PCS-I). Journal of Back and Musculoskeletal Rehabilitation. 2015;28(4):661-73.
Merrell_2005_JAM	A	Merrell C, Tymms P. Rasch analysis of inattentive, hyperactive and impulsive behaviour in young children and the link with academic achievement. Journal of Applied Measurement. 2005;6(1):1-18.
MiguelJP_2013_JVocBeh	A	Miguel JP, Silva JT, Prieto G. Career Decision Self-Efficacy Scale - Short Form: A Rasch analysis of the Portuguese version. Journal of Vocational Behavior. 2013;82(2):116-23.
MillerA_2011_DisReh	A	Miller A, Clemson L, Lannin N. Measurement properties of a modified Reintegration to Normal Living Index in a community-dwelling adult rehabilitation population. Disability and Rehabilitation. 2011;33(21-22):1968-78.
MillerNV_2013_IJMPsyRes	A	Miller NV, Currie SR, Hodgins DC, Casey D. Validation of the problem gambling severity index using confirmatory factor analysis and rasch modelling. International Journal of Methods in Psychiatric Research. 2013;22(3):245-55.
Mills_2012_HQoLO	A	Mills RJ, Pallant JF, Koufali M, Sharma A, Day S, Tennant A, et al. Validation of the Neurological Fatigue Index for stroke (NFI-Stroke). Health and Quality of Life Outcomes. 2012;10.
Mioshi_2014_ALSFD	A	Mioshi E, Hsieh S, Caga J, Ramsey E, Chen K, Lillo P, et al. A novel tool to detect behavioural symptoms in ALS. Amyotrophic Lateral Sclerosis and Frontotemporal Degeneration. 2014;15(3-4):298-304.
Mitchell_2012_JINeuSoc	A	Mitchell MB, Shaughnessy LW, Shirk SD, Yang FM, Atri A. Neuropsychological test performance and cognitive reserve in healthy aging and the Alzheimer's disease spectrum: A theoretically driven factor analysis. Journal of the International Neuropsychological Society. 2012;18(6):1071-80.
Mofreh_2014_IEduStu	A	Mofreh SAM, Ghafar MNA, Hj Omar AH, Mosaku M, Ma'ruf A. Psychometric properties on lecturers' beliefs on teaching function: Rasch model analysis. International Education Studies. 2014;7(11):47-55.
Mogias_2015_JEnvEdu	A	Mogias A, Boubonari T, Markos A, Kevrekidis T. Greek pre-service teachers knowledge of ocean sciences issues and attitudes toward ocean stewardship. Journal of Environmental Education. 2015;46(4):251-70.
Mok_2011_ECDCar	A	Mok MMC, Lam HMY. Assessment of language development of preschoolers: Validating morrow's checklist for assessing early literacy development. Early Child Development and Care. 2011;181(2):203-20.
Mok_2014_APEduRes	A	Mok MMC, Wang WC, Cheng YY, Leung SO, Chen LM. Prevalence and Behavioral Ranking of Bullying and Victimization Among Secondary Students in Hong Kong, Taiwan, and Macao. Asia-Pacific Education Researcher. 2014;23(3):757-67.
Mokros_2011_IJLawPsy	A	Mokros A, Neumann CS, Stadtland C, Osterheider M, Nedopil N, Hare RD. Assessing measurement invariance of PCL-R assessments from file reviews of North American and German offenders. International Journal of Law and Psychiatry. 2011;34(1):56-63.
Mollazadegan_2014_JCRefSur	A	Mollazadegan K, Huang J, Khadka J, Wang Q, Yang F, Gao R, et al. Cross-cultural validation of the National Eye Institute Visual Function Questionnaire. Journal of Cataract and Refractive Surgery. 2014;40(5):774-84.
Mollazadegan_2015_ActaOph	A	Mollazadegan K, Lundström M. A study of the correlation between patient-reported outcomes and clinical outcomes after cataract surgery in ophthalmic clinics. Acta Ophthalmologica. 2015;93(3):293-8.
MolnarBE_2003_ChiMal	A	Molnar BE, Buka SL, Brennen RT, Holton JK, Earls F. A Multilevel Study of Neighborhoods and Parent-to-Child Physical Aggression: Results from the Project on Human Development in Chicago Neighborhoods. Child Maltreatment. 2003;8(2):84-97.
MolnarG_2013_TSC	A	Molnár G, Greiff S, Csapó B. Inductive reasoning, domain specific and complex problem solving: Relations and development. Thinking Skills and Creativity. 2013;9:35-45.
Morin_2011_Sleep	A	Morin CM, Belleville G, Belanger L, Ivers H. The Insomnia Severity Index: Psychometric indicators to detect insomnia cases and evaluate treatment response. Sleep: Journal of Sleep and Sleep Disorders Research. 2011;34(5):601-8.
MullerR_2012_RehPsy	A	Müller R, Cieza A, Geyh S. Rasch analysis of the Hospital Anxiety and Depression Scale in spinal cord injury. Rehabilitation Psychology. 2012;57(3):214-23.
MurphyS_2014_PhysiCan	A	Murphy S, Dalton M, Dawes D. Assessing physical therapy students' performance during clinical practice. Physiotherapy Canada. 2014;66(2):169-76.
Murray_2014_JADevDis	A	Murray AL, Booth T, McKenzie K, Kuenssberg R, O'Donnell M. Are autistic traits measured equivalently in individuals with and without an autism spectrum disorder? an invariance analysis of the autism spectrum quotient short form. Journal of Autism and Developmental Disorders. 2014;44(1):55-64.
Mutalib_2015_JEngST	A	Mutalib AA, Ghafar HA, Baharom S, Hamzah N. Rasch model analysis of implementation effectiveness for final year research project course in civil & structural engineering department, UKM. Journal of Engineering Science and Technology. 2015;10(Spec. Issue 1 on UKM Teaching and Learning Congress 2013, June 2015):11-22.
Mutz_2013_ResEva	A	Mutz R, Bornmann L, Daniel HD. Types of research output profiles: A multilevel latent class analysis of the Austrian Science Fund's final project report data. Research Evaluation. 2013;22(2):118-33.
Myers_2004_GroDyn	A	Myers ND, Payment CA, Feltz DL. Reciprocal relationships between collective efficacy and team performance in women's ice hockey. Group Dynamics. 2004;8(3):182-95.
Myford_2001_JPEvaEdu	A	Myford CM, Engelhard Jr G. Examining the psychometric quality of the national board for professional teaching standards early childhood/generalist assessment system. Journal of Personnel Evaluation in Education. 2001;15(4):253-85.
Nam_2011_JCarDev	A	Nam SK, Yang E, Lee SM, Lee SH, Seol H. A psychometric evaluation of the career decision self-efficacy scale with Korean students: A Rasch model approach. Journal of Career Development. 2011;38(2):147-66.
Ndosi_2011_BMCMusDis	A	Ndosi M, Tennant A, Bergsten U, Kukkurainen ML, Machado P, De La Torre-Aboki J, et al. Cross-cultural validation of the Educational Needs Assessment Tool in RA in 7 European countries. BMC Musculoskeletal Disorders. 2011;12.
Nehring_2015_IJSE	A	Nehring A, Nowak KH, zu Belzen AU, Tiemann R. Predicting Students’ Skills in the Context of Scientific Inquiry with Cognitive, Motivational, and Sociodemographic Variables. International Journal of Science Education. 2015;37(9):1343-63.
NeumannI_2011_IJSE	A	Neumann I, Neumann K, Nehm R. Evaluating instrument quality in science education: Rasch-based analyses of a nature of science test. International Journal of Science Education. 2011;33(10):1373-405.
NeumannI_2015_PJE	A	Neumann I, Rösken-Winter B, Lehmann M, Duchhardt C, Heinze A, Nickolaus R. Measuring Mathematical Competences of Engineering Students at the Beginning of Their Studies. Peabody Journal of Education. 2015;90(4):465-76.
NeumannK_2013_JRST	A	Neumann K, Viering T, Boone WJ, Fischer HE. Towards a learning progression of energy. Journal of Research in Science Teaching. 2013;50(2):162-88.
Ngo_2013_Cornea	A	Ngo W, Situ P, Keir N, Korb D, Blackie C, Simpson T. Psychometric properties and validation of the standard patient evaluation of eye dryness questionnaire. Cornea. 2013;32(9):1204-10.
NgSSN_2012_MEResJou	A	Ng SSN. The Chinese number naming system and its impact on the arithmetic performance of pre-schoolers in Hong Kong. Mathematics Education Research Journal. 2012;24(2):189-213.
NguyenAM_2014_IOVS	A	Nguyen AM, van Landingham SW, Massof RW, Rubin GS, Ramulu PY. Reading ability and reading engagement in older adults with glaucoma. Investigative Ophthalmology and Visual Science. 2014;55(8):5284-90.
Nicolaidou_2011_PDevEdu_A	A	Nicolaidou M, Petridou A. Echoing school leaders' voices in Cyprus: A study of novice school leaders' perceptions regarding leadership professional development. Professional Development in Education. 2011;37(5):721-40.
Nicolaidou_2011_SESImp_B	A	Nicolaidoua M, Petridoua A. Evaluation of CPD programmes: Challenges and implications for leader and leadership development. School Effectiveness and School Improvement. 2011;22(1):51-85.
Nilsson_2011_SJOT	A	Nilsson I, Argentzell E, Sandlund M, Leufstadius C, Eklund M. Measuring perceived meaningfulness in day centres for persons with mental illness. Scandinavian Journal of Occupational Therapy. 2011;18(4):312-20.
Nishino_2012_MLanJou	A	Nishino T. Modeling Teacher Beliefs and Practices in Context: A Multimethods Approach. Modern Language Journal. 2012;96(3):380-99.
Nissen_2015_SEduEva	A	Nissen A, Ehmke T, Köller O, Duchhardt C. Comparing apples with oranges? An approach to link TIMSS and the National Educational Panel Study in Germany via equipercentile and IRT methods. Studies in Educational Evaluation. 2015;47:58-67.
Noerholm_2004_QoLR	A	Noerholm V, Groenvold M, Watt T, Bjorner JB, Rasmussen NA, Bech P. Quality of life in the Danish general population - Normative data and validity of WHOQOL-BREF using Rasch and item response theory models. Quality of Life Research. 2004;13(2):531-40.
Noltemeyer_2014_AssEffInt	A	Noltemeyer AL, Boone WJ, Sansosti FJ. Assessing school-level RTI implementation for reading: Development and piloting of the RTIS-R. Assessment for Effective Intervention. 2014;40(1):40-52.
Notoh_2013_HKJOT	A	Notoh H, Yamada T, Kobayashi N, Ishii Y, Forsyth K. Examining the psychometric properties of the model of human occupation screening tool-japanese version. Hong Kong Journal of Occupational Therapy. 2013;23(1):26-31.
Nott_2012_BJOccThe	A	Nott MT, Chapparo C. Exploring the validity of the perceive, recall, plan and perform system of task analysis: Cognitive strategy use in adults with brain injury. British Journal of Occupational Therapy. 2012;75(6):256-63.
Nugent_2003_RSWP	A	Nugent WR. A psychometric study of the Multi-Problem Screening Inventory depression subscale using item response and generalizability theories. Research on Social Work Practice. 2003;13(1):65-79.
Nye_2011_JAppPsy	A	Nye CD, Drasgow F. Effect Size Indices for Analyses of Measurement Equivalence: Understanding the Practical Importance of Differences Between Groups. Journal of Applied Psychology. 2011;96(5):966-80.
Nygard_2014_BJOccThe	A	Nygård L, Kottorp A. Engagement in instrumental activities of daily living, social activities, and use of everyday technology in older adults with and without cognitive impairment. British Journal of Occupational Therapy. 2014;77(11):565-73.
Nygren_2013_SJOT	A	Nygren U, Sandlund M, Bernspång B, Fisher AG. Exploring perceptions of occupational competence among participants in Individual Placement and Support (IPS). Scandinavian Journal of Occupational Therapy. 2013;20(6):429-37.
Ohman_2011_SJOT	A	Öhman A, Nygård L, Kottorp A. Occupational performance and awareness of disability in mild cognitive impairment or dementia. Scandinavian Journal of Occupational Therapy. 2011;18(2):133-42.
Okabayashi_2014_JCCGer	A	Okabayashi H. Development of a Japanese Version of the Selection, Optimization, and Compensation Questionnaire. Journal of Cross-Cultural Gerontology. 2014;29(4):447-65.
Olson_2012_IJMedInf	A	Olson JR, Belohlav JA, Cook LS. A Rasch model analysis of technology usage in Minnesota hospitals. International Journal of Medical Informatics. 2012;81(8):527-38.
ONeill_2005_JNurMea	A	O'Neill TR, Marks CM, Reynolds M. Re-evaluating the NCLEX-RN® passing standard. Journal of Nursing Measurement. 2005;13(2):147-65.
Oon_2011_IJSE	A	Oon PT, Subramaniam R. On the declining interest in physics among students-from the perspective of teachers. International Journal of Science Education. 2011;33(5):727-46.
Oon_2013_IJSE	A	Oon PT, Subramaniam R. Factors influencing Singapore students' choice of physics as a tertiary field of study: A Rasch analysis. International Journal of Science Education. 2013;35(1):86-118.
OrejaRodriguez_2012_JClePro	A	Oreja-Rodríguez JR, Armas-Cruz Y. Environmental performance in the hotel sector: The case of the Western Canary Islands. Journal of Cleaner Production. 2012;29-30:64-72.
OsmanA_2014_JPerAss	A	Osman A, Lamis DA, Freedenthal S, Gutierrez PM, McNaughton-Cassill M. The Multidimensional Scale of Perceived Social Support: Analyses of internal reliability, measurement invariance, and correlates across gender. Journal of Personality Assessment. 2014;96(1):103-12.
Ottonello_2012_MinMed	A	Ottonello M, Franchignoni F, Giordano A, Benevolo E. Patient satisfaction with hospital rehabilitation: Validation of the SAT-16 questionnaire through Rasch analysis. Minerva Medica. 2012;103(1):1-11.
OudeVoshaar_2014_PLOSONE	A	Oude Voshaar MA, ten Klooster PM, Glas CA, Vonkeman HE, Taal E, Krishnan E, et al. Calibration of the PROMIS physical function item bank in Dutch patients with rheumatoid arthritis. PLoS One. 2014;9(3):e92367. Epub 2014/03/19.
Owings_2013_SAGEopen	A	Owings LR, Thorpe GL, McMillan ES, Burrows RD, Sigmon ST, Alley DC. Scaling irrational beliefs in the General Attitude and Belief Scale: An analysis using item response theory methodology. SAGE Open. 2013;3(2):1-10.
Ozelie_2012_JSCM	A	Ozelie R, Gassaway J, Buchman E, Thimmaiah D, Heisler L, Cantoni K, et al. Relationship of occupational therapy inpatient rehabilitation interventions and patient characteristics to outcomes following spinal cord injury: The SCIRehab Project. Journal of Spinal Cord Medicine. 2012;35(6):527-46.
PaeEK_2001_AJODO	A	Pae EK, McKenna GA, Sheehan TJ, Garcia R, Kuhlberg A, Nanda R. Role of lateral cephalograms in assessing severity and difficulty of orthodontic cases. American Journal of Orthodontics and Dentofacial Orthopedics. 2001;120(3):254-62.
PaeHK_2012_EduResEva_A	A	Pae HK. A psychometric measurement model for adult English language learners: Pearson Test of English Academic. Educational Research and Evaluation. 2012;18(3):211-29.
PaeHK_2012_LAssQua_B	A	Pae HK, Greenberg D, Morris RD. Construct validity and measurement invariance of the peabody picture vocabulary test-III form a. Language Assessment Quarterly. 2012;9(2):152-71.
PaezK_2014_JHeaCom	A	Paez KA, Mallery CJ, Noel H, Pugliese C, McSorley VE, Lucado JL, et al. Development of the health insurance literacy measure (HILM): Conceptualizing and measuring consumer ability to choose and use private health insurance. Journal of Health Communication. 2014;19:225-39.
Pampaka_2012_BEResJ_A	A	Pampaka M, Williams J, Hutcheson G. Measuring students' transition into university and its association with learning outcomes. British Educational Research Journal. 2012;38(6):1041-71.
Pampaka_2012_BEResJ_B	A	Pampaka M, Williams J, Hutcheson G, Wake G, Black L, Davis P, et al. The association between mathematics pedagogy and learners' dispositions for university study. British Educational Research Journal. 2012;38(3):473-96.
Pampaka_2013_JAM	A	Pampaka M, Williams J, Hutcheson G, Black L, Davis P, Hernandez-Martinez P, et al. Measuring alternative learning outcomes: Dispositions to study in higher education. Journal of Applied Measurement. 2013;14(2):197-218.
Pampaka_2015_IJEdR	A	Pampaka M, Pepin B, Sikko SA. Supporting or alienating students during their transition to Higher Education: Mathematically relevant trajectories in the contexts of England and Norway. International Journal of Educational Research. 2015;79:240-57.
Panayides_2012_EJPsy	A	Panayides P, Walker MJ. Evaluation of the psychometric properties of the internet addiction test (IAT) in a sample of Cypriot high school students: The Rasch measurement perspective. Europe's Journal of Psychology. 2012;8(3):327-51.
Panayides_2013_EJPsy_C	A	Panayides P, Gavrielides M, Galatopoulos C, Gavriilidou M. Using Rasch measurement to create a quality of sleep scale for a non-clinical sample based on the Pittsburgh sleep quality index (PSQI). Europe's Journal of Psychology. 2013;9(1):113-35.
Pantziara_2012_EduStuMat	A	Pantziara M, Philippou G. Levels of students' "conception" of fractions. Educational Studies in Mathematics. 2012;79(1):61-83.
Papageorgiou_2012_LAssQua	A	Papageorgiou S, Stevens R, Goodwin S. The relative difficulty of dialogic and monologic input in a second-language listening comprehension test. Language Assessment Quarterly. 2012;9(4):375-97.
ParkJJ_2013_AEResJou	A	Park JJ, Denson N, Bowman NA. Does Socioeconomic Diversity Make a Difference? Examining the Effects of Racial and Socioeconomic Diversity on the Campus Climate for Diversity. American Educational Research Journal. 2013;50(3):466-96.
ParkSY_2011_JPTS	A	Park SY, Yi CH, Velozo CA. Development and validation of the Korean version of gross motor function measure. Journal of Physical Therapy Science. 2011;23(2):327-31.
Patomella_2004_SJOT	A	Patomella AH, Caneman G, Kottorp A, Tham K. Identifying scale and person response validity of a new assessment of driving ability. Scandinavian Journal of Occupational Therapy. 2004;11(2):70-7.
Patomella_2011_TecDis	A	Patomella AH, Kottorp A, Malinowsky C, Nygrd L. Factors that impact the level of difficulty of everyday technology in a sample of older adults with and without cognitive impairment. Technology and Disability. 2011;23(4):243-50.
Patomella_2015_AJOT	A	Patomella AH, Bundy A. P-Drive: Implementing an assessment of on-road driving in clinical settings and investigating its internal and predictive validity. American Journal of Occupational Therapy. 2015;69(4).
Pearton_2014_AOTJ	A	Pearton JL, Ramugondo E, Cloete L, Cordier R. Playfulness and prenatal alcohol exposure: A comparative study. Australian Occupational Therapy Journal. 2014;61(4):259-67.
Peeraer_2012_ComEdu	A	Peeraer J, Van Petegem P. Measuring integration of information and communication technology in education: An item response modeling approach. Computers and Education. 2012;58(4):1247-59.
Pentecost_2013_JCheEdu	A	Pentecost TC, Barbera J. Measuring learning gains in chemical education: A comparison of two methods. Journal of Chemical Education. 2013;90(7):839-45.
Peoples_2013_JAM	A	Peoples SM, O'Dwyer LM, Shields KA, Wang Y. With hiccups and bumps: The development of a Rasch-based instrument to measure elementary students' understanding of the Nature of Science. Journal of Applied Measurement. 2013;14(1):57-78.
Peoples_2014_JAM_A	A	Peoples SM, O'Dwyer LM. The Nature of Science Instrument-Elementary (NOSI-E): The end of the road? Journal of Applied Measurement. 2014;15(4):338-58.
Peoples_2014_LER_B	A	Peoples SM, O'Dwyer LM, Wang Y, Brown JJ, Rosca CV. Development and application of the Elementary School Science Classroom Environment Scale (ESSCES): Measuring student perceptions of constructivism within the science classroom. Learning Environments Research. 2014;17(1):49-73.
Peter_2014_JHeaPsy	A	Peter C, Cieza A, Geyh S. Rasch analysis of the General Self-Efficacy Scale in spinal cord injury. Journal of Health Psychology. 2014;19(4):544-55.
PhaswanaMafuya_2013_GHA	A	Phaswana-Mafuya N, Peltzer K, Chirinda W, Kose Z, Hoosain E, Ramlagan S, et al. Self-rated health and associated factors among older South Africans: Evidence from the study on global ageing and adult health. Global Health Action. 2013;6(1).
Phillipson_2012_APEduRev	A	Phillipson S, Phillipson SN. Children's cognitive ability and their academic achievement: The mediation effects of parental expectations. Asia Pacific Education Review. 2012;13(3):495-508.
Piquero_2001_JCriJus	A	Piquero AR, Macintosh R, Hickman M. Applying Rasch modeling to the validity of a control balance scale. Journal of Criminal Justice. 2001;29(6):493-505.
Piquero_2002_SMRes	A	Piquero AR, Macintosh R, Hickman M. The validity of a self-reported delinquency scale: Comparisons across gender, age, race, and place of residence. Sociological Methods and Research. 2002;30(4):492-529.
Pishghadam_2011_TIJEPA_B	A	Pishghadam R, Baghaei P, Ahmadi HS. Development and validation of an English language teacher competency test using item response theory. The International Journal of Educational and Psychological Assessment. 2011;8(2):54-68.
Pitkethly_2012_IJTMan	A	Pitkethly RH. Intellectual property awareness. International Journal of Technology Management. 2012;59(3-4):163-79.
Platz_2013_MusSci	A	Platz F, Kopiez R. When the first impression counts: Music performers, audience and the evaluation of stage entrance behaviour. Musicae Scientiae. 2013;17(2):167-97.
PriceCA_2013_JRST	A	Price CA, Lee HS. Changes in participants' scientific attitudes and epistemological beliefs during an astronomical citizen science project. Journal of Research in Science Teaching. 2013;50(7):773-801.
PrietoL_2001_JAM	A	Prieto L, Roset M, Badia X. Rasch measurement in the Assessment of Growth Hormone Deficiency in adult patients. Journal of Applied Measurement. 2001;2(1):48-64.
PrietoL_2003_ActaPsySca	A	Prieto L, Novick D, Sacristán JA, Edgell ET, Alonso J. A Rasch model analysis to test the cross-cultural validity of the EuroQoL-5D in the Schizophrenia Outpatient Health Outcomes Study. Acta Psychiatrica Scandinavica, Supplement. 2003;107(416):24-9.
PrietoL_2005_HQoLO	A	Prieto L, Thorsen H, Juul K. Development and validation of a quality of life questionnaire for patients with colostomy of ileostomy. Health and Quality of Life Outcomes. 2005;3.
Primi_2014_JPsyEdAss	A	Primi R, Wechsler SM, de Cassia Nakano T, Guzzo RSL. Using item response theory methods with the brazilian temperament scale for students. Journal of Psychoeducational Assessment. 2014;32(7):651-62.
Prodinger_2015_ArthCR	A	Prodinger B, Stamm T, Peterson D, Stucki G, Tennant A. Toward a Standardized Reporting of Outcomes in Hand Osteoarthritis: Developing a Common Metric of Outcome Measures Commonly Used to Assess Functioning. Arthritis Care and Research. 2015;68(8):1115-27.
PusicAL_2013_CPlaSur	A	Pusic AL, Klassen AF, Scott AM, Cano SJ. Development and Psychometric Evaluation of the FACE-Q Satisfaction with Appearance Scale. A New Patient-Reported Outcome Instrument for Facial Aesthetics Patients. Clinics in Plastic Surgery. 2013;40(2):249-60.
Putzke_2001_APMR	A	Putzke JD, Richards JS, DeVivo MJ. Quality of life after spinal cord injury caused by gunshot. Archives of Physical Medicine and Rehabilitation. 2001;82(7):949-54.
Putzke_2002_APMR_A	A	Putzke JD, Richards JS, Hicken BL, DeVivo MJ. Predictors of life satisfaction: A spinal cord injury cohort study. Archives of Physical Medicine and Rehabilitation. 2002;83(4):555-61.
Putzke_2002_APMR_B	A	Putzke JD, Hicken BL, Richards JS. Race: Predictor versus proxy variable? Outcomes after spinal cord injury. Archives of Physical Medicine and Rehabilitation. 2002;83(11):1603-11.
Putzke_2002_Pain_C	A	Putzke JD, Richards JS, Hicken BL, DeVivo MJ. Interference due to pain following spinal cord injury: Important predictors and impact on quality of life. Pain. 2002;100(3):231-42.
Putzke_2003_JSCM	A	Putzke JD, Barrett JJ, Richards JS, DeVivo MJ. Age and spinal cord injury: An emphasis on outcomes among the elderly. Journal of Spinal Cord Medicine. 2003;26(1):37-44.
Quail_2011_BMCGer_A	A	Quail JM, Wolfson C, Lippman A. Unmet need and psychological distress predict emergency department visits in community-dwelling elderly women: A prospective cohort study. BMC Geriatrics. 2011;11.
Quail_2011_CJAgi_B	A	Quail JM, Wolfson C, Lippman A. Unmet need for assistance to perform activities of daily living and psychological distress in community-dwelling elderly women. Canadian Journal on Aging. 2011;30(4):591-602.
Quinn_2014_HQoLO	A	Quinn H, Thissen D, Liu Y, Magnus B, Lai JS, Amtmann D, et al. Using item response theory to enrich and expand the PROMIS® pediatric self report banks. Health and Quality of Life Outcomes. 2014;12(1).
Quintao_2013_PsiRefCri	A	Quintão S, Delgado AR, Prieto G. Validity study of the beck anxiety inventory (Portuguese version) by the rasch rating scale model. Psicologia: Reflexao e Critica. 2013;26(2):305-10.
Ramakrisnan_2013_JSoftware	A	Ramakrisnan P, Jaafar A, Mohd Yatim NFB. Designing Online Discussion Site (ODS) user interface for emotional user experiences: A proposed kansei triangulation method. Journal of Software. 2013;8(12):3238-45.
Raudenbush_2003_SocMet	A	Raudenbush SW, Johnson C, Sampson RJ. A multivariate, multilevel Rasch model with application to self-reported criminal behavior. Sociological Methodology. 2003;33.
Ready_2013_EduPol	A	Ready DD. Associations Between Student Achievement and Student Learning: Implications for Value-Added School Accountability Models. Educational Policy. 2013;27(1):92-120.
Rees_2015_JHeaPsy	A	Rees G, Lamoureux EL, Xie J, Sturrock BA, Fenwick EK. Using Rasch analysis to evaluate the validity of the diabetes-specific version of the Illness Perception Questionnaire-Revised. Journal of Health Psychology. 2015;20(10):1340-56.
ReevesTC_2004_HCManRev	A	Reeves TC, Ford EW. Strategic management and performance differences: Nonprofit versus for-prof it health organizations. Health Care Management Review. 2004;29(4):298-308.
ReevesTD_2011_IHEdu	A	Reeves TD, Stich AE. Tackling Suboptimal Bachelor's Degree Completion Rates Through Training in Self-Regulated Learning (SRL). Innovative Higher Education. 2011;36(1):3-17.
Rese_2013_CInnMan	A	Rese A, Gemünden HG, Baier D. 'Too many cooks spoil the broth': Key persons and their roles in inter-organizational innovations. Creativity and Innovation Management. 2013;22(4):390-407.
Revesz_2012_LanLea	A	Révész A. Working Memory and the Observed Effectiveness of Recasts on Different L2 Outcome Measures. Language Learning. 2012;62(1):93-132.
Riazi_2014_JRehMed	A	Riazi A, Aspden T, Jones F. Stroke self-efifcacy questionnaire: A Rasch-refined measure of confidence post stroke. Journal of Rehabilitation Medicine. 2014;46(5):406-12.
Richmond_2015_JAM	A	Richmond J, Waugh RF, Konza D. Visually discriminating upper case letters, lower case letters and numbers. Journal of Applied Measurement. 2015;16(1):24-40.
Riley_2011_JMHPEco	A	Riley WT, Pilkonis P, Cella D. Application of the national institutes of health patient-reported outcome measurement information system (PROMIS) to mental health research. Journal of Mental Health Policy and Economics. 2011;14(4).
RittleJohnson_2011_JEduPsy	A	Rittle-Johnson B, Matthews PG, Taylor RS, McEldoon KL. Assessing Knowledge of Mathematical Equivalence: A Construct-Modeling Approach. Journal of Educational Psychology. 2011;103(1):85-104.
RittleJohnson_2013_JCogDev	A	Rittle-Johnson B, Fyfe ER, McLean LE, McEldoon KL. Emerging Understanding of Patterning in 4-Year-Olds. Journal of Cognition and Development. 2013;14(3):376-96.
Robinson_2011_AEResJou	A	Robinson JP, Lubienski ST. The development of gender achievement gaps in mathematics and reading during elementary and middle school: Examining direct cognitive assessments and teacher ratings. American Educational Research Journal. 2011;48(2):268-302.
Robnett_2015_JRST	A	Robnett RD, Chemers MM, Zurbriggen EL. Longitudinal associations among undergraduates' research experience, self-efficacy, and identity. Journal of Research in Science Teaching. 2015;52(6):847-67.
Rocha_2012_MDecMak	A	Rocha NS, Power MJ, Bushnell DM, Fleck MP. Cross-cultural evaluation of the WHOQOL-BREF domains in primary care depressed patients using Rasch analysis. Medical Decision Making. 2012;32(1):41-55.
Rojas_2015_HQoLO	A	Rojas AJ, Lozano O, Foresti K, Zolfaghari E, Zubaran C. Comparison and concordance of health-related quality of life tests among substance users. Health and Quality of Life Outcomes. 2015;13(1).
RojasTejada_2005_SIR	A	Rojas Tejada AJ, Lozano Rojas OM. Application of an IRT polytomous model for measuring health related quality of life. Social Indicators Research. 2005;74(2):369-94.
Roldan_2012_TIJEPA	A	Roldan AE, Magno C. Pre-licensure examination for teachers: An application of Rasch analysis. The International Journal of Educational and Psychological Assessment. 2012;11(2):138-53.
Romine_2015_IJSE	A	Romine WL, Schaffer DL, Barrow L. Development and Application of a Novel Rasch-based Methodology for Evaluating Multi-Tiered Assessment Instruments: Validation and utilization of an undergraduate diagnostic test of the water cycle. International Journal of Science Education. 2015;37(16):2740-68.
Rose_2014_DiaCliNeu_A	A	Rose M, Devine J. Assessment of patient-reported symptoms of anxiety. Dialogues in Clinical Neuroscience. 2014;16(2):197-211.
Rose_2014_JCE_B	A	Rose M, Bjorner JB, Gandek B, Bruce B, Fries JF, Ware Jr JE. The PROMIS Physical Function item bank was calibrated to a standardized metric and shown to improve measurement efficiency. Journal of Clinical Epidemiology. 2014;67(5):516-26.
Rothenfluh_2012_ESpiJ	A	Rothenfluh DA, Neubauer G, Klasen J, Min K. Analysis of internal construct validity of the SRS-24 questionnaire. European Spine Journal. 2012;21(8):1590-5.
Royal_2013_JNurMea	A	Royal KD, Thompson JM. A psychometric validation of the beliefs toward mental illness scale. Journal of Nursing Measurement. 2013;21(3):516-24.
Royal_2014_AnSciEdu	A	Royal KD, Gilliland KO, Kernick ET. Using Rasch measurement to score, evaluate, and improve examinations in an anatomy course. Anatomical Sciences Education. 2014;7(6):450-60.
Ruiz_2013_PDTRT	A	Ruiz MA, Pincus AL. A Rasch model analysis of NEO PI-R fearless dominance and impulsive antisociality scales. Personality Disorders: Theory, Research, and Treatment. 2013;4(2):145-51.
Rupp_2005_EduResEva	A	Rupp AA. Quantifying subpopulation differences for a lack of invariance using complex examinee profiles: An exploratory multigroup approach using functional data analysis. Educational Research and Evaluation. 2005;11(1):71-97.
Rush_2003_BioPsy	A	Rush A, Trivedi MH, Ibrahim HM, Carmody TJ, Arnow B, Klein DN, et al. The 16-item Quick Inventory of Depressive Symptomatology (QIDS), clinician rating (QIDS-C), and self-report (QIDS-SR): A psychometric evaluation in patients with chronic major depression. Biological Psychiatry. 2003;54(5):573-83.
Sabah_2011_JIRSEA	A	Sabah S, Al Basheer A, Barham A, Fayez M. Jordanian college students' perceptions of inquiry experiences in science laboratories. Journal of Institutional Research South East Asia. 2011;9(2):36-47.
Sabah_2013_JBSciEdu	A	Sabah S, Hammouri H, Akour M. Validation of a scale of attitudes toward science across countries using rasch model: Findings from timss. Journal of Baltic Science Education. 2013;12(5):692-702.
Sabariego_2015_PLOSONE_B	A	Sabariego C, Coenen M, Ballert C, Cabello M, Leonardi M, Anczewska M, et al. Determinants of psychosocial difficulties experienced by persons with brain disorders: Towards a 'horizontal epidemiology' approach. PLoS ONE. 2015;10(12).
Sadeh_2012_SPsyQua	A	Sadeh SS, Burns MK, Sullivan AL. Examining an executive function rating scale as a predictor of achievement in children at risk for behavior problems. School Psychology Quarterly. 2012;27(4):236-46.
Saha_2014_JEBCAM	A	Saha S, Koley M, Mahoney ER, Hibbard J, Ghosh S, Nag G, et al. Patient Activation Measures in a Government Homeopathic Hospital in India. Journal of Evidence-Based Complementary and Alternative Medicine. 2014;19(4):253-9.
Salaffi_2013_CERheu_A	A	Salaffi F, Franchignoni F, Giordano A, Ciapetti A, Sarzi-Puttini P, Ottonello M. Psychometric characteristics of the italian version of the revised fibromyalgia impact questionnaire using classical test theory and rasch analysis. Clinical and Experimental Rheumatology. 2013;31(SUPPL.79):41-9.
Sam_2013_EJPaeNeu	A	Sam KL, Wang HY, Li C, Lo SK. Item hierarchy of the Chinese version of cerebral palsy quality of life for children. European Journal of Paediatric Neurology. 2013;17(2):126-34.
SanchezGarcia_2015_PsyAss	A	Sanchez-Garcia M, Fernandez-Calderon F, Carmona-Marquez J, Chico-Garcia M, Velez-Moreno A, Perez-Gomez L. Psychometric properties and adaptation of the ASRS in a Spanish sample of patients with substance use disorders: Application of two IRT rasch models. Psychological Assessment. 2015;27(2):524-33.
Santau_2011_SciEdu	A	Santau AO, Maerten-Rivera JL, Huggins AC. Science achievement of English language learners in urban elementary schools: Fourth-grade student achievement results from a professional development intervention. Science Education. 2011;95(5):771-93.
SantosS_2015_SJP	A	Santos S, Viana FL, Ribeiro I, Prieto G, Brandao S, Cadime I. Development of listening comprehension tests with narrative and expository texts for Portuguese students. The Spanish Journal of Psychology. 2015;18.
Sarama_2012_JREduEff_B	A	Sarama J, Clements DH, Wolfe CB, Spitler ME. Longitudinal Evaluation of a Scale-Up Model for Teaching Mathematics With Trajectories and Technologies. Journal of Research on Educational Effectiveness. 2012;5(2):105-35.
Sargento_2015_SleBre	A	Sargento P, Perea V, Ladera V, Lopes P, Oliveira J. The Epworth Sleepiness Scale in Portuguese adults: from classical measurement theory to Rasch model analysis. Sleep and Breathing. 2015;19(2):693-701.
Sauer_2011_Religions	A	Sauer S, Walach H, Offenbächer M, Lynch S, Kohls N. Measuring mindfulness: A rasch analysis of the freiburg mindfulness inventory. Religions. 2011;2(4):693-706.
Scanlan_2011_LeiStu_B	A	Scanlan JN, Bundy AC, Matthews LR. Health and meaningfulness of time use for unemployed individuals: Associations with involvement in education. Leisure Studies. 2011;30(1):21-31.
Scanlan_2013_PsychiRes	A	Scanlan JN, Still M. Functional profile of mental health consumers assessed by occupational therapists: Level of independence and associations with functional cognition. Psychiatry Research. 2013;208(1):29-32.
Scanlan_2015_AOTJ_A	A	Scanlan JN, Argent S, Ayling B, Mouawad A, Woodward M. The development and pilot testing of an occupational therapy group participation rating scale for inpatient mental health settings. Australian Occupational Therapy Journal. 2015;62(5):333-40.
Scantlebury_2001_JRST	A	Scantlebury K, Boone W, Kahle JB, Fraser BJ. Design, validation, and use of an evaluation instrument for monitoring systemic reform. Journal of Research in Science Teaching. 2001;38(6):646-62.
Schalet_2014_JAD	A	Schalet BD, Cook KF, Choi SW, Cella D. Establishing a common metric for self-reported anxiety: Linking the MASQ, PANAS, and GAD-7 to PROMIS Anxiety. Journal of Anxiety Disorders. 2014;28(1):88-96.
Schalet_2015_JGIM_A	A	Schalet BD, Revicki DA, Cook KF, Krishnan E, Fries JF, Cella D. Establishing a Common Metric for Physical Function: Linking the HAQ-DI and SF-36 PF Subscale to PROMIS® Physical Function. Journal of General Internal Medicine. 2015;30(10):1517-23.
Schalet_2015_JGIM_B	A	Schalet BD, Rothrock NE, Hays RD, Kazis LE, Cook KF, Rutsohn JP, et al. Linking Physical and Mental Health Summary Scores from the Veterans RAND 12-Item Health Survey (VR-12) to the PROMIS® Global Health Scale. Journal of General Internal Medicine. 2015;30(10):1524-30.
Scherman_2011_EduResEva	A	Scherman V, Howie SJ, Bosker RJ. Constructing benchmarks for monitoring purposes: Evidence from South Africa. Educational Research and Evaluation. 2011;17(6):511-25.
ScholtenI_2002_HigEdu	A	Scholten I, Keeves JP, Lawson MJ. Validation of a free response test of deep learning about the normal swallowing process. Higher Education. 2002;44(2):233-55.
Schroeders_2015_Intelli	A	Schroeders U, Schipolowski S, Wilhelm O. Age-related changes in the mean and covariance structure of fluid and crystallized intelligence in childhood and adolescence. Intelligence. 2015;48:15-29.
Schumacker_2004_JAM	A	Schumacker RE. Rasch measurement using dichotomous scoring. Journal of Applied Measurement. 2004;5(3):328-49.
Schwartz_2012_APMR_A	A	Schwartz CE, Bode RK, Quaranto R, Vollmer T. The symptom inventory disability-specific short forms for multiple sclerosis: Reliability and factor structure. Archives of Physical Medicine and Rehabilitation. 2012;93(9).
Schwartz_2012_APMR_B	A	Schwartz CE, Bode RK, Quaranto BR, Vollmer T. The symptom inventory disability-specific short forms for multiple sclerosis: Construct validity, responsiveness, and interpretation. Archives of Physical Medicine and Rehabilitation. 2012;93(9).
Segui_2015_JCE	A	Seguí MDM, Cabrero-García J, Crespo A, Verdú J, Ronda E. A reliable and valid questionnaire was developed to measure computer vision syndrome at the workplace. Journal of Clinical Epidemiology. 2015;68(6):662-73.
Settanni_2015_FiP	A	Settanni M, Longobardi C, Sclavo E, Fraire M, Prino LE. Development and psychometric analysis of the student-teacher relationship scale - Short form. Frontiers in Psychology. 2015;6(JUN).
Shih_2013_ComEdu_A	A	Shih CL, Chuang HH. The development and validation of an instrument for assessing college students' perceptions of faculty knowledge in technology-supported class environments. Computers and Education. 2013;63:109-18.
Shih_2013_ViH_B	A	Shih CL, Chen CH, Sheu CF, Lang HC, Hsieh CL. Validating and improving the reliability of the EORTC QLQ-C30 using a multidimensional rasch model. Value in Health. 2013;16(5):848-54.
Shiu_2013_Intelli	A	Shiu W, Beaujean A, Must O, te Nijenhuis J, Must A. An item-level examination of the Flynn effect on the National Intelligence Test in Estonia. Intelligence. 2013;41(6):770-9.
Shue_2012_LPolSch	A	Shue PL, Shore RA, Lambert RG. Prekindergarten in Public Schools: An Examination of Elementary School Principals' Perceptions, Needs, and Confidence Levels in North Carolina. Leadership and Policy in Schools. 2012;11(2):216-33.
Sideridis_2013_JLeaDis	A	Sideridis G, Padeliadu S. Creating a Brief Rating Scale for the Assessment of Learning Disabilities Using Reliability and True Score Estimates of the Scale's Items Based on the Rasch Model. Journal of Learning Disabilities. 2013;46(2):115-32.
Sierakowska_2015_QoLR	A	Sierakowska M, Sierakowski S, Sierakowska J, Horton M, Ndosi M. Developing the Polish Educational Needs Assessment Tool (Pol-ENAT) in rheumatoid arthritis and systemic sclerosis: a cross-cultural validation study using Rasch analysis. Quality of Life Research. 2015;24(3):721-33.
Simone_2011_IJRehRes	A	Simone A, Rota V, Tesio L, Perucca L. Generic ABILHAND questionnaire can measure manual ability across a variety of motor impairments. International Journal of Rehabilitation Research. 2011;34(2):131-40.
Simons_2012_AddBeh	A	Simons JS, Dvorak RD, Merrill JE, Read JP. Dimensions and severity of marijuana consequences: Development and validation of the Marijuana Consequences Questionnaire (MACQ). Addictive Behaviors. 2012;37(5):613-21.
Sjaastad_2013_IJSE	A	Sjaastad J. Measuring the Ways Significant Persons Influence Attitudes Towards Science and Mathematics. International Journal of Science Education. 2013;35(2):192-212.
Skalicky_2015_CEO	A	Skalicky SE, Martin KR, Fenwick E, Crowston JG, Goldberg I, McCluskey P. Cataract and quality of life in patients with glaucoma. Clinical and Experimental Ophthalmology. 2015;43(4):335-41.
Skibbe_2012_SStuRea	A	Skibbe LE, Grimm KJ, Bowles RP, Morrison FJ. Literacy growth in the academic year versus summer from preschool through second grade: Differential effects of schooling across four skills. Scientific Studies of Reading. 2012;16(2):141-65.
Skold_2011_DMCN	A	Sköld A, Hermansson LN, Krumlinde-Sundholm L, Eliasson AC. Development and evidence of validity for the Children's Hand-use Experience Questionnaire (CHEQ). Developmental Medicine and Child Neurology. 2011;53(5):436-42.
Slade_2002_JRehMed	A	Slade A, Tennant A, Chamberlain MA. A randomised controlled trial to determine the effect of intensity of therapy upon length of stay in a neurological rehabilitation setting. Journal of Rehabilitation Medicine. 2002;34(6):260-6.
SmithC_2012_POTPed	A	Smith C, Wallen M, Walker K, Bundy A, Rolinson R, Badawi N. Validity of the fine motor area of the 12-month ages and stages questionnaire in infants following major surgery. Physical and Occupational Therapy in Pediatrics. 2012;32(3):260-71.
SmithHJ_2005_AOphth	A	Smith HJ, Dickinson CM, Cacho I, Reeves BC, Harper RA. A randomized controlled trial to determine the effectiveness of prism spectacles for patients with age-related macular degeneration. Archives of Ophthalmology. 2005;123(8):1042-50.
SmithJEV_2001_JAM_B	A	Smith Jr EV, Dupeyrat C. Toward establishing a unified metric for performance and learning goal orientations. Journal of Applied Measurement. 2001;2(4):312-36.
SmithKH_2004_JITPra	A	Smith KH, Barnard J. The psychometric properties of the Invitational School Survey (ISS): An Australian study. Journal of Invitational Theory and Practice. 2004;10:7-26.
SmithRM_2004_JAM	A	Smith RM, Taylor PA. Equating rehabilitation outcome scales: Developing common metrics. Journal of Applied Measurement. 2004;5(3):229-42.
Sointu_2014_EJPsyEdu	A	Sointu ET, Savolainen H, Lambert MC, Lappalainen K, Epstein MH. Behavioral and emotional strength-based assessment of Finnish elementary students: Psychometrics of the BERS-2. European Journal of Psychology of Education. 2014;29(1):1-19.
Solari_2014_MulSclJ	A	Solari A, Grzeda M, Giordano A, Mattarozzi K, D'Alessandro R, Simone A, et al. Use of Rasch analysis to refine a patient-reported questionnaire on satisfaction with communication of the multiple sclerosis diagnosis. Multiple Sclerosis Journal. 2014;20(9):1224-33.
Sondergeld_2014_SciEdu	A	Sondergeld TA, Johnson CC. Using Rasch Measurement for the Development and Use of Affective Assessments in Science Education Research. Science Education. 2014;98(4):581-613.
SousaLB_2015_ResAgi	A	Sousa LB, Prieto G, Vilar M, Firmino H, Simões MR. The Adults and Older Adults Functional Assessment Inventory: A Rasch Model Analysis. Research on Aging. 2015;37(8):787-814.
Spooren_2013_SpinCord_A	A	Spooren AIF, Arnould C, Smeets RJEM, Bongers HMH, Seelen HAM. Improvement of the Van Lieshout hand function test for Tetraplegia using a Rasch analysis. Spinal Cord. 2013;51(10):739-44.
Spooren_2013_SpinCord_B	A	Spooren AIF, Arnould C, Smeets RJEM, Snoek G, Seelen HAM. Reference values for the transformed Van Lieshout hand function test for tetraplegia. Spinal Cord. 2013;51(10):745-9.
Spruiell_2011_JAAPLaw	A	Spruiell GL, Hauser MJ, Commons ML, Drogin EY. Clinicians imagine a patient's view: Rating disclosures of confidential information. Journal of the American Academy of Psychiatry and the Law. 2011;39(3):379-86.
Stark_2001_JAppPsy	A	Stark S, Chernyshenko OS, Chan KY, Lee WC, Drasgow F. Effects of the testing situation on item responding: Cause for concern. Journal of Applied Psychology. 2001;86(5):943-53.
Stark_2014_MilPsy	A	Stark S, Chernyshenko OS, Drasgow F, Nye CD, White LA, Heffner T, et al. From ABLE to TAPAS: A new generation of personality tests to support military selection and classification decisions. Military Psychology. 2014;26(3):153-64.
Stelmack_2004_IOVS_A	A	Stelmack JA, Szlyk JP, Stelmack TR, Demers-Turco P, Williams RT, Moran D, et al. Psychometric properties of the Veterans Affairs Low-Vision Visual Functioning Questionnaire. Investigative Ophthalmology and Visual Science. 2004;45(11):3919-28.
Stelmack_2004_JRRD_B	A	Stelmack J, Szlyk JP, Stelmack T, Babcock-Parziale J, Demers-Turco P, Williams RT, et al. Use of Rasch person-item map in exploratory data analysis: A clinical perspective. Journal of Rehabilitation Research and Development. 2004;41(2):233-41.
StevensonCE_2014_FiP	A	Stevenson CE, Alberto RA, van den Boom MA, de Boeck PAL. Visual relations children find easy and difficult to process in figural analogies. Frontiers in Psychology. 2014;5(AUG).
Stock_2013_FamMed	A	Stock R, Mahoney E, Carney PA. Measuring team development in clinical care settings. Family Medicine. 2013;45(10):691-700.
Straube_2013_TStrReh	A	Straube D, Moore J, Leech K, Hornby T. Item analysis of the berg balance scale in individuals with subacute and chronic stroke. Topics in Stroke Rehabilitation. 2013;20(3):241-9.
Strong_2003_DruAlcDep_A	A	Strong DR, Kahler CW, Ramsey SE, Brown RA. Finding order in the DSM-IV nicotine dependence syndrome: A Rasch analysis. Drug and Alcohol Dependence. 2003;72(2):151-62.
Strong_2003_NTRes_B	A	Strong DR, Brown RA, Ramsey SE, Myers MG. Nicotine dependence measures among adolescents with psychiatric disorders: Evaluating symptom expression as a function of dependence severity. Nicotine and Tobacco Research. 2003;5(5):735-46.
Strong_2004_AddBeh	A	Strong DR, Lesieur HR, Breen RB, Stinchfield R, Lejuez CW. Using a Rasch model to examine the utility of the South Oaks Gambling Screen across clinical and community samples. Addictive Behaviors. 2004;29(3):465-81.
Strong_2005_PID	A	Strong DR, Kahler CW, Greene RL, Schinka J. Isolating a primary dimension within the Cook-Medley hostility scale: A Rasch analysis. Personality and Individual Differences. 2005;39(1):21-33.
Strout_2014_JNurMea	A	Strout K, Howard EP. Application of the rasch model to measure five dimensions of wellness in community-dwelling older adults. Journal of Nursing Measurement. 2014;22(2):268-90.
Strout_2015_JHolNur	A	Strout KA, Howard EP. Five Dimensions of Wellness and Predictors of Cognitive Health Protection in Community-Dwelling Older Adults: A Historical COLLAGE Cohort Study. Journal of Holistic Nursing. 2015;33(1):6-18.
Su_2013_IJRehRes	A	Su CY, Lin YH, Wu YY, Wuang YP. Development of the Chinese version of the Hooper visual organization test: Normative data. International Journal of Rehabilitation Research. 2013;36(1):56-67.
Suhonen_2013_JCliNur	A	Suhonen R, Schmidt LA, Katajisto J, Berg A, Idvall E, Kalafati M, et al. Cross-cultural validity of the Individualised Care Scale - A Rasch model analysis. Journal of Clinical Nursing. 2013;22(5-6):648-60.
Sussman_2013_MECD	A	Sussman J, Beaujean AA, Worrell FC, Watson S. An analysis of cross racial identity scale scores using classical test theory and rasch item response models. Measurement and Evaluation in Counseling and Development. 2013;46(2):136-53.
SwartzCW_2014_JAM	A	Swartz CW, Burdick DS, Hanlon ST, Stenner A, Kyngdon A, Burdick H, et al. Toward a theory relating text complexity, reader ability, and reading comprehension. Journal of Applied Measurement. 2014;15(4):359-71.
Swigris_2014_RespMed	A	Swigris JJ, Streiner DL, Brown KK, Belkin A, Green KE, Wamboldt FS, et al. Assessing exertional dyspnea in patients with idiopathic pulmonary fibrosis. Respiratory Medicine. 2014;108(1):181-8.
Szilagyi_2013_JRMatEdu	A	Szilágyi J, Clements DH, Sarama J. Young children's understandings of length measurement: Evaluating a learning trajectory. Journal for Research in Mathematics Education. 2013;44(3):581-620.
Taasoobshirazi_2015_IJSE	A	Taasoobshirazi G, Bailey M, Farley J. Physics Metacognition Inventory Part II: Confirmatory factor analysis and Rasch analysis. International Journal of Science Education. 2015;37(17):2769-86.
Talib_2012_JSofEng	A	Talib AM, Atari R, Abdullah R, Murad MAA. Security facilitation in collaborative cloud data storage implementation environment based on multi agent system architecture. Journal of Software Engineering. 2012;6(3):49-64.
Tanaka_2013_System	A	Tanaka M. Examining kanji learning motivation using self-determination theory. System. 2013;41(3):804-16.
Tanaka_2015_JATEFL	A	Tanaka M. Exploring motivational changes for short in-class extensive reading. Journal of Asia TEFL. 2015;12(4):61-91.
TanCY_2012_AJSPsy	A	Tan CY. Understanding Asian parenting from a Rasch perspective. Asian Journal of Social Psychology. 2012;15(4):273-83.
Tang_2011_JCE	A	Tang K, Beaton DE, Gignac MAM, Bombardier C. Rasch analysis informed modifications to the Work Instability Scale for Rheumatoid Arthritis for use in work-related upper limb disorders. Journal of Clinical Epidemiology. 2011;64(11):1242-51.
TanJB_2011_SPsyEdu	A	Tan JB, Yates S. Academic expectations as sources of stress in Asian students. Social Psychology of Education. 2011;14(3):389-407.
Tarbell_2004_AJOT	A	Tarbell MH, Henry AD, Coster WJ. Psychometric properties of the scorable self-care evaluation. American Journal of Occupational Therapy. 2004;58(3):324-32.
Tavakol_2014_JNurMea	A	Tavakol M, Rahimi-Madiseh M, Dennick R. Postexamination analysis of objective tests using the three-parameter item response theory. Journal of Nursing Measurement. 2014;22(1):94-105.
TaylorCS_2012_AMeaEdu	A	Taylor CS, Lee Y. Gender DIF in Reading and Mathematics Tests With Mixed Item Formats. Applied Measurement in Education. 2012;25(3):246-80.
TaylorJM_2015_PsyAss	A	Taylor JM. Psychometric analysis of the ten-item perceived stress scale. Psychological Assessment. 2015;27(1):90-101.
TaylorWJ_2012_JCliRhe	A	Taylor WJ, House M, Horne A, McQueen FM, Dalbeth N. The work instability scale predicts absenteeism in people with gout and suggests a higher risk for those in manual occupations. Journal of Clinical Rheumatology. 2012;18(8):405-10.
Teale_2013_APMR	A	Teale EA, Munyombwe TM, Young JB. Scaling properties of the subjective index of physical and social outcome after stroke in a study population unselected by age. Archives of Physical Medicine and Rehabilitation. 2013;94(12):2448-55.
Teicher_2015_PLOSONE	A	Teicher MH, Parigger A. The 'Maltreatment and Abuse Chronology of Exposure' (MACE) scale for the retrospective assessment of abuse and neglect during development. PLoS ONE. 2015;10(2).
Tejada_2011_PsyRep	A	Tejada AJR, Luque MN, Rojas OML, Moreno PJP. Prejudiced attitude measurement using the rasch rating scale model. Psychological Reports. 2011;109(2):553-72.
Teksoz_2014_EnvEduRes	A	Teksoz G, Boone J, Tuzun O, Oztekin C. An evaluation of the environmental literacy of preservice teachers in Turkey through Rasch analysis. Environmental Education Research. 2014;20(2):202-27.
Teman_2013_JAM	A	Teman ED. A Rasch analysis of the Statistical Anxiety Rating Scale. Journal of Applied Measurement. 2013;14(4):414-34.
TenKlooster_2013_HQoLO	A	Ten Klooster PM, Oude Voshaar MAH, Gandek B, Rose M, Bjorner JB, Taal E, et al. Development and evaluation of a crosswalk between the SF-36 physical functioning scale and Health Assessment Questionnaire disability index in rheumatoid arthritis. Health and Quality of Life Outcomes. 2013;11(1).
Tennant_2004_MedCar_A	A	Tennant A, Penta M, Tesio L, Grimby G, Thonnard JL, Slade A, et al. Assessing and adjusting for cross-cultural validity of impairment and activity limitation scales through differential item functioning within the framework of the Rasch model: the PRO-ESOR project. Medical Care. 2004;42(1 Suppl).
Teresi_2015_PalMed	A	Teresi JA, Ocepek-Welikson K, Ramirez M, Kleinman M, Ornstein K, Siu A. Evaluation of measurement equivalence of the family satisfaction with the end-of-life care in an ethnically diverse cohort: Tests of differential item functioning. Palliative Medicine. 2015;29(1):83-96.
Tesio_2015_JAM	A	Tesio L, Simone A, Grzeda MT, Ponzio M, Dati G, Zaratin P, et al. Funding medical research projects: Taking into account referees' severity and consistency through many-faceted Rasch modeling of projects' scores. Journal of Applied Measurement. 2015;16(2):129-52.
Thissen_2011_QoLR	A	Thissen D, Varni JW, Stucky BD, Liu Y, Irwin DE, DeWalt DA. Using the PedsQLTM 3.0 asthma module to obtain scores comparable with those of the PROMIS pediatric asthma impact scale (PAIS). Quality of Life Research. 2011;20(9):1497-505.
Thomas_2015_OTJROPH	A	Thomas S, Bundy AC, Black D, Lane SJ. Toward early identification of sensory over-responsivity (SOR): A construct for predicting difficulties with sleep and feeding in infants. OTJR Occupation, Participation and Health. 2015;35(3):178-86.
ThompsonJ_2013_JAM	A	Thompson JJ, Yang T, Chauvin SW. Rasch analysis for the evaluation of rank of student response time in multiple choice examinations. Journal of Applied Measurement. 2013;14(4):375-88.
Thurman_2013_AEFLJ	A	Thurman J. Choice and its influence on intrinsic motivation and output in task-based language teaching. Asian EFL Journal. 2013;15(1):202-45.
Tian_2014_APMR	A	Tian F, Ni P, Mulcahey MJ, Hambleton RK, Tulsky D, Haley SM, et al. Tracking functional status across the spinal cord injury lifespan: Linking pediatric and adult patient-reported outcome scores. Archives of Physical Medicine and Rehabilitation. 2014;95(11):2078-85.
Timler_2014_TLanDis	A	Timler GR, Boone WJ, Bergmann AA. Development of the conversation participation rating scale: Intervention planning implications for two school-age children with autism spectrum disorders. Topics in Language Disorders. 2014;34(3):252-67.
Tormakangas_2011_EduResEva	A	Törmäkangas K. Advantages of the Rasch measurement model in analysing educational tests: An applicator's reflection. Educational Research and Evaluation. 2011;17(5):307-20.
Tractenberg_2013_AHSciEdu	A	Tractenberg RE, Gushta MM, Mulroney SE, Weissinger PA. Multiple choice questions can be designed or revised to challenge learners' critical thinking. Advances in Health Sciences Education. 2013;18(5):945-61.
TrentHaines_2015_IMHNur	A	Trent Haines R, Jackson AD, Thomas EL. Evaluating the Orbach Mikulincer Mental Pain Scale among Late Adolescent and Early Adult African Americans: A Rasch Analysis. Issues in Mental Health Nursing. 2015;36(10):761-72.
Tretter_2013_JSTeaEdu	A	Tretter TR, Brown SL, Bush WS, Saderholm JC, Holmes VL. Valid and Reliable Science Content Assessments for Science Teachers. Journal of Science Teacher Education. 2013;24(2):269-95.
Trippe_2014_MilPsy	A	Trippe DM, Moriarty KO, Russell TL, Carretta TR, Beatty AS. Development of a cyber/information technology knowledge test for military enlisted technical training qualification. Military Psychology. 2014;26(3):182-98.
Trivedi_2004_PsyMed	A	Trivedi MH, Rush A, Ibrahim H, Carmody T, Biggs M, Suppes T, et al. The Inventory of Depressive Symptomatology, Clinician Rating (IDS-C) and Self-Report (IDS-SR), and the Quick Inventory of Depressive Symptomatology, Clinician Rating (QIDS-C) and Self-Report (QIDS-SR) in public sector patients with mood disorders: A psychometric evaluation. Psychological Medicine. 2004;34(1):73-82.
Tshilongamulenzhe_2015_RGCFMI	A	Tshilongamulenzhe MC. A rasch analysis of a measure of stakeholders inputs for the South African occupational learning context. Risk Governance and Control: Financial Markets and Institutions. 2015;5(3CONT1):93-103.
Tulsky_2015_JSCM_A	A	Tulsky DS, Kisala PA, Kalpakjian CZ, Bombardier CH, Pohlig RT, Heinemann AW, et al. Measuring depression after spinal cord injury: Development and psychometric characteristics of the SCI-QOL depression item bank and linkage with PHQ-9. Journal of Spinal Cord Medicine. 2015;38(3):335-46.
Tulsky_2015_JSCM_B	A	Tulsky DS, Kisala PA, Victorson D, Choi SW, Gershon R, Heinemann AW, et al. Methodology for the development and calibration of the SCI-QOL item banks. Journal of Spinal Cord Medicine. 2015;38(3):270-87.
Tulsky_2015_JSCM_C	A	Tulsky DS, Kisala PA, Victorson D, Tate DG, Heinemann AW, Charlifue S, et al. Overview of the Spinal Cord Injury - Quality of Life (SCI-QOL) measurement system. Journal of Spinal Cord Medicine. 2015;38(3):257-69.
Twiss_2015_QoLR	A	Twiss J, McKenna SP. Comparing the impact of psoriasis and atopic dermatitis on quality of life: co-calibration of the PSORIQoL and QoLIAD. Quality of Life Research. 2015;24(1):105-13.
Tyagi_2013_BMCHSRes	A	Tyagi RK, Cook L, Olson J, Belohlav J. Healthcare technologies, quality improvement programs and hospital organizational culture in Canadian hospitals. BMC Health Services Research. 2013;13(1).
Tymms_2004_BEResJ	A	Tymms P, Merrell C, Jones P. Using baseline assessment data to make international comparisons. British Educational Research Journal. 2004;30(5):673-89.
Vaingankar_2014_QoLR	A	Vaingankar JA, Subramaniam M, Abdin E, Picco L, Chua BY, Eng GK, et al. Development, validity and reliability of the short multidimensional positive mental health instrument. Quality of Life Research. 2014;23(5):1459-77.
vanBuuren_2014_SMMR	A	Van Buuren S. Growth charts of human development. Statistical Methods in Medical Research. 2014;23(4):346-68.
Vandenbroeck_2011_Eye	A	Vandenbroeck S, De Geest S, Zeyen T, Stalmans I, Dobbels F. Patient-reported outcomes (PRO's) in glaucoma: A systematic review. Eye. 2011;25(5):555-77.
vanderBeek_2013_NmD	A	van der Beek NA, Hagemans ML, van der Ploeg AT, van Doorn PA, Merkies IS. The Rasch-built Pompe-specific activity (R-PAct) scale. Neuromuscular disorders : NMD. 2013;23(3):256-64.
vandeVijver_2002_Intelli	A	Van De Vijver FJR. Inductive reasoning in Zambia, Turkey, and the Netherlands. Establishing cross-cultural equivalence. Intelligence. 2002;30(4):313-51.
Vellema_2015_FNutBul	A	Vellema W, Desiere S, D'Haese M. Verifying Validity of the Household Dietary Diversity Score: An Application of Rasch Modeling. Food and nutrition bulletin. 2015;37(1):27-41. Epub 2015/12/20.
Velozo_2001_AJPMReh	A	Velozo CA, Peterson EW. Developing meaningful fear of falling measures for community dwelling elderly. American Journal of Physical Medicine and Rehabilitation. 2001;80(9):662-73.
Vilagut_2015_JPsyRes	A	Vilagut G, Forero CG, Adroher ND, Olariu E, Cella D, Alonso J, et al. Testing the PROMIS® Depression measures for monitoring depression in a clinical sample outside the US. Journal of Psychiatric Research. 2015;68:140-50.
Violani_2003_CliNeu	A	Violani C, Lucidi F, Robusto E, Devoto A, Zucconi M, Strambi LF. The assessment of daytime sleep propensity: A comparison between the Epworth Sleepiness Scale and a newly developed Resistance to Sleepiness Scale. Clinical Neurophysiology. 2003;114(6):1027-33.
Vitterso_2005_SIR	A	Vittersø J, Biswas-Diener R, Diener E. The divergent meanings of life satisfaction: Item response modeling of the satisfaction with life scale in Greenland and Norway. Social Indicators Research. 2005;74(2):327-48.
VrachimiSouroulla_2011_EduPsy	A	Vrachimi-Souroulla A, Panayiotou G, Kokkinos CM, Lamprianou I. Achievement testing with the Wechsler Quicktest: An examination of its psychometric properties and applied utility with a Greek-Cypriot sample. Educational Psychology. 2011;31(1):105-21.
Wahl_2014_JCE	A	Wahl I, Löwe B, Bjorner JB, Fischer F, Langs G, Voderholzer U, et al. Standardization of depression measurement: A common metric was developed for 11 self-report depression measures. Journal of Clinical Epidemiology. 2014;67(1):73-86.
WalkerER_2014_EpiBeh	A	Walker ER, Engelhard G, Barmon C, McGee RE, Sterk CE, DiIorio C, et al. A mixed methods analysis of support for self-management behaviors: Perspectives of people with epilepsy and their support providers. Epilepsy and Behavior. 2014;31:152-9.
WalkerMJ_2014_EJPsy	A	Walker MJ, Panayides P. Rasch measurement in language research: Creating the foreign language classroom anxiety inventory. Europe's Journal of Psychology. 2014;10(4):613-36.
WalkerTD_2015_HQoLO	A	Walker TD, Desserich J, Albright K, Wamboldt FS, Belkin A, Fier K, et al. Development of ATAQ-LAM: A tool to assess quality of life in Lymphangioleiomyomatosis. Health and Quality of Life Outcomes. 2015;13(1).
Walton_2013_HQoLO_A	A	Walton DM, MacDermid JC. A brief 5-item version of the Neck Disability Index shows good psychometric properties. Health and Quality of Life Outcomes. 2013;11(1).
Walton_2013_PT_B	A	Walton D, Elliott JM. A higher-order analysis supports use of the 11-item version of the Tampa Scale for Kinesiophobia in people with neck pain. Physical Therapy. 2013;93(1):60-8.
Walton_2013_TCJouPai_C	A	Walton DM, Wideman TH, Sullivan MJL. A rasch analysis of the pain catastrophizing scale supports its use as an interval-level measure. Clinical Journal of Pain. 2013;29(6):499-506.
WangC_2013_IJEdR	A	Wang C, Kim DH, Bong M, Ahn HS. Examining measurement properties of an English Self-Efficacy scale for English language learners in Korea. International Journal of Educational Research. 2013;59:24-34.
WangCC_2015_TSC	A	Wang CC, Ho HC, Cheng YY. Building a learning progression for scientific imagination: A measurement approach. Thinking Skills and Creativity. 2015;17:1-14.
WangJ_2014_JAM	A	Wang J, Lin P-C, Li S-C. Measuring the ability of military aircrews to adapt to perceived stressors when undergoing centrifuge training. Journal of Applied Measurement. 2014;15(2):200-12.
Ward_2014_RDevDis	A	Ward KD, Chiarello LA, Bartlett DJ, Palisano RJ, McCoy SW, Avery L. Ease of Caregiving for Children: A measure of parent perceptions of the physical demands of caregiving for young children with cerebral palsy. Research in Developmental Disabilities. 2014;35(12):3403-15.
WareJE_2003_QoLR_B	A	Ware JE, Jr., Kosinski M, Bjorner JB, Bayliss MS, Batenhorst A, Dahlof CG, et al. Applications of computerized adaptive testing (CAT) to the assessment of headache impact. Quality of Life Research. 2003;12(8):935-52.
WareJE_2005_RehPsy	A	Ware Jr JE, Sinclair SJ, Gandek B, Bjorner JB. Item response theory and computerized adaptive testing: Implications for outcomes measurement in rehabilitation. Rehabilitation Psychology. 2005;50(1):71-8.
Warwick_2012_TMatApp	A	Warwick J. Assessing the efficacy of a student expectations questionnaire. Teaching Mathematics and its Applications. 2012;31(2):106-17.
Waugh_2002_BJEduPsy_A	A	Waugh RF. Measuring self-reported studying and learning for university students: Linking attitudes and behaviours on the same scale. British Journal of Educational Psychology. 2002;72(4):573-604.
Waugh_2002_JEduAdm_B	A	Waugh RF. Academic staff perceptions of administrative quality at universities. Journal of Educational Administration. 2002;40(2):172-88.
Waugh_2003_JAM_A	A	Waugh RF. Measuring Attitudes and Behaviors to Studying and Learning for University Students: A Rasch Measurement Model Analysis. Journal of Applied Measurement. 2003;4(2):164-80.
Waugh_2003_JAM_B	A	Waugh RF. Measuring Coping at a University Using a Rasch Model. Journal of Applied Measurement. 2003;4(4):370-85.
Waugh_2003_SEduEva_C	A	Waugh RF. Evaluation of quality of student experiences at a university using a Rasch measurement model. Studies in Educational Evaluation. 2003;29(2):145-68.
WeberC_2012_JPol	A	Weber C, Thornton M. Courting christians: How political candidates prime religious considerations in campaign ads. Journal of Politics. 2012;74(2):400-13.
Weiland_2012_EduPsy	A	Weiland C, Wolfe CB, Hurwitz MD, Clements DH, Sarama JH, Yoshikawa H. Early mathematics assessment: Validation of the short form of a prekindergarten and kindergarten mathematics measure. Educational Psychology. 2012;32(3):311-33.
WeiS_2012_JCheEdu	A	Wei S, Liu X, Wang Z, Wang X. Using rasch measurement to develop a computer modeling-based instrument to assess students' conceptual understanding of matter. Journal of Chemical Education. 2012;89(3):335-45.
WeiS_2014_IJSMatEdu	A	Wei S, Liu X, Jia Y. Using rasch measurement to validate the instrument of students’ understanding of models in science (SUMS). International Journal of Science and Mathematics Education. 2014;12(5):1067-82.
WeiY_2005_Portal	A	Wei Y, Thompson B, Cook CC. Scaling users' perceptions of liprary service quality using item response theory: A LibQUAL+™ study. Portal. 2005;5(1):93-104.
Wellman_2004_ChiDev	A	Wellman HM, Liu D. Scaling of theory-of-mind tasks. Child Development. 2004;75(2):523-41.
WellsN_2015_MCHJou	A	Wells N, Bronheim S, Zyzanski S, Hoover C. Psychometric Evaluation of a Consumer-Developed Family-Centered Care Assessment Tool. Maternal and Child Health Journal. 2015;19(9):1899-909.
Wesolowski_2015_MusSci	A	Wesolowski BC, Wind SA, Engelhard G. Rater fairness in music performance assessment: Evaluating model-data fit and differential rater functioning. Musicae Scientiae. 2015;19(2):147-70.
White_2004_APMR	A	White LJ, Straube D, Keehn MT. Using compensations to assess physical performance for ambulatory outpatients. Archives of Physical Medicine and Rehabilitation. 2004;85(9):1519-24.
Whiteneck_2011_APMR	A	Whiteneck GG, Dijkers MP, Heinemann AW, Bogner JA, Bushnik T, Cicerone KD, et al. Development of the participation assessment with recombined tools- Objective for use after traumatic brain injury. Archives of Physical Medicine and Rehabilitation. 2011;92(4):542-51.
Whiteneck_2012_JSCM	A	Whiteneck G, Gassaway J, Dijkers MP, Heinemann AW, Kreider SED. Relationship of patient characteristics and rehabilitation services to outcomes following spinal cord injury: The SCIRehab Project. Journal of Spinal Cord Medicine. 2012;35(6):484-502.
Whiteneck_2013_APMR	A	Whiteneck GG, Gassaway J. SCIRehab uses practice-based evidence methodology to associate patient and treatment characteristics with outcomes. Archives of Physical Medicine and Rehabilitation. 2013;94(4 SUPPL.).
Wilburn_2015_QoLR	A	Wilburn J, McKenna SP, Twiss J, Kemp K, Campbell S. Assessing quality of life in Crohn’s disease: development and validation of the Crohn’s Life Impact Questionnaire (CLIQ). Quality of Life Research. 2015;24(9):2279-88.
Wilkerson_2004_PARE	A	Wilkerson JR, Lang WS. A standards-driven, task-based assessment approach for teacher credentialing with potential for college accreditation. Practical Assessment, Research and Evaluation. 2004;9(12).
Wilkes_2011_AOTJ	A	Wilkes S, Cordier R, Bundy A, Docking K, Munro N. A play-based intervention for children with ADHD: A pilot study. Australian Occupational Therapy Journal. 2011;58(4):231-40.
WilkesGillan_2014_AJOT_A	A	Wilkes-Gillan S, Bundy A, Cordier R, Lincoln M. Evaluation of a pilot parent-delivered play-based intervention for children with attention deficit hyperactivity disorder. American Journal of Occupational Therapy. 2014;68(6):700-9.
WilkesGillan_2014_AOTJ_B	A	Wilkes-Gillan S, Bundy A, Cordier R, Lincoln M. Eighteen-month follow-up of a play-based intervention to improve the social play skills of children with attention deficit hyperactivity disorder. Australian Occupational Therapy Journal. 2014;61(5):299-307.
WilliamsB_2012_EHP_A	A	Williams B, Onsman A, Brown T. A Rasch and Factor Analysis of a Paramedic Graduate Attribute Scale. Evaluation and the Health Professions. 2012;35(2):148-68.
WilsonSR_2012_JACImm	A	Wilson SR, Rand CS, Cabana MD, Foggs MB, Halterman JS, Olson L, et al. Asthma outcomes: Quality of life. Journal of Allergy and Clinical Immunology. 2012;129(3 SUPPL.).
Winke_2011_LAssQua	A	Winke P. Investigating the reliability of the civics component of the U.S. Naturalization test. Language Assessment Quarterly. 2011;8(4):317-41.
Winke_2013_LanTes	A	Winke P, Gass S, Myford C. Raters' L2 background as a potential source of bias in rating oral performance. Language Testing. 2013;30(2):231-52.
Winstanley_2013_MelRes	A	Winstanley JB, Saw R, Boyle F, Thompson J. The FACT-melanoma quality-of-life instrument: Comparison of a five-point and four-point response scale using the Rasch measurement model. Melanoma Research. 2013;23(1):61-9.
Wirtz_2011_PEduCou	A	Wirtz M, Boecker M, Forkmann T, Neumann M. Evaluation of the "Consultation and Relational Empathy" (CARE) measure by means of Rasch-analysis at the example of cancer patients. Patient Education and Counseling. 2011;82(3):298-306.
Wolffsohn_2013_IJOphth	A	Wolffsohn JS, Jackson J, Hunt OA, Cottriall C, Lindsay J, Gilmour R, et al. An enhanced functional ability questionnaire (faVIQ) to measure the impact of rehabilitation services on the visually impaired. International Journal of Ophthalmology. 2013;7(1):77-85.
WongCK_2013_PT	A	Wong CK, Chen CC, Welsh J. Preliminary assessment of balance with the berg balance scale in adults who have a leg amputation and dwell in the community: Rasch rating scale analysis. Physical Therapy. 2013;93(11):1520-9.
WongHM_2011_CDOEpi	A	Wong HM, McGrath CPJ, King NM. Rasch validation of the early childhood oral health impact scale. Community Dentistry and Oral Epidemiology. 2011;39(5):449-57.
WongR_2012_AAJPsy	A	Wong R, Wu R, Guo C, Lam JK, Snowden LR. Culturally sensitive depression assessment for Chinese American Immigrants: Development of a comprehensive measure and a screening scale using an item response approach. Asian American Journal of Psychology. 2012;3(4):230-53.
Wooliscroft_2014_JMacromar	A	Wooliscroft B, Ganglmair-Wooliscroft A, Noone A. The Hierarchy of Ethical Consumption Behavior: The Case of New Zealand. Journal of Macromarketing. 2014;34(1):57-72.
WrightP_2011_PsyOnc	A	Wright P, Smith AB, Keding A, Velikova G. The Social Difficulties Inventory (SDI): Development of subscales and scoring guidance for staff. Psycho-Oncology. 2011;20(1):36-43.
Wustenberg_2012_Intelli	A	Wüstenberg S, Greiff S, Funke J. Complex problem solving - More than reasoning? Intelligence. 2012;40(1):1-14.
YangAS_2013_APManRev_A	A	Yang AS. Assessments in financial occupational exams. Asia Pacific Management Review. 2013;18(1):25-41.
YangAS_2013_JFSerRes_B	A	Yang AS. Decision Making for Individual Investors: A Measurement of Latent Difficulties. Journal of Financial Services Research. 2013;44(3):303-29.
YangAS_2015_ISAFM	A	Yang AS. Lottery Payment Cards: A Study of Mental Accounting. Intelligent Systems in Accounting, Finance and Management. 2015;22(3):201-26.
YangSC_2011_JCMAss	A	Yang SC, Tsou MY, Chen ET, Chan KH, Chang KY. Statistical item analysis of the examination in anesthesiology for medical students using the Rasch model. Journal of the Chinese Medical Association. 2011;74(3):125-9.
YanZh_2012_IJCBPL	A	Yan Z, Liu X. Internet vs. matter: Differences in students' concept development from elementary through high school. International Journal of Cyber Behavior, Psychology and Learning. 2012;2(4):60-72.
YanZi_2011_MPEES	A	Yan Z, Bond TG. Developing a rasch measurement physical fitness scale for hong kong primary school-aged students. Measurement in Physical Education and Exercise Science. 2011;15(3):182-203.
YanZi_2012_PsySpoExe	A	Yan Z, Mok MMC. Validating the coping scale for Chinese athletes using multidimensional Rasch analysis. Psychology of Sport and Exercise. 2012;13(3):271-9.
YanZi_2013_EduResEva	A	Yan Z, Coniam D. Assessing the ease of use in the environment and markers' acceptance of on screen marking: A Rasch measurement perspective. Educational Research and Evaluation. 2013;19(5):461-83.
YanZi_2014_AEPPP_A	A	Yan Z, Coniam D. The effects of key demographic variables on markers’ perceived ease of use and acceptance of onscreen marking. Assessment in Education: Principles, Policy and Practice. 2014;21(4):464-80.
YanZi_2014_EduResEva_B	A	Yan Z. Predicting teachers' intentions to implement school-based assessment using the theory of planned behaviour. Educational Research and Evaluation. 2014;20(2):83-97.
YanZi_2015_CJEdu_A	A	Yan Z, Sin KF. Exploring the intentions and practices of principals regarding inclusive education: an application of the Theory of Planned Behaviour. Cambridge Journal of Education. 2015;45(2):205-21.
YanZi_2015_JAM_B	A	Yan Z, Lum CW, Lui RTL, Chu SSW, Lui M. Measuring teaching assistants' efficacy using the Rasch model. Journal of Applied Measurement. 2015;16(1):60-75.
YanZi_2015_TTeaEdu_C	A	Yan Z, Cheng ECK. Primary teachers' attitudes, intentions and practices regarding formative assessment. Teaching and Teacher Education. 2015;45:128-36.
Yazdani_2015_IJPH	A	Yazdani K, Nedjat S, Karimlou M, Zeraati H, Mohammad K, Fotouhi A. Developing a shortened quality of life scale from Persian version of the WHOQOL-100 using the rasch analysis. Iranian Journal of Public Health. 2015;44(4):522-34.
Youn_2014_System	A	Youn SJ. Measuring syntactic complexity in L2 pragmatic production: Investigating relationships among pragmatics, grammar, and proficiency. System. 2014;42(1):270-87.
YoungGS_2011_DevPsy	A	Young GS, Rogers SJ, Hutman T, Rozga A, Sigman M, Ozonoff S. Imitation from 12 to 24 months in autism and typical development: A longitudinal rasch analysis. Developmental Psychology. 2011;47(6):1565-78.
YuL_2004_JAM	A	Yu L. Reporting the incidence of school violence across grade levels in the U.S. using the third international mathematics and science study (TIMSS). Journal of Applied Measurement. 2004;5(3):287-300.
Zaporozhets_2015_MECD	A	Zaporozhets O, Fox CM, Beltyukova SA, Laux JM, Piazza NJ, Salyers K. Refining change measure with the rasch model. Measurement and Evaluation in Counseling and Development. 2015;48(1):59-74.
Zebardast_2015_Ophtalmo	A	Zebardast N, Swenor BK, Van Landingham SW, Massof RW, Munoz B, West SK, et al. Comparing the impact of refractive and nonrefractive vision loss on functioning and disability: The salisbury eye evaluation. Ophthalmology. 2015;122(6):1102-10.
Zenk_2014_Appetite	A	Zenk SN, Horoi I, McDonald A, Corte C, Riley B, Odoms-Young AM. Ecological momentary assessment of environmental and personal factors and snack food intake in African American women. Appetite. 2014;83:333-41.
ZhangD_2015_TRRec	A	Zhang D, Xu X, Yang X. User satisfaction and its impacts on the use of a public bicycle system: Empirical studies from Hangzhou, China. Transportation Research Record2015. p. 56-65.
Zhong_2015_PLOSONE	A	Zhong QY, Gelaye B, Zaslavsky AM, Fann JR, Rondon MB, Sánchez SE, et al. Diagnostic validity of the generalized anxiety disorder - 7 (GAD-7) among pregnant women. PLoS ONE. 2015;10(4).
ZhuW_2001_RQExeSpo	A	Zhu W, Timm G, Ainsworth B. Rasch calibration and optimal categorization of an instrument measuring women's exercise perseverance and barriers. Research Quarterly for Exercise and Sport. 2001;72(2):104-16.
ZhuW_2011_MPEES_A	A	Zhu W, Fox C, Park Y, Fisette JL, Graber KC, Dyson B, et al. Development and calibration of an item bank for PE metrics assessments: Standard 1. Measurement in Physical Education and Exercise Science. 2011;15(2):119-37.
ZhuX_2012_MPEES	A	Zhu X, Sun H, Chen A, Ennis C. Measurement invariance of expectancy-value questionnaire in physical education. Measurement in Physical Education and Exercise Science. 2012;16(1):41-54.
Zill_2013_BMCPH	A	Zill JM, Dwinger S, Kriston L, Rohenkohl A, Härter M, Dirmaier J. Psychometric evaluation of the German version of the patient activation measure (PAM13). BMC Public Health. 2013;13(1).
ZuverzaChavarria_2011_RehPsy	A	Zuverza-Chavarria V, Tsanadis J. Measurement Properties of the CLOX Executive Clock Drawing Task in an Inpatient Stroke Rehabilitation Setting. Rehabilitation Psychology. 2011;56(2):138-44.
Aguado_2014_GroDyn	Mi	Aguado D, Rico R, Sánchez-Manzanares M, Salas E. Teamwork competency test (TWCT): A step forward on measuring teamwork competencies. Group Dynamics. 2014;18(2):101-21.
AllenJ_2013_BMCMRM	Mi	Allen J, Inder KJ, Lewin TJ, Attia JR, Kay-Lambkin FJ, Baker AL, et al. Integrating and extending cohort studies: Lessons from the eXtending Treatments, Education and Networks in Depression (xTEND) study. BMC Medical Research Methodology. 2013;13(1).
Barofsky_2012_QoLR	Mi	Barofsky I. Can quality or quality-of-life be defined? Quality of Life Research. 2012;21(4):625-31.
BarrettJJ_2002_JCPMedSet	Mi	Barrett JJ, Putzke JD, Richards JS. Early versus late onset of spinal cord injury among the elderly. Journal of Clinical Psychology in Medical Settings. 2002;9(3):219-26.
Bartlett_2015_PLOSONE	Mi	Bartlett SJ, Orbai AM, Duncan T, DeLeon E, Ruffing V, Clegg-Smith K, et al. Reliability and validity of selected PROMIS measures in people with rheumatoid arthritis. PLoS ONE. 2015;10(9).
BartramD_2013_JCCPsy	Mi	Bartram D. Scalar Equivalence of OPQ32: Big Five Profiles of 31 Countries. Journal of Cross-Cultural Psychology. 2013;44(1):61-83.
Bauer_2012_TCNeuropsy	Mi	Bauer RM, Iverson GL, Cernich AN, Binder LM, Ruff RM, Naugle RI. Computerized neuropsychological assessment devices: Joint position paper of the American academy of clinical neuropsychology and the national academy of neuropsychology. Clinical Neuropsychologist. 2012;26(2):177-96.
Besseris_2015_EJOR	Mi	Besseris GJ. Concurrent multiresponse non-linear screening: Robust profiling of webpage performance. European Journal of Operational Research. 2015;241(1):161-76.
BevansM_2014_NurOut_B	Mi	Bevans M, Ross A, Cella D. Patient-reported outcomes measurement information system (PROMIS): Efficient, standardized tools to measure self-reported health and quality of life. Nursing Outlook. 2014;62(5):339-45.
Blome_2015_ViH	Mi	Blome C, Augustin M. Measuring change in quality of life: Bias in prospective and retrospective evaluation. Value in Health. 2015;18(1):110-5.
Bohnke_2015_SPPE	Mi	Böhnke JR, Croudace TJ. Factors of psychological distress: clinical value, measurement substance, and methodological artefacts. Social Psychiatry and Psychiatric Epidemiology. 2015;50(4):515-24.
Boyce_2014_ImpSci	Mi	Boyce MB, Browne JP, Greenhalgh J. Surgeon's experiences of receiving peer benchmarked feedback using patient-reported outcome measures: A qualitative study. Implementation Science. 2014;9(1).
Bruder_2011_IJECSEdu	Mi	Bruder MB, Dunst CJ, Mogro-Wilson C. Confidence and competence appraisals of early intervention and preschool special education practitioners. International Journal of Early Childhood Special Education. 2011;3(1):13-37.
Cappelleri_2014_SMMR_B	Mi	Cappelleri JC, Bushmakin AG. Interpretation of patient-reported outcomes. Statistical Methods in Medical Research. 2014;23(5):460-83.
Carleton_2014_PsyAss	Mi	Carleton RN, Thibodeau MA, Weeks JW, Teale Sapach MJN, McEvoy PM, Horswill SC, et al. Comparing short forms of the social interaction anxiety scale and the social phobia scale. Psychological Assessment. 2014;26(4):1116-26.
CarmonaPerera_2013_DruAlcDep	Mi	Carmona-Perera M, Reyes del Paso GA, Pérez-García M, Verdejo-García A. Heart rate correlates of utilitarian moral decision-making in alcoholism. Drug and Alcohol Dependence. 2013;133(2):413-9.
Chard_2011_JOTSEI	Mi	Chard G, Pierse A. The Effect of Introducing Nonplay Items into a Primary School Playground in Ireland. Journal of Occupational Therapy, Schools, and Early Intervention. 2011;4(3-4):291-304.
Chatterji_2015_Lancet	Mi	Chatterji S, Byles J, Cutler D, Seeman T, Verdes E. Health, functioning, and disability in older adults - Present status and future implications. The Lancet. 2015;385(9967):563-75.
ChengI_2012_IEEEJSAC	Mi	Cheng I, Ying L, Basu A. Perceptually coded transmission of arbitrary 3D objects over burst packet loss channels enhanced with a generic JND formulation. IEEE Journal on Selected Areas in Communications. 2012;30(7):1184-92.
Cheung_2012_ORM	Mi	Cheung GW, Lau RS. A direct comparison approach for testing measurement invariance. Organizational Research Methods. 2012;15(2):167-98.
ChiuGS_2011_Environm	Mi	Chiu GS, Guttorp P, Westveld AH, Khan SA, Liang J. Latent health factor index: A statistical modeling approach for ecological health assessment. Environmetrics. 2011;22(3):243-55.
Christ_2015_ReaWri	Mi	Christ TJ, Ardoin SP. Commentary on new metrics, measures, and uses for fluency data. Reading and Writing. 2015;28(1):151-7.
Chung_2015_QoLR	Mi	Chung H, Kim J, Askew RL, Jones SMW, Cook KF, Amtmann D. Assessing measurement invariance of three depression scales between neurologic samples and community samples. Quality of Life Research. 2015;24(8):1829-34.
Church_2011_JPSocPsy	Mi	Church AT, Alvarez JM, Mai NTQ, French BF, Katigbak MS, Ortiz FA. Are cross-cultural comparisons of personality profiles meaningful? Differential item and facet functioning in the revised NEO personality inventory. Journal of Personality and Social Psychology. 2011;101(5):1068-89.
Cintas_2011_POTPed	Mi	Cintas HL, Parks R, Don S, Gerber L. Brief assessment of motor function: Content validity and reliability of the upper extremity gross motor scale. Physical and Occupational Therapy in Pediatrics. 2011;31(4):440-50.
Commons_2014_BDB_A	Mi	Commons ML, Miller LS, Giri S. A model of stage change explains the average rate of stage of development and its relationship to the predicted average stage ("smarts"). Behavioral Development Bulletin. 2014;19(4):1-11.
Commons_2015_BDB	Mi	Commons ML. Order of hierarchical complexity ("stage") of items used to measure forensic experts' perceptions of expert bias predicts the amount of bias. Behavioral Development Bulletin. 2015;20(1):106-13.
CookJ_2005_SAJP	Mi	Cook J, Muller M, Cutler I. The learning assessment centre and organisational transformation. South African Journal of Psychology. 2005;35(4):810-30.
DawsonTunik_2003_DevRev_B	Mi	Dawson TL, Gabrielian S. Developing conceptions of authority and contract across the lifespan: Two perspectives. Developmental Review. 2003;23(2):162-218.
deBoerJ_2014_EduRes	Mi	DeBoer J, Ho AD, Stump GS, Breslow L. Changing "Course": Reconceptualizing Educational Variables for Massive Open Online Courses. Educational Researcher. 2014;43(2):74-84.
deOliveira_2013_ESwA	Mi	De Oliveira MG, Marques Ciarelli P, Oliveira E. Recommendation of programming activities by multi-label classification for a formative assessment of students. Expert Systems with Applications. 2013;40(16):6641-51.
Desouky_2013_QoLR	Mi	Desouky TF, Mora PA, Howell EA. Measurement invariance of the SF-12 across European-American, Latina, and African-American postpartum women. Quality of Life Research. 2013;22(5):1135-44.
Duncan_2014_JPatSaf	Mi	Duncan JR, Tabriz D. Improving performance during image-guided procedures. Journal of Patient Safety. 2014;11(4):230-6.
Ehmke_2005_ZDM	Mi	Ehmke T, Wild E, Müller-Kalhoff T. Comparing adult mathematical literacy with PISA students: Results of a pilot study. ZDM - International Journal on Mathematics Education. 2005;37(3):159-67.
ElosuaOliden_2013_Psicoth	Mi	Elosua Oliden P, Mujika Lizaso J. Invariance levels across language versions of the PISA 2009 reading comprehension tests in Spain. Psicothema. 2013;25(3):390-5.
ElosuaOliden_2014_Psicoth	Mi	Elosua Oliden PE, Lizaso JM. Impact of family language and testing language on reading performance in a bilingual educational context. Psicothema. 2014;26(3):328-35.
Ercikan_2002_AMeaEdu	Mi	Ercikan K, Julian M. Classification Accuracy of Assigning Student Performance to Proficiency Levels: Guidelines for Assessment Design. Applied Measurement in Education. 2002;15(3):269-94.
Fekete_2011_AJPMReh	Mi	Fekete C, Boldt C, Post M, Eriks-Hoogland I, Cieza A, Stucki G. How to measure what matters: Development and application of guiding principles to select measurement instruments in an epidemiologic study on functioning. American Journal of Physical Medicine and Rehabilitation. 2011;90(11 SUPPL.).
Fortus_2014_JRST_A	Mi	Fortus D. Attending to affect. Journal of Research in Science Teaching. 2014;51(7):821-35.
Franchignoni_2014_JOSPT_A	Mi	Franchignoni F, Vercelli S, Giordano A, Sartorio F, Bravini E, Ferriero G. Minimal clinically important difference of the disabilities of the arm, shoulder and hand outcome measure (DASH) and its shortened version (quickDASH). Journal of Orthopaedic and Sports Physical Therapy. 2014;44(1):30-9.
Gaotlhobogwe_2011_EResearch	Mi	Gaotlhobogwe M, Laugharne J, Durance I. The potential of multivariate analysis in assessing students' attitude to curriculum subjects. Educational Research. 2011;53(1):65-83.
Gesthuizen_2013_QaQ	Mi	Gesthuizen M, Scheepers P, van der Veld W, Völker B. Structural aspects of social capital: Tests for cross-national equivalence in Europe. Quality and Quantity. 2013;47(2):909-22.
Ghaziani_2013_SJOT	Mi	Ghaziani E, Krogh AG, Lund H. Developing a Danish version of the "Impact on Participation and Autonomy Questionnaire". Scandinavian Journal of Occupational Therapy. 2013;20(3):190-200.
GibbonsCJ_2014_FiP	Mi	Gibbons CJ, Bee PE, Walker L, Price O, Lovell K. Service user- and carer-reported measures of involvement in mental health care planning: Methodological quality and acceptability to users. Frontiers in Psychiatry. 2014;5(DEC).
Glanzel_2013_Scientom	Mi	Glänzel W, Moed HF. Opinion paper: Thoughts and facts on bibliometric indicators. Scientometrics. 2013;96(1):381-94.
Gobert_2013_JLeaSci	Mi	Gobert JD, Sao Pedro M, Raziuddin J, Baker RS. From Log Files to Assessment Metrics: Measuring Students' Science Inquiry Skills Using Educational Data Mining. Journal of the Learning Sciences. 2013;22(4):521-63.
Goldhaber_2013_EEPolAna	Mi	Goldhaber DD, Goldschmidt P, Tseng F. Teacher Value-Added at the High-School Level: Different Models, Different Answers? Educational Evaluation and Policy Analysis. 2013;35(2):220-36.
GomezR_2013_JAttDis	Mi	Gomez R. DSM-IV ADHD Symptoms Self-Ratings by Adolescents: Test of Invariance Across Gender. Journal of Attention Disorders. 2013;17(1):3-10.
Grand_2015_AJouSta	Mi	Grand A, Dittrich R. Modelling assumed metric paired comparison data - Application to learning related emotions. Austrian Journal of Statistics. 2015;44(1):3-15.
Gross_2015_Epidem_A	Mi	Gross AL, Power MC, Albert MS, Deal JA, Gottesman RF, Griswold M, et al. Application of latent variable methods to the study of cognitive decline when tests change over time. Epidemiology. 2015;26(6):878-87.
Grossschedl_2013_SEduEva	Mi	Großschedl J, Harms U. Assessing conceptual knowledge using similarity judgments. Studies in Educational Evaluation. 2013;39(2):71-81.
Hafidi_2014_IJICTE	Mi	Hafidi M, Bensebaa T. Developing adaptive and intelligent tutoring systems (AITS): A general framework and its implementations. International Journal of Information and Communication Technology Education. 2014;10(4):70-85.
HansonEM_2015_RDevDis	Mi	Hanson EM, Sideridis G, Jackson FI, Porche K, Campe KL, Huntington N. Behavior and Sensory Interests Questionnaire: Validation in a sample of children with autism spectrum disorder and other developmental disability. Res Dev Disabil. 2015;48:160-75. Epub 2015/11/19.
HansonRK_2013_SexAbuJRT	Mi	Hanson RK, Babchishin KM, Helmus L, Thornton D. Quantifying the Relative Risk of Sex Offenders: Risk Ratios for Static-99R. Sexual Abuse: Journal of Research and Treatment. 2013;25(5):482-515.
Harstad_2015_JADevDis	Mi	Harstad EB, Fogler J, Sideridis G, Weas S, Mauras C, Barbaresi WJ. Comparing Diagnostic Outcomes of Autism Spectrum Disorder Using DSM-IV-TR and DSM-5 Criteria. Journal of Autism and Developmental Disorders. 2015;45(5):1437-50.
Hashizume_2015_NmD	Mi	Hashizume A, Katsuno M, Suzuki K, Banno H, Suga N, Mano T, et al. A functional scale for spinal and bulbar muscular atrophy: Cross-sectional and longitudinal study. Neuromuscular Disorders. 2015;25(7):554-62.
Hays_2001_AnMed	Mi	Hays RD, Morales LS. The RAND-36 measure of health-related quality of life. Annals of Medicine. 2001;33(5):350-7.
Heldsinger_2013_EResearch	Mi	Heldsinger SA, Humphry SM. Using calibrated exemplars in the teacher-assessment of writing: An empirical study. Educational Research. 2013;55(3):219-35.
Henning_2015_SAJP	Mi	Henning E, Ragpot L. Pre-school children's bridge to symbolic knowledge: First literature framework for a learning and cognition lab at a South African university. South African Journal of Psychology. 2015;45(1):71-80.
HillAnE_2012_OTPra	Mi	Hill AE, Chen C. The Manual Ability Measure in oncology an occupation-based hand assessment. OT Practice. 2012;17(11).
Hochweber_2014_JEduPsy	Mi	Hochweber J, Hosenfeld I, Klieme E. Classroom composition, classroom management, and the relationship between student attributes and grades. Journal of Educational Psychology. 2014;106(1):289-300.
Holly_2015_JACP	Mi	Holly LE, Little M, Pina AA, Caterino LC. Assessment of anxiety symptoms in school children: A cross-sex and ethnic examination. Journal of Abnormal Child Psychology. 2015;43(2):297-309.
Horan_2015_PsyAss	Mi	Horan JM, Brown JL, Jones SM, Aber J. Assessing invariance across sex and race/ethnicity in measures of youth psychopathic characteristics. Psychological Assessment. 2015;27(2):657-68.
HuC_2011_JVocBeh_A	Mi	Hu C, Pellegrini EK, Scandura TA. Measurement invariance in mentoring research: A cross-cultural examination across Taiwan and the U.S. Journal of Vocational Behavior. 2011;78(2):274-82.
HuC_2011_TJPsycho_B	Mi	Hu C, Wu TY, Wang YH. Measurement equivalence/invariance of the abusive supervision measure across workers from Taiwan and the United States. Journal of Psychology: Interdisciplinary and Applied. 2011;145(2):111-31.
Ivanova_2013_Aphasiol	Mi	Ivanova MV, Hallowell B. A tutorial on aphasia test development in any language: Key substantive and psychometric considerations. Aphasiology. 2013;27(8):891-920.
JensenMP_2015_Pain	Mi	Jensen MP, Smith AE, Alschuler KN, Gillanders DT, Amtmann D, Molton IR. The role of pain acceptance on function in individuals with disabilities: A longitudinal study. Pain. 2015;157(1):247-54.
JohnsonLB_2012_PMaRCNA	Mi	Johnson LB, Florence JM, Abresch RT. Physical therapy evaluation and management in neuromuscular diseases. Physical Medicine and Rehabilitation Clinics of North America. 2012;23(3):633-51.
Kenzik_2014_MDecMak	Mi	Kenzik KM, Tuli SY, Revicki DA, Shenkman EA, Huang IC. Comparison of 4 pediatric health-related quality-of-life instruments: A study on a medicaid population. Medical Decision Making. 2014;34(5):590-602.
Kimber_2015_PLOSONE	Mi	Kimber M, Rehm J, Ferro MA. Measurement invariance of the WHODAS 2.0 in a population-based sample of youth. PLoS ONE. 2015;10(11).
KimJiseon_2013_QoLR	Mi	Kim J, Chung H, Amtmann D, Revicki DA, Cook KF. Measurement invariance of the PROMIS pain interference item bank across community and clinical samples. Quality of Life Research. 2013;22(3):501-7.
KlineRB_2013_EduResEva	Mi	Kline RB. Assessing statistical aspects of test fairness with structural equation modelling. Educational Research and Evaluation. 2013;19(2-3):204-22.
Koop_2013_JudDecMak	Mi	Koop GJ. An assessment of the temporal dynamics of moral decisions. Judgment and Decision Making. 2013;8(5):527-39.
LambertRG_2014_JPsyEdAss	Mi	Lambert RG, Kim DH, Burts DC. Using Teacher Ratings to Track the Growth and Development of Young Children Using the Teaching Strategies GOLD® Assessment System. Journal of Psychoeducational Assessment. 2014;32(1):27-39.
Lange_2015_PCTRP_B	Mi	Lange R, Greyson B, Houran J. Using computational linguistics to understand near-death experiences: Concurrent validity for the Near Death Experience Scale. Psychology of Consciousness: Theory, Research, and Practice. 2015;2(1):79-89.
Lawrence_2003_DMHOut	Mi	Lawrence WF, Clancy CM. Health Outcomes Assessment in Cancer: Current Measurement Strategies and Recommendations for Improvement. Disease Management and Health Outcomes. 2003;11(11):709-21.
LinPY_2014_EaPM	Mi	Lin PY, Lin YC. Examining Student Factors in Sources of Setting Accommodation DIF. Educational and Psychological Measurement. 2014;74(5):759-94.
LiuHI_2005_IEEETEdu	Mi	Liu HI, Yang MN. QoL guaranteed adaptation and personalization in e-learning systems. IEEE Transactions on Education. 2005;48(4):676-87.
Loubser_2014_HSAGes	Mi	Loubser HJ, Bruce JC, Casteleijn D. The GAMMA® nursing measure: Its development and testing for nursing utility. Health SA Gesondheid. 2014;19(1).
Mahmud_2015_JAMAOph	Mi	Mahmud I, Kelley T, Stowell C, Haripriya A, Boman A, Kossler I, et al. A proposed minimum standard set of outcome measures for cataract surgery. JAMA Ophthalmology. 2015;133(11):1247-52.
Malec_2013_JHTraReh	Mi	Malec JF. Rehabilitation research: 30 years later; 30 years hence. Journal of Head Trauma Rehabilitation. 2013;28(3):227-31.
Mandrioli_2015_NeuSci	Mi	Mandrioli J, Biguzzi S, Guidi C, Sette E, Terlizzi E, Ravasio A, et al. Heterogeneity in ALSFRS-R decline and survival: a population-based study in Italy. Neurological Sciences. 2015;36(12):2243-52.
Matsueda_2014_SMRes	Mi	Matsueda RL, Drakulich KM. Measuring Collective Efficacy: A Multilevel Measurement Model for Nested Data. Sociological Methods and Research. 2014;45(2):191-230.
Moss_2012_JSAlcDru	Mi	Moss HB, Chen CM, Yi HY. Measures of substance consumption among substance users, DSM-IV abusers, and those with DSM-IV dependence disorders in a nationally representative sample. Journal of Studies on Alcohol and Drugs. 2012;73(5):820-8.
Motl_2004_RQExeSpo	Mi	Motl RW, Dishman RK, Dowda M, Pate RR. Factorial validity and invariance of a self-report measure of physical activity among adolescent girls. Research Quarterly for Exercise and Sport. 2004;75(3):259-71.
NeumannCS_2012_BSLaw	Mi	Neumann CS, Schmitt DS, Carter R, Embley I, Hare RD. Psychopathic Traits in Females and Males across the Globe. Behavioral Sciences and the Law. 2012;30(5):557-74.
Okada_2011_Behavior	Mi	Okada K, Mayekawa S-i. Bayesian nonmetric successive categories multidimensional scaling. Behaviormetrika. 2011;38(1):17-31.
Pardhan_2015_IOVS	Mi	Pardhan S, Latham K, Tabrett D, Timmis MA. Objective analysis of performance of activities of daily living in people with central field loss. Investigative Ophthalmology and Visual Science. 2015;56(12):7169-78.
Pattison_2002_SocNet	Mi	Pattison PE, Breiger RL. Lattices and dimensional representations: Matrix decompositions and ordering structures. Social Networks. 2002;24(4):423-44.
Pawlowski_2013_PsyNeu	Mi	Pawlowski J, Segabinazi JD, Wagner F, Bandeira DR. A systematic review of validity procedures used in neuropsychological batteries. Psychology and Neuroscience. 2013;6(3):311-29.
Perneger_2013_QoLR	Mi	Perneger TV, Gayet-Ageron A, Courvoisier DS, Agoritsas T, Cullati S. Self-rated health: Analysis of distances and transitions between response options. Quality of Life Research. 2013;22(10):2761-8.
Pizzimenti_2015_AnSciEdu	Mi	Pizzimenti MA, Axelson RD. Assessing student engagement and self-regulated learning in a medical gross anatomy course. Anatomical Sciences Education. 2015;8(2):104-10.
Ploubidis_2011_Demog	Mi	Ploubidis GB, Grundy E. Health Measurement in Population Surveys: Combining Information from Self-reported and Observer-Measured Health Indicators. Demography. 2011;48(2):699-724.
PriceH_2014_EduPol	Mi	Price HE. Assessing U.S. Public School Quality: The Advantages of Combining Internal “Consumer Ratings” With External NCLB Ratings. Educational Policy. 2014;30(3):403-33.
Providelo_2011_Transpo	Mi	Providelo JK, da Penha Sanches S. Roadway and traffic characteristics for bicycling. Transportation. 2011;38(5):765-77.
Rapp_2013_FiNeurol	Mi	Rapp PE, Rosenberg BM, Keyser DO, Nathan D, Toruno KM, Cellucci CJ, et al. Patient characterization protocols for psychophysiological studies of traumatic brain injury and post-TBI psychiatric disorders. Frontiers in Neurology. 2013;4 JUL.
Raykov_2004_BehThe	Mi	Raykov T. Behavioral scale reliability and measurement invariance evaluation using latent variable modeling. Behavior Therapy. 2004;35(2):299-331.
Sass_2014_SEM	Mi	Sass DA, Schmitt TA, Marsh HW. Evaluating Model Fit With Ordered Categorical Data Within a Measurement Invariance Framework: A Comparison of Estimators. Structural Equation Modeling. 2014;21(2):167-80.
Schulz_2013_Measur	Mi	Schulz E. What is essential in standard setting and construct maps? Commentary on Adam E. Wyse's "Construct maps as a foundation for standard setting". Measurement. 2013;11(4):192-4.
Schwartz_2014_JNeuroSci	Mi	Schwartz CE, Ayandeh A, Motl RW. Investigating the minimal important difference in ambulation in multiple sclerosis: A disconnect between performance-based and patient-reported outcomes? Journal of the Neurological Sciences. 2014;347(1-2):268-74.
Sheehan_2013_EMIP	Mi	Sheehan KM. Measuring cohesion: An approach that accounts for differences in the degree of integration challenge presented by different types of sentences. Educational Measurement: Issues and Practice. 2013;32(4):28-37.
Skopp_2012_JCliPsycho	Mi	Skopp NA, Swanson R, Luxton DD, Reger MA, Trofimovich L, First M, et al. An Examination of the Diagnostic Efficiency of Post-Deployment Mental Health Screens. Journal of Clinical Psychology. 2012;68(12):1253-65.
Smout_2014_JCBehSci	Mi	Smout M, Davies M, Burns N, Christie A. Development of the Valuing Questionnaire (VQ). Journal of Contextual Behavioral Science. 2014;3(3):164-72.
Tabriz_2011_IJCARSur	Mi	Tabriz DM, Street M, Pilgram TK, Duncan JR. Objective assessment of operator performance during ultrasound-guided procedures. International Journal of Computer Assisted Radiology and Surgery. 2011;6(5):641-52.
Tesio_2012_IJRehRes	Mi	Tesio L. Outcome measurement in behavioural sciences: A view on how to shift attention from means to individuals and why. International Journal of Rehabilitation Research. 2012;35(1):1-12.
Tomarken_2005_ARCPsy	Mi	Tomarken AJ, Waller NG. Structural Equation Modeling: Strengths, Limitations, And Misconceptions. Annual Review of Clinical Psychology. 2005;1(1):31-65.
Turner_2002_JEChiPsy	Mi	Turner GFW, Thomas H. Bridging the gap between theory and model: A reflection on the balance scale task. Journal of Experimental Child Psychology. 2002;81(4):466-81.
Vandenberg_2002_ORM	Mi	Vandenberg RJ. Toward a Further Understanding of and Improvement in Measurement Invariance Methods and Procedures. Organizational Research Methods. 2002;5(2):139-58.
Vanderbei_2014_SIAMRev	Mi	Vanderbei RJ, Scharf G, Marlow D. A regression approach to fairer grading. SIAM Review. 2014;56(2):337-52.
VanDerEijk_2015_PLOSONE	Mi	Van Der Eijk C, Rose J. Risky business: Factor analysis of survey data - Assessing the probability of incorrect dimensionalisation. PLoS ONE. 2015;10(3).
VegaFernandez_2015_ArthCR	Mi	Vega-Fernandez P, Vanderburgh White S, Zelko F, Ruth NM, Levy DM, Muscal E, et al. Cognitive performance scores for the pediatric automated neuropsychological assessment metrics in childhood-onset systemic lupus erythematosus. Arthritis Care and Research. 2015;67(8):1119-27.
VerhagenT_2015_JAInfSys	Mi	Verhagen T, van den Hooff B, Meents S. Toward a better use of the semantic differential in IS research: An integrative framework of suggested action. Journal of the Association of Information Systems. 2015;16(2):108-43.
Vinik_2014_JPNS	Mi	Vinik EJ, Vinik AI, Paulson JF, Merkies ISJ, Packman J, Grogan DR, et al. Norfolk QOL-DN: Validation of a patient reported outcome measure in transthyretin familial amyloid polyneuropathy. Journal of the Peripheral Nervous System. 2014;19(2):104-14.
Weiner_2015_AlzDem	Mi	Weiner MW, Veitch DP, Aisen PS, Beckett LA, Cairns NJ, Cedarbaum J, et al. 2014 Update of the Alzheimer's Disease Neuroimaging Initiative: A review of papers published since its inception. Alzheimer's and Dementia. 2015;11(6):e1-e120.
WilliamsDA_2011_ArthCR	Mi	Williams DA, Arnold LM. Measures of fibromyalgia: Fibromyalgia Impact Questionnaire (FIQ), Brief Pain Inventory (BPI), Multidimensional Fatigue Inventory (MFI-20), Medical Outcomes Study (MOS) Sleep Scale, and Multiple Ability Self-Report Questionnaire (MASQ). Arthritis Care and Research. 2011;63(SUPPL. 11).
WongCKH_2013_QoLR	Mi	Wong CKH, Lam CLK, Mulhern B, Law WL, Poon JTC, Kwong DLW, et al. Measurement invariance of the Functional Assessment of Cancer Therapy - Colorectal quality-of-life instrument among modes of administration. Quality of Life Research. 2013;22(6):1415-26.
WrightNA_2015_IJSelAss	Mi	Wright NA, Kutschenko K, Bush BA, Hannum KM, Braddy PW. Measurement and predictive invariance of a work-life boundary measure across gender. International Journal of Selection and Assessment. 2015;23(2):131-48.
Zargaryan_2014_IJAEngRes	Mi	Zargaryan EV, Zargaryan YA, Pushnina IV, Finaev VI, Shestova EA. Testing knowledge on the basis of stochastic analysis. International Journal of Applied Engineering Research. 2014;9(22):16403-12.
Zecca_2013_JCCPsy	Mi	Zecca G, Verardi S, Antonietti JP, Dahourou D, Adjahouisso M, Ah-Kion J, et al. African Cultures and the Five-Factor Model of Personality: Evidence for a Specific Pan-African Structure and Profile? Journal of Cross-Cultural Psychology. 2013;44(5):684-700.
ZhangZu_2013_InfSci	Mi	Zhang Z, Lin H, Liu K, Wu D, Zhang G, Lu J. A hybrid fuzzy-based personalized recommender system for telecom products/services. Information Sciences. 2013;235:117-29.
Zhao_2014_Entropy	Mi	Zhao X, Hou Y, Song D, Li W. Extending the extreme physical information to universal cognitive models via a confident information first principle. Entropy. 2014;16(7):3670-88.
ZhuW_2013_RQExeSpo	Mi	Zhu W. Science and art of setting performance standards and cutoff scores in kinesiology. Research Quarterly for Exercise and Sport. 2013;84(4):456-68.
